# Supplementary material for: A unified multi-level model approach to assessing patient responsiveness including; return to normal, minimally important differences and minimal clinically important improvement for patient reported outcome measures
Source: PubMed Central journal article supplement — BMJ Open. 2017 Jul 21;7(7):e014041. doi: 10.1136/bmjopen-2016-014041 (PMC5577889; doi:10.1136/bmjopen-2016-014041), 2017-07-21
Supplement: bmjopen-2016-014041.draft_revisions.pdf [file bmjopen-2016-014041.draft_revisions.pdf]

# BMJ Open

**A unified multi-level model approach to assessing patient responsiveness including; return to normal, minimally important differences, and minimally clinical important differences for patient reported outcome measures.**

|                                 |                                                                                                                                                                                                                                                                                                                                                                                                                                                                                                                                                                                                                                                                                                                                         |
|---------------------------------|-----------------------------------------------------------------------------------------------------------------------------------------------------------------------------------------------------------------------------------------------------------------------------------------------------------------------------------------------------------------------------------------------------------------------------------------------------------------------------------------------------------------------------------------------------------------------------------------------------------------------------------------------------------------------------------------------------------------------------------------|
| Journal:                        | <i>BMJ Open</i>                                                                                                                                                                                                                                                                                                                                                                                                                                                                                                                                                                                                                                                                                                                         |
| Manuscript ID                   | bmjopen-2016-014041                                                                                                                                                                                                                                                                                                                                                                                                                                                                                                                                                                                                                                                                                                                     |
| Article Type:                   | Research                                                                                                                                                                                                                                                                                                                                                                                                                                                                                                                                                                                                                                                                                                                                |
| Date Submitted by the Author:   | 26-Aug-2016                                                                                                                                                                                                                                                                                                                                                                                                                                                                                                                                                                                                                                                                                                                             |
| Complete List of Authors:       | Sayers, Adrian; University of Bristol, Musculoskeletal Research Unit<br>Wylde, Vikki; University of Bristol, School of Clinical Sciences<br>Lenguerrand, Erik; University of Bristol School of Clinical Science, School of Clinical Sciences, Musculoskeletal Research Unit<br>Goberman-Hill, Rachael; University of Bristol, School of Clinical Sciences<br>Dawson, Jill; University of Oxford, Department of Public Health<br>Beard, David; University of Oxford, Nuffield Dept of Orthopaedics, Rheumatology and Musculoskeletal Sciences<br>Price, Andrew; University of Oxford, Nuffield Department of Orthopaedics, Rheumatology and Musculoskeletal Sciences<br>Blom, Ashley; University of Bristol, School of Clinical Sciences |
| <b>Primary Subject Heading</b>: | Research methods                                                                                                                                                                                                                                                                                                                                                                                                                                                                                                                                                                                                                                                                                                                        |
| Secondary Subject Heading:      | Rheumatology, Epidemiology, Patient-centred medicine                                                                                                                                                                                                                                                                                                                                                                                                                                                                                                                                                                                                                                                                                    |
| Keywords:                       | Patient Responsiveness, Multi-level Modelling, Return To Normal, Minimal Important Difference, Minimal Clinically Important Difference, Patient-reported outcomes                                                                                                                                                                                                                                                                                                                                                                                                                                                                                                                                                                       |
|                                 |                                                                                                                                                                                                                                                                                                                                                                                                                                                                                                                                                                                                                                                                                                                                         |

SCHOLARONE™  
Manuscripts

1  
2  
3 **A unified multi-level model approach to assessing patient responsiveness including; return to**  
4 **normal, minimally important differences, and minimally clinical important differences for patient**  
5 **reported outcome measures.**  
6  
7  
8  
9

10 Sayers A<sup>1,2</sup>, Wylde V<sup>1</sup>, Lenguerrand E<sup>1</sup>, Gooberman-Hill R<sup>1</sup>, Dawson J<sup>3</sup>, Beard D<sup>4</sup>, Price A<sup>4</sup>, Blom AW<sup>1</sup>

13 Address for Correspondence

14  
15  
16 Adrian Sayers, Musculoskeletal Research Unit, School of Clinical Sciences, University of Bristol,  
17  
18 Learning and Research Building (Level 1), Southmead Hospital, Westbury on Trym, Bristol, BS10 5NB  
19

20  
21 E-mail: [adrian.sayers@bristol.ac.uk](mailto:adrian.sayers@bristol.ac.uk)  
22

23  
24 Tel: 44 (0)117 4147880; Fax + 44(0)117 414 7924  
25

- 26  
27  
28  
29  
30  
31  
32  
33  
34  
35  
36  
37  
38  
39  
40  
41  
42  
43  
44
1. Musculoskeletal Research Unit, School of Clinical Sciences, University of Bristol, Southmead Hospital, Westbury On Trym, Bristol, BS10 5NB (AS, VW, EL, RGH, AWB).
  2. School of Social and Community Medicine, University of Bristol, 39 Whatley Road, Bristol, BS8 2PS.
  3. Nuffield Department of Population Health, University of Oxford, Old Road Campus, Headington, Oxford OX3 7LF, UK (DB, AP).
  4. Biomedical Research Unit, Nuffield Department of Orthopaedics, Rheumatology and Musculoskeletal Science, Nuffield Orthopaedic Centre, Windmill Road, Oxford, OX2 9JA (JD).

45 Word Count 4010  
46  
47  
48  
49  
50

51  
52 Keywords: Patient Responsiveness, Multi-level Modelling, Return To Normal , Minimal Important  
53  
54 Difference, Minimal Clinically Important Difference, Patient-reported outcomes, Clinical significance  
55  
56 Anchor-based methods; Distribution based methods  
57  
58  
59  
60

## Abstract (271 Words)

### Objective

This article reviews four commonly used approaches to assess patient responsiveness to a treatment or therapy [Return To Normal (RTN), Minimal Important Difference (MID), Minimal Clinically Important Difference (MCID), OMERACT-OARSI (OO)], and demonstrates how each of the methods can be formulated in a multi-level modelling (MLM) framework.

### Design

Cohort Study

### Setting

A cohort of patients undergoing total hip and knee replacement were recruited from a single UK NHS hospital.

### Population

400 Patients from The Arthroplasty Pain Experience (APEX) cohort study undergoing total hip (n=210) and knee (n=190) replacement who completed the Intermittent and Constant Osteoarthritis Pain (ICOAP) questionnaire prior to surgery and then at 3, 6 and 12 months after surgery.

### Primary Outcomes

The primary outcome was defined as response to treatment following total hip or knee replacement. We compared baseline scores, change scores, and proportion of individuals defined as “responders” using traditional and MLM approaches to patient responsiveness.

### Results

Using existing approaches, baseline and change scores are underestimated, and the variance of baseline and change scores overestimated in comparison to MLM approaches. MLM increases the proportion of individuals defined as responding in RTN, MID, and OO criteria compared to existing approaches. Using MLM with the MCID criteria reduces the number of individuals identified as responders.

### Conclusion

1  
2  
3  
4  
5  
6  
7  
8  
9  
10  
11  
12  
13  
14  
15  
16  
17  
18  
19  
20  
21  
22  
23  
24  
25  
26  
27  
28  
29  
30  
31  
32  
33  
34  
35  
36  
37  
38  
39  
40  
41  
42  
43  
44  
45  
46  
47  
48  
49  
50  
51  
52  
53  
54  
55  
56  
57  
58  
59  
60

MLM improves the estimation of the standard deviation of baseline and change scores by explicitly incorporating measurement error into the model, and avoiding regression to the mean when making individual predictions. Using refined definitions of responsiveness may lead to a reduction in misclassification when attempting to predict who does and does not respond to an intervention, and clarifies the similarities between existing methods.

For peer review only

## Article Summary

### Strengths and limitations of this study

- Four different approaches to patient responsiveness can be unified into a multi-level modelling.
- A multi-level model framework of patient responsiveness highlights the similarities and differences between existing methods.
- Multi-level models provide a simple framework which incorporates measurement error and non-linear change in trajectories of patient recovery.
- Multi-level models are technically more demanding than existing formulations of patient responsiveness, and convergence is not guaranteed.
- Multi-level models does not improve the arbitrary placement of the thresholds that define responsiveness in comparison to existing methods

## INTRODUCTION

Joint replacement is an increasingly common elective procedure worldwide<sup>1-3</sup> and improving patient reported outcomes after joint replacement is a key research priority due to high prevalence of poor outcomes after joint arthroplasty.<sup>4</sup> Poor outcomes include continuing pain, functional limitations,<sup>5</sup> and increased healthcare utilisation.<sup>6</sup> However, there is some debate on how the efficacy of interventions can be judged due to the variety of different outcomes used in orthopaedic research.<sup>7-18</sup> Traditionally, objective primary outcomes such as prosthetic survivorship and mortality rates were used.<sup>19</sup> However, more recently there has been a shift in focus which ensures that patients' perspective is central to assessment of intervention success.<sup>20</sup> Many studies now use patient reported outcome measures (PROMs) as endpoints, and these tools can assess a variety of health outcomes, including pain,<sup>7,21</sup> physical functioning,<sup>7</sup> mental well-being<sup>22</sup> and health-related quality of life.<sup>23</sup>

Although PROMs are widely used,<sup>4</sup> there is still debate in how the results should be interpreted and how to define a clinically meaningful change.<sup>24-35</sup> From a measurement perspective, the ability to estimate if a change has occurred depends on the application of an appropriate statistical model. From a clinical perspective, some authors suggest that the average statistical change is insufficient to "tell you anything about an individual's chances of improving".<sup>36</sup> Therefore, the utility of simple statistical analyses are limited when attempting to help patients weigh up the risks and benefits of undergoing surgery.

In order to supplement simple statistical analysis, many researchers attempt to dichotomise the population into those who have or have not responded to an intervention. There are a number of different methods (definitions) that can be used to dichotomise the population, and these secondary analyses are collectively referred to as responsiveness analyses.<sup>36</sup> Four substantively different methods of estimating the proportion of individuals who respond to an intervention have been previously identified in orthopaedic research:<sup>36</sup> 1) Return to Normal (RTN), 2) Distribution-based

1  
2  
3 Minimally Important Difference (MID), 3) Anchor-based Minimal Clinically Important Difference  
4 (MCID), and 4) the OMERACT-OARSI (OO) responder criteria. The first three approaches are generic  
5 and used in many fields of health research, whereas the fourth approach is specific to orthopaedic  
6 research, but in principle could be used in many fields of health research.  
7  
8  
9

10  
11  
12 Each of these approaches is often thought to be methodologically distinct. However, all of the  
13 methods can be shown to be special cases of a multi-level model (MLM). In this paper we will  
14 describe these four approaches to calculating responsiveness and highlight the substantively  
15 different decisions each method makes. We will then describe how each approach can be translated  
16 into a MLM framework, emphasising the benefits of the translation, and contrast the approaches  
17 using an example from the APEX cohort study.<sup>37</sup>  
18  
19  
20  
21  
22  
23  
24  
25  
26  
27  
28  
29  
30  
31  
32  
33  
34  
35  
36  
37  
38  
39  
40  
41  
42  
43  
44  
45  
46  
47  
48  
49  
50  
51  
52  
53  
54  
55  
56  
57  
58  
59  
60

## METHODS

We outline the four existing approaches to patient responsiveness previously used in orthopaedic research<sup>36</sup>, and describe their potential limitations, and how they can be formulated in a MLM framework.

### Review of existing approaches to responsiveness

Return to normal (RTN)<sup>26</sup> suggests that an individual has returned to 'normal' if their score on a post-intervention outcome is greater than two standard deviations (SD) from the mean baseline response.

The use of two standard deviations appears to be justified on theoretical grounds, however it is quite arbitrary. Assuming scores are normally distributed and measured without error, two SD's corresponds to a 95.5% prediction interval for the mean, which is similar to the equally arbitrary and much criticised significance threshold  $p=0.05$  (Type I error=0.05) criterion used throughout medical research<sup>38,39</sup>. However, there is no reason why a 1.6 or a 2.6 SD cut-offs should not be used in preference, which correspond to 90% and 99% prediction intervals.

The method also assumes the observed change is unlikely to be due to chance alone and does not account for any uncertainty. In order to alleviate this problem the use of the Relative Change Index (RCI) was proposed to be used in conjunction with the RTN classification.<sup>24,27</sup> The RCI constructs a test of the individual's score at follow up compared to their baseline, where the standard error of the difference is estimated indirectly using the SD of the baseline score and an assumed reliability coefficient from empirical research or a range of reliability values in the spirit of a sensitivity analysis.

A commonly described distribution-based Minimally Important Difference (MID) method classifies individuals as responders if their observed change is greater than a fixed proportion of the SD of the pre-post-surgery change score.<sup>33</sup> There has been much debate about the exact size, or proportion, of the SD change score to use, however 0.5 SD's has been reported widely and suggested to be a



1  
2  
3 difference that is minimally perceptible to patients.<sup>30</sup> Any individual with a change score greater  
4  
5 than 0.5 SD is defined as responding to the treatment. Similar to the RTN criteria, the decision to use  
6  
7 0.5 is arbitrary and there is no reason why more or less stringent criteria of 0.25, 1 or 2 SD's could  
8  
9 not be used.  
10

11  
12 Anchor-based Minimally Clinically Important Difference (MCID) is similar to the MID approach, in  
13  
14 that it defines an individual as a responder based on their individual change score. However, the cut-  
15  
16 point is determined in individuals who report themselves as having an outcome which is either  
17  
18 good/satisfactory or perceived as improved from baseline using an external anchoring question. The  
19  
20 authors proposed using a cut point at the 75th centile of the change score, in those who are  
21  
22 satisfied.<sup>35</sup> Therefore any individuals, whether they are satisfied or not, who has a change score  
23  
24 greater than the 75th centile are defined as responders.  
25  
26

27  
28 The OMERACT-OARSI (OO) criteria<sup>32</sup> recognises that a response to an intervention may occur in one  
29  
30 or more different measured outcomes, i.e. a multivariate response mechanism. In keeping with  
31  
32 much of the orthopaedic literature they assume the proposed score has been rescaled between 0  
33  
34 and 100<sup>32</sup>, and that a responder is defined as any individual with 1. a  $\geq 50\%$  relative change or a  
35  
36  $\geq 20$  point absolute change on one or more responses scales, or 2. a  $\geq 20\%$  relative change or  $\geq 10$   
37  
38 point absolute change in two or more response scales. Relative change is defined as the ratio of the  
39  
40 change to the individual baseline score multiplied by 100. Unlike the RTN, MID, or MCID it is very  
41  
42 clear that the thresholds for relative and absolute changes are based on a panel of expert opinions  
43  
44 and are fixed.  
45  
46

47  
48 Despite the variety of existing approaches used to identifying responders there are a number of  
49  
50 problems common to all methods. Common assumptions include: 1) Each observed outcome is  
51  
52 measured without error, test-retest reliability studies indicate that this is not a realistic assumption  
53  
54 .<sup>40</sup> 2) Regression to the mean does not occur and therefore the variance of the change score will not  
55  
56  
57  
58  
59  
60

1  
2  
3 be overestimated. 3) Floor and ceiling effects do not bias estimates of the variance of the change  
4  
5 score.<sup>41</sup>  
6

7  
8 Furthermore in RTN, specific combinations of means and variances may result in a threshold beyond  
9  
10 the range of the measurement tool, therefore no individuals would be defined as responding to a  
11  
12 therapy. The MCID approach assumes the additional anchoring variable is measured without error  
13  
14 and the response trajectory is distinct from those who are unsatisfied.<sup>42</sup> The method also assumes a  
15  
16 two parameter logistic function is an appropriate model for the cumulative proportional rank of  
17  
18 patients and change in outcome, and that there is no uncertainty in the calculation of the threshold  
19  
20 .<sup>43</sup> Finally, the OO approach considers a response in two or more outcomes. However, it does not  
21  
22 explicitly describe how the correlation between the two outcomes is accounted for, and fails to  
23  
24 recognise that if not modelled appropriately may introduce bias.<sup>44-46</sup>  
25  
26

27  
28 The four methods identified have a number of other limitations,<sup>25</sup> but they are difficult to compare  
29  
30 methods when presented as distinct approaches.  
31  
32

33 Embedding them in a unified statistical framework makes their underlying assumptions explicit,  
34  
35 whilst highlighting their similarities and differences. In addition, it provides a framework to  
36  
37 incorporate non-linear change, measurement error, and variability in the timing of measurement  
38  
39 occasions.  
40  
41

42  
43 Multi-level modelling approach to responsiveness  
44

45  
46 We now present a general multi-level model for patient responsiveness and show how the four  
47  
48 approaches described above can be specified as special cases.  
49

50  
51 Under the assumption of linear change, the measured response at the  $i^{\text{th}}$  occasion for the  $j^{\text{th}}$   
52  
53 individual is modelled as a linear function of time.  
54

55  
56 *Equation 1*  
57  
58  
59  
60

$$y_{ij} = \beta_0 + u_{0j} + (\beta_1 + u_{1j})t_{ij} + \varepsilon_{ij}$$

$$\begin{bmatrix} u_{0j} \\ u_{1j} \end{bmatrix} \sim N(0, \Omega_u), \quad \Omega_u = \begin{bmatrix} \sigma_{u0}^2 & \\ \sigma_{u01} & \sigma_{u1}^2 \end{bmatrix}$$

$$[\varepsilon_{ij}] \sim N(0, \sigma_\varepsilon^2)$$

where  $t_{ij}$  is the time at which measurement  $i$  was taken on individual  $j$ , coded as zero at baseline.  $\beta_0$  is the baseline population average response, and  $u_{0j}$  represents the  $j^{\text{th}}$  individual difference from the baseline response. The sum of  $\beta_0 + u_{0j}$  is the estimated individual baseline response.  $\beta_1$  represents the population average change per unit increase in time, and  $u_{1j}$  represents the  $j^{\text{th}}$  individual difference from the population average change per unit increase in time. The sum of  $\beta_1 + u_{1j}$  is the estimated individual average change per unit increase in time. Measurement error in the linear trajectory is represented by  $\varepsilon_{ij}$ .

The variance in individual deviations from the population average response at baseline and average rate of change are  $\sigma_{u0}^2$  and  $\sigma_{u1}^2$  respectively. Furthermore, the correlation between baseline measurements and rate of change can be assumed to be independent or correlated by constraining  $\sigma_{u01}$  to be zero or allowing it to be freely estimated. The variances of the shrunken residuals  $\hat{u}_{0j}$  and  $\hat{u}_{1j}$ , also known as empirical bayes estimates, are typically less than the estimated population variances  $\hat{\sigma}_{u0}^2$  and  $\hat{\sigma}_{u1}^2$  as they shrink towards the population averages of  $\beta_0$  and  $\beta_1$ . The extent of the shrinkage depends on the number of measurement occasions and the within individual variability, with greater shrinkage as the number of measurement occasions decrease and as the within individual variance increases. A more detailed discussion of MLM can be found in most advanced statistics textbooks.<sup>44 47 48</sup>

We now describe how the four traditional approaches to measuring patient responsiveness can be unified into a MLM framework. General benefits of the MLM approach include: 1) with more than

three measurement occasions a MLM directly allows for measurement error,  $\varepsilon_{ij}$ ; 2) the use of shrunken residuals  $\widehat{u}_{0j}$  and  $\widehat{u}_{1j}$  allow for regression to the mean when predicting an individual's score<sup>49</sup>; 3) MLM can be extended to include multivariate response models which appropriately model the correlation between two or more outcomes; and 4) MLM allows for variability in the timing of measurement occasions.

*MLM-Return To Normal.* In order to apply the RTN criteria using a MLM approach we first estimate the baseline population SD in individuals considered to be abnormal using the model described in Equation 1. Assuming  $y_{ij}$  is normally distributed at baseline with a population mean  $\beta_0$  and variance  $\sigma_{u0}^2$  a  $100 \cdot (1 - \frac{\alpha}{2})$  prediction interval for the baseline measurement can be constructed i.e.  $[\beta_0 - \sigma_{u0}z_{(1-\frac{\alpha}{2})}, \beta_0 + \sigma_{u0}z_{(1-\frac{\alpha}{2})}]$  where  $\alpha$  is the type I error rate and  $z$  is the critical value from a standard normal distribution. Importantly  $y_{ij}$  is not assumed to be measured without error and therefore estimates of  $\sigma_{u0}^2$  are less likely to be biased than using simple methods. However, it is important to note that the choice of  $\alpha$  is entirely that of the researcher, and whilst  $\alpha = 0.05$  (leading to  $z = 1.96 \approx 2$ ) is common, more or less stringent criteria could be applied.

The second step is to estimate the score of the individual at time  $j$  following surgery and determine if it is within the baseline prediction interval. This prediction is simply calculated by substituting estimates of  $\beta_0$ ,  $\beta_1$ ,  $u_{0j}$  and  $u_{1j}$  into Equation 1, to give the empirical best linear unbiased prediction (eBLUP) for the  $j^{\text{th}}$  individual at the  $i^{\text{th}}$  occasion.<sup>50</sup>

Finally, in order to determine whether or not the response of the individual following surgery is greater than one would attribute to chance alone, i.e. the null hypothesis that the  $j^{\text{th}}$  individuals slope is not equal to zero, a test statistic similar to RCI should be conducted,

$$(\hat{\beta}_1 + \hat{u}_{1j})/SE(\hat{\beta}_1 + \hat{u}_{1j}), \text{ where } SE(\hat{\beta}_1 + \hat{u}_{1j}) = \sqrt{VAR(\hat{\beta}_1) + VAR(\hat{u}_{1j})}.$$

1  
2  
3 *MLM-Minimally Important Difference.* The threshold of minimally important difference can also be  
4  
5 estimated using a MLM. Similar to RTN, a linear model of change is applied, as in Equation 1. Then  
6  
7 the population SD of the change score per unit increase in  $t$  is estimated by  $\sigma_{u1}$ . For example, if  $t$  is  
8  
9 coded in months and responsiveness at 3 months post-surgery was of interest, the estimated SD of  
10  
11 the change score at 3 months would be  $3\sigma_{u1}$ , and the threshold of responsiveness would be  $3\sigma_{u1}/2$ .  
12  
13 By comparing the estimated change for the  $j^{\text{th}}$  individual  $(\hat{\beta}_1 + \hat{u}_{1j})t$  to the chosen threshold at  
14  
15 time  $t$ , i.e.  $t\sigma_{u1}/2$ , the individual can be classed as a responder or not. The MID approach does not  
16  
17 specifically state whether a test of whether an individual's change scores is less than the MID  
18  
19 threshold should be conducted, but a test statistic is simply constructed as  
20  
21

$$22 \left( (\hat{\beta}_1 + \hat{u}_{1j})t - \left( \frac{t\hat{\sigma}_{u1}}{2} \right) \right) / (SE(\hat{\beta}_1 + \hat{u}_{1j})t).$$

23  
24  
25  
26  
27 *MLM-Minimally Clinically Important Difference.* The MLM MCID requires a simple extension of the  
28  
29 univariate model presented previously (Equation 1). The outcome of interest is stratified using an  
30  
31 external criterion. The stratification is achieved by creating dummy variables for those who are  
32  
33 un/satisfied with some aspect of their treatment i.e.  $x_{1i}$  takes the values 0 and 1 representing  
34  
35 unsatisfied and satisfied individuals respectively, and  $x_{2i} = 1 - x_{1i}$ . These dummy variables are then  
36  
37 included as additional explanatory variables, with no overall model intercept, and interacted with  $t$ .  
38  
39

40  
41 Equation 2

$$42 \quad y_{ij} = (\beta_0 + u_{0j})x_{1i} + (\beta_1 + u_{1j})t_{ij}x_{1i} + \varepsilon_{1ij}x_{1i}$$

$$43 \quad + (\beta_2 + u_{2j})x_{2i} + (\beta_3 + u_{3j})t_{ij}x_{2i} + \varepsilon_{2ij}x_{2i}$$

$$44 \quad \begin{bmatrix} u_{0j} \\ u_{1j} \\ u_{2j} \\ u_{3j} \end{bmatrix} \sim N(0, \Omega_u): \quad \Omega_u = \begin{bmatrix} \sigma_{u0}^2 & & & \\ \sigma_{u01} & \sigma_{u1}^2 & & \\ 0 & 0 & \sigma_{u2}^2 & \\ 0 & 0 & \sigma_{u23} & \sigma_{u3}^2 \end{bmatrix}$$

$$\begin{bmatrix} \varepsilon_{1ij} \\ \varepsilon_{2ij} \end{bmatrix} \sim N(0, \Omega_\varepsilon): \quad \Omega_\varepsilon = \begin{bmatrix} \sigma_{\varepsilon_1}^2 & 0 \\ 0 & \sigma_{\varepsilon_2}^2 \end{bmatrix}$$

Therefore  $\beta_0$  and  $\beta_2$  are the mean population outcome score at baseline for those who are satisfied and unsatisfied respectively, and  $\beta_1$  and  $\beta_3$  are the corresponding mean population changes per unit of time. Variances and covariances are similarly interpreted for those who are satisfied and unsatisfied respectively. However, that satisfaction on the external anchoring question is assumed to be known without error, and individual effects and errors for  $x_{1i}$  are uncorrelated with those for  $x_{2i}$  because the satisfied and unsatisfied categories are mutually exclusive.

Following prediction of each individual's trajectory, the second stage in the MCID method requires a threshold for determining responsiveness. Using a similar suggestion to Tubach et al.,<sup>35</sup> the 75<sup>th</sup> centile of those who are satisfied could be used to classify all individuals as responding or not. Similar to the MID there is no suggestion of whether a test against the null value of the 75<sup>th</sup> centile should be constructed, but this is easily done within the MLM framework.

*MLM-OMERACT-OARSI criteria.* The OO criteria can be similarly extended into a multi-variate MLM framework by the inclusion of dummy variables and reshaping into a "double" long format with both responses stored in a single vector. Figure 1 illustrates the data structure for a bivariate model.

Figure 1

| Single long |     |       |       | Double Long |     |     |       |       |
|-------------|-----|-------|-------|-------------|-----|-----|-------|-------|
| $j$         | $t$ | $y_1$ | $y_2$ | $j$         | $t$ | $y$ | $w_1$ | $w_2$ |
| 1           | 1   | 40    | 70    | 1           | 1   | 40  | 1     | 0     |
|             |     |       |       | 1           | 2   | 50  | 1     | 0     |
|             |     |       |       | 1           | 3   | 60  | 1     | 0     |

|   |   |    |     |         |   |   |     |   |   |
|---|---|----|-----|---------|---|---|-----|---|---|
| 1 | 2 | 50 | 80  | <-----> | 1 | 4 | 70  | 1 | 0 |
| 1 | 3 | 60 | 90  |         | 1 | 1 | 70  | 0 | 1 |
| 1 | 4 | 70 | 100 |         | 1 | 2 | 80  | 0 | 1 |
|   |   |    |     |         | 1 | 3 | 90  | 0 | 1 |
|   |   |    |     |         | 1 | 4 | 100 | 0 | 1 |

Dummy variables, also known as response indicators, are used to denote the response options:  $w_{1i}$  is coded 1 for the first measurement outcome (pain) and 0 for the second outcome (function), and  $w_{2i} = 1 - w_{1i}$ . The response indicators and their interactions with  $t$  are included as explanatory variables to obtain the following bivariate response model.

Equation 3

$$y_{ij} = (\beta_0 + u_{0j})w_{1i} + (\beta_1 + u_{1j})t_{ij}w_{1i} + \varepsilon_{1ij}w_{1i} \\ + (\beta_2 + u_{2j})w_{2i} + (\beta_3 + u_{3j})t_{ij}w_{2i} + \varepsilon_{2ij}w_{2i}$$

$$\begin{bmatrix} u_{0j} \\ u_{1j} \\ u_{2j} \\ u_{3j} \end{bmatrix} \sim N(0, \Omega_u): \quad \Omega_u = \begin{bmatrix} \sigma_{u0}^2 & & & \\ \sigma_{u01} & \sigma_{u1}^2 & & \\ \sigma_{u02} & \sigma_{u12} & \sigma_{u2}^2 & \\ \sigma_{u03} & \sigma_{u13} & \sigma_{u23} & \sigma_{u3}^2 \end{bmatrix}$$

$$\begin{bmatrix} \varepsilon_{1ij} \\ \varepsilon_{2ij} \end{bmatrix} \sim N(0, \Omega_\varepsilon): \quad \Omega_\varepsilon = \begin{bmatrix} \sigma_{\varepsilon1}^2 & \\ \sigma_{\varepsilon12} & \sigma_{\varepsilon2}^2 \end{bmatrix}$$

With a similar functional form to the univariate MLM, there are separate population and individual intercepts for the first and second outcome ( $\beta_0, \beta_2$  and  $u_{0j}, u_{2j}$  respectively), and separate population and individual slopes are estimated for the second outcome ( $\beta_1, \beta_3$  and  $u_{1j}, u_{3j}$ ). Using a MLM approach the outcomes are modelled jointly, which allows for non-zero covariances

1  
2  
3 between the intercepts and slopes of the two responses ( $\sigma_{u02}, \sigma_{u12}, \sigma_{u03}, \sigma_{u13}$ ). The measurement  
4  
5 errors for the two responses are not assumed to be independent, with their covariance directly  
6  
7 estimated ( $\sigma_{\varepsilon12}$ ).  
8  
9

10 Finally, the threshold of response must be decided and individual trajectories estimated and  
11  
12 classified. Similar to the other methods it is relatively simple to construct a test statistic for testing  
13  
14 whether individual slopes are significantly different from the chosen threshold.  
15  
16

17 *Limitations of the MLM approach.* The MLM approach described by Equation 1, Equation 2 and 3  
18  
19 assumes that change in the outcome is linearly associated with time. The linearity assumption is  
20  
21 imposed for simplicity. Non-linear changes are easily incorporated by including higher order  
22  
23 polynomials or using linear or non-linear splines.<sup>51</sup>  
24  
25

26  
27 The standard MLM approach also fails to directly address the issue of floor and ceiling effects.  
28  
29 Mixed response multi-level tobit models allow for such effects and provide some adjustment.<sup>41 52</sup>  
30  
31 Furthermore, whilst the MLM described in Equation 2 allow for heterogeneity in known groups, they  
32  
33 fail to allow for heterogeneity in trajectories when the groups are unknown. The use of group based  
34  
35 trajectory models or growth mixture models in these circumstances may reveal latent (unobserved)  
36  
37 classes of individuals with distinct patterns of recovery.<sup>53</sup>  
38  
39  
40  
41  
42  
43  
44  
45  
46  
47  
48  
49  
50  
51  
52  
53  
54  
55  
56  
57  
58  
59  
60



1  
2  
3 Example: The APEX cohort Study  
4

5  
6 Using a mixed cohort of patients undergoing THR and TKR,<sup>37</sup> we investigated the performance of the  
7  
8 existing and MLM approaches using four definitions of responsiveness. A simulated dataset and code  
9  
10 to fit each of these models is included in supplementary material.  
11

12  
13 Patients in the APEX cohort completed the Intermittent and Constant Osteoarthritis Pain (ICOAP)  
14  
15 questionnaire before and after surgery at approximately 0, 3, 6 and 12 months. The date at which  
16  
17 the post-surgical questionnaire was completed is recorded in days post-surgery. As the name  
18  
19 suggests, the ICOAP questionnaire attempts to measure intermittent and constant pain.<sup>21</sup> The  
20  
21 developers of the tool suggest three ways of summarising the scale to generate an intermittent,  
22  
23 constant and total pain scores (the sum of the intermittent and constant pain subscales). The tool is  
24  
25 scored between 0 and 100 and a full description of the ICOAP scale is provided in the original  
26  
27 validation paper.<sup>21</sup>  
28  
29

30  
31 Using the three methods of aggregation, we present estimates of pain at baseline and for change at  
32  
33 approximately 3 months post-surgery using summary statistics and multi-level model estimates.  
34  
35

36  
37 In order to facilitate comparisons between existing and MLM approaches we assume that all  
38  
39 individuals are measured at exactly 0, 3, 6, and 12 months. Whilst the existing approaches only  
40  
41 utilises the 0 and 3 month measurements the MLM approach uses a growth model using two linear  
42  
43 splines with a knot point at 3 months. The inclusion of the second spline and the additional two  
44  
45 measurement occasions allows adjustment for measurement error in the MLM approach. Table 1  
46  
47 and 2 presents results for patients undergoing THR and TKR respectively.  
48  
49  
50  
51  
52  
53  
54  
55  
56  
57  
58  
59  
60

## RESULTS

In all subdivisions of the ICOAP questionnaire, for THR/TKR patients, the estimates of the baseline mean and change scores are approximately equal to those from the MLM approaches. In addition, estimates of the SD of baseline and change score are overestimated using existing approaches in THR/TKR patients. The SD of baseline measurements is approximately 3.3 and 3.75 points greater than conventional methods in THR/TKR patients respectively, while the corresponding SD of change are approximately 6.3 and 7 points greater than existing methods.

### Return To Normal

Using similar baseline score estimates to the conventional RTN approach and different SD's results in a reduction in the threshold of response by approximately 5 points in THR/TKR patients. The change in threshold is due to smaller estimates of baseline and change SD's. When considering the total ICOAP score, the MLM approach classifies approximately 10% more individuals as responders than existing approaches. It is also interesting to note that the threshold of response using the existing approach when considering total ICOAP score in THR patients is beyond the range of the score.

### Minimally Important Difference

Using similar change score estimates and different SD's results in an approximately 2 point reduction in the MID threshold in THR/TKR patients. The reduced threshold results in more individuals being classified as responders using the MLM approach.

### Minimally Clinically Important Difference

Using the MLM approach in satisfied and unsatisfied individuals results in a small increase in the threshold of response in comparison to existing approaches. The increase in threshold is due to shrunken residuals and therefore reduced variability of predicted change scores. The increase in

1  
2  
3 threshold results in a reduced number of individuals (3% of THR patients and 6% of TKR patients)  
4  
5 being identified as responders.  
6  
7

#### 8 OMERACT-OARSI

9

10  
11 The OO approach uses fixed definitions of responsiveness. Individual estimates of change from the  
12 bivariate MLM for constant and intermittent pain are very similar to those from the univariate MLM.  
13  
14 However the standard deviation of the change score is reduced by approximately 0.5 and 1 points in  
15  
16 constant and intermittent pain comparing the univariate and bivariate MLM respectively, whereas  
17  
18 the SD of baseline score approximately the same. Despite the larger absolute threshold of 20 and 10  
19  
20 points for changes in 1 or 2 items respectively, i.e. larger than MID, there is an increase in the  
21  
22 proportion of individuals identified as responding. The increase is partly due to the use of the  
23  
24 relative change threshold, and the reduced variability in change in comparison to the univariate  
25  
26 MLM using MID definition of responsiveness.  
27  
28  
29  
30  
31  
32  
33  
34  
35  
36  
37  
38  
39  
40  
41  
42  
43  
44  
45  
46  
47  
48  
49  
50  
51  
52  
53  
54  
55  
56  
57  
58  
59  
60

1  
2  
3 DISCUSSION  
4  
5

6 The primary purpose of a responsiveness analysis is to convey the variability of an individual's  
7 chances of perceiving an improvement following a treatment. Existing approaches appear to be  
8 distinct from one another, and the relationships between each approach were unclear.  
9  
10

11  
12  
13 We have clearly shown how four commonly used approaches can be incorporated into the unified  
14 statistical framework of MLM. The application of patient responsiveness models in a cohort of  
15 orthopaedic patients illustrates how SD's of baseline and change scores in existing approaches are  
16 overestimated in comparison to the MLM approach. Thresholds for defining responders from MLM  
17 are lower when based on SD (RTN & MID), and higher when based on the distribution of predicted  
18 change scores (MCID).  
19  
20  
21  
22  
23  
24  
25

26  
27 Strengths & Limitations  
28  
29

30 One of the key benefits of adopting a MLM approach when defining clinically meaningful change is  
31 the improved estimation of individual change by the greater flexibility in the MLM framework.  
32 Specifically, MLM do not assume the response is measured without error, they adjust for regression  
33 to the mean, the trajectory of recovery is not constrained to be linear, and data from multiple  
34 measurements and variability in the timing of those measurement occasions can also be  
35 incorporated into the model. Furthermore, assuming the underlying MLM adequately represents the  
36 true causal mechanism, parameter estimates, SD's and standard errors will be unbiased in  
37 comparison to existing approaches.  
38  
39  
40  
41  
42  
43  
44  
45  
46  
47

48 Furthermore, the unification of existing approaches into a MLM framework clearly shows the  
49 relationship between the four different approaches. For example, RTN and MID share the same  
50 underlying model. MCID is also the same at RTN/MID if you assume the baseline and change scores  
51 are the same across strata of un/satisfied patients. Similarly, the model underlying OO approach is  
52  
53  
54  
55  
56  
57  
58  
59  
60

1  
2  
3 the same as the RTN/MID approach if you assume independence in the measured outcomes of the  
4  
5 two trajectories, and error term.  
6  
7

8 Despite the numerous benefits of adopting a MLM approach, it is not to say it is without some  
9  
10 limitations. MLM are technically more demanding than existing formulations of patient  
11  
12 responsiveness, and whilst there are no theoretical limits on how large or small samples have to be,  
13  
14 model convergence is not guaranteed. Furthermore, it is important to perform model diagnostic to  
15  
16 check the data fit with the model. MLM does not improve the arbitrary placement of the thresholds  
17  
18 that define responsiveness in comparison to existing methods, and despite the improved trajectory  
19  
20 modelling it is currently unclear if the refined definitions correlate more strongly with patient  
21  
22 expectations or functional data. Further research externally validating the classification using patient  
23  
24 groups, expert opinion<sup>54</sup> or functional data may demonstrate improved classification of those  
25  
26 responding to treatment in comparison to existing methods.  
27  
28

29  
30 It is clear the MLMs provide considerable advantages over existing approaches to identifying  
31  
32 patients who respond to a treatment. Consequently, the proportion of individuals thought not to be  
33  
34 responding to treatment may be smaller than previously thought. Using the redefined definition may  
35  
36 reduce the number of individuals misclassified as non-responders, and improve the prediction of  
37  
38 those individuals who are likely to respond to treatment.  
39  
40  
41  
42  
43  
44  
45  
46  
47  
48  
49  
50  
51  
52  
53  
54  
55  
56  
57  
58  
59  
60

**Abbreviations**

APEX – Arthroplasty Pain Experience

ICOAP - Intermittent and Constant Osteoarthritis Pain

MCID – Minimally Clinical Important Difference

MID – Minimal Important Difference

MLM – Multi Level Model

OO – OMERACT OARSI Criteria

RCI – Relative Change Index

RTN – Return To Normal

SD – Standard Deviation

SE – Standard Error

THR – Total Hip Replacement

TKR – Total Knee Replacement

**Acknowledgements**

We would like to thank Professor Fiona Steele for her extensive comments and help preparing this manuscript.

**Author Contributions**

Study Conception (AS). APEX study design (VW, RGH, AWB). APEX acquisition of data (VW, RGH, AWB, EL). ACHE study design (JD, DB, AP). Wrote first draft & revised manuscript (AS). Drafting and review of manuscript (AS, VW, RGH, AWB, EL, JD, DB, AP). Final approval of Manuscript (AS, VW, RGH, AWB, EL, JD, DB, AP)

**Funding Statement**

This work was supported by AS is funded by an MRC Fellowship MR/L01226X/1 and HTA Project:11/63/01 – ‘ACHE’. This article presents independent research funded by the National Institute for Health Research (NIHR) under its Programme Grants for Applied Research programme (RP-PG-0407-10070). The views expressed in this article are those of the authors and not necessarily those of the NHS, the NIHR or the Department of Health. The research team acknowledge the support of the NIHR, through the Comprehensive Clinical Research Network.

**Competing Interest**

The Authors have no competing interests to declare.

**Data Sharing**

No data is available to be shared.

## REFERENCES

1. Felson DT, Naimark A, Anderson J, et al. The prevalence of knee osteoarthritis in the elderly. The Framingham Osteoarthritis Study. *Arthritis and rheumatism* 1987;**30**(8):914-8.
2. Lawrence RC, Felson DT, Helmick CG, et al. Estimates of the prevalence of arthritis and other rheumatic conditions in the United States. Part II. *Arthritis and rheumatism* 2008;**58**(1):26-35.
3. National Joint Registry. *10th Annual Report 2013*. Hemel Hempstead, 2013.
4. Beswick AD, Wylde V, Gooberman-Hill R, et al. What proportion of patients report long-term pain after total hip or knee replacement for osteoarthritis? A systematic review of prospective studies in unselected patients. *Bmj Open* 2012;**2**(1).
5. Jeffery AE, Wylde V, Blom AW, et al. "It's there and I'm stuck with it": patients' experiences of chronic pain following total knee replacement surgery. *Arthritis care & research* 2011;**63**(2):286-92.
6. Kassam A, Dieppe P, Toms AD. An analysis of time and money spent on investigating painful Total Knee Replacements. *British Journal of Medical Practitioners* 2012;**5**(3).
7. Bellamy N, Buchanan WW, Goldsmith CH, et al. Validation study of WOMAC: a health status instrument for measuring clinically important patient relevant outcomes to antirheumatic drug therapy in patients with osteoarthritis of the hip or knee. *The Journal of rheumatology* 1988;**15**(12):1833-40.
8. Klassbo M, Larsson E, Mannevik E. Hip disability and osteoarthritis outcome score. An extension of the Western Ontario and McMaster Universities Osteoarthritis Index. *Scand J Rheumatol* 2003;**32**(1):46-51.
9. Roos EM, Roos HP, Lohmander LS, et al. Knee Injury and Osteoarthritis Outcome Score (KOOS)--development of a self-administered outcome measure. *J Orthop Sports Phys Ther* 1998;**28**(2):88-96.
10. Dawson J, Fitzpatrick R, Carr A, et al. Questionnaire on the perceptions of patients about total hip replacement. *J Bone Joint Surg Br* 1996;**78B**(2):185-90.
11. Dawson J, Fitzpatrick R, Murray D, et al. Questionnaire on the perceptions of patients about total knee replacement. *J Bone Joint Surg Br* 1998;**80B**(1):63-69.
12. Focht BC, Rejeski WJ, Ambrosius WT, et al. Exercise, self-efficacy, and mobility performance in overweight and obese older adults with knee osteoarthritis. *Arthritis and rheumatism* 2005;**53**(5):659-65.
13. Smith AJ, Dieppe P, Howard PW, et al. Failure rates of metal-on-metal hip resurfacings: analysis of data from the National Joint Registry for England and Wales. *Lancet* 2012;**380**(9855):1759-66.
14. Smith AJ, Dieppe P, Porter M, et al. Risk of cancer in first seven years after metal-on-metal hip replacement compared with other bearings and general population: linkage study between the National Joint Registry of England and Wales and hospital episode statistics. *Bmj* 2012;**344**:e2383.
15. Hunt LP, Ben-Shlomo Y, Clark EM, et al. 45-day mortality after 467 779 knee replacements for osteoarthritis from the National Joint Registry for England and Wales: an observational study. *Lancet* 2014.
16. Hunt LP, Ben-Shlomo Y, Clark EM, et al. 90-day mortality after 409,096 total hip replacements for osteoarthritis, from the National Joint Registry for England and Wales: a retrospective analysis. *Lancet* 2013;**382**(9898):1097-104.



17. Riddle DL, Stratford PW, Bowman DH. Findings of extensive variation in the types of outcome measures used in hip and knee replacement clinical trials: A systematic review. *Arthritis Rheum-Arthr* 2008;**59**(6):876-83.
18. Wylde V, Bruce J, Beswick A, et al. Assessment of chronic postsurgical pain after knee replacement: a systematic review. *Arthritis care & research* 2013;**65**(11):1795-803.
19. Wylde V, Blom AW. The failure of survivorship. *The Journal of bone and joint surgery British volume* 2011;**93**(5):569-70.
20. Darzi. High quality care for all: NHS Next Stage Review final report, 2008.
21. Hawker GA, Davis AM, French MR, et al. Development and preliminary psychometric testing of a new OA pain measure--an OARSI/OMERACT initiative. *Osteoarthritis and cartilage / OARS, Osteoarthritis Research Society* 2008;**16**(4):409-14.
22. Zigmond AS, Snaith RP. The hospital anxiety and depression scale. *Acta Psychiatr Scand* 1983;**67**(6):361-70.
23. Williams A, Kind P. The present state of play about QALYs. In: Hopkins A, ed. *Measure of the quality of life: the uses to which they may be put*: RCP publications 1992.
24. Christensen L, Mendoza JL. A Method of Assessing Change in a Single Subject - an Alteration of the Rc Index. *Behav Ther* 1986;**17**(3):305-08.
25. Guyatt GH, Osoba D, Wu AW, et al. Methods to explain the clinical significance of health status measures. *Mayo Clinic proceedings* 2002;**77**(4):371-83.
26. Jacobson NS, Roberts LJ, Berns SB, et al. Methods for defining and determining the clinical significance of treatment effects: description, application, and alternatives. *J Consult Clin Psychol* 1999;**67**(3):300-7.
27. Jacobson NS, Truax P. Clinical significance: a statistical approach to defining meaningful change in psychotherapy research. *Journal of consulting and clinical psychology* 1991;**59**(1):12-9.
28. Kvien TK, Heiberg T, Hagen KB. Minimal clinically important improvement/difference (MCII/MCID) and patient acceptable symptom state (PASS): what do these concepts mean? *Annals of the rheumatic diseases* 2007;**66** Suppl 3:iii40-1.
29. Maksymowych WP, Richardson R, Mallon C, et al. Evaluation and validation of the patient acceptable symptom state (PASS) in patients with ankylosing spondylitis. *Arthritis and rheumatism* 2007;**57**(1):133-9.
30. Norman GR, Sloan JA, Wyrwich KW. Interpretation of changes in health-related quality of life: the remarkable universality of half a standard deviation. *Med Care* 2003;**41**(5):582-92.
31. Norman GR, Sridhar FG, Guyatt GH, et al. Relation of distribution- and anchor-based approaches in interpretation of changes in health-related quality of life. *Medical care* 2001;**39**(10):1039-47.
32. Pham T, van der Heijde D, Altman RD, et al. OMERACT-OARSI initiative: Osteoarthritis Research Society International set of responder criteria for osteoarthritis clinical trials revisited. *Osteoarthritis and cartilage / OARS, Osteoarthritis Research Society* 2004;**12**(5):389-99.
33. Revicki D, Hays RD, Cella D, et al. Recommended methods for determining responsiveness and minimally important differences for patient-reported outcomes. *Journal of clinical epidemiology* 2008;**61**(2):102-9.
34. Tubach F, Ravaud P, Baron G, et al. Evaluation of clinically relevant changes in patient reported outcomes in knee and hip osteoarthritis: the minimal clinically important improvement. *Annals of the rheumatic diseases* 2005;**64**(1):29-33.
35. Tubach F, Ravaud P, Baron G, et al. Evaluation of clinically relevant states in patient reported outcomes in knee and hip osteoarthritis: the patient acceptable symptom state. *Annals of the rheumatic diseases* 2005;**64**(1):34-37.
36. Judge A, Cooper C, Williams S, et al. Patient-reported outcomes one year after primary hip replacement in a European Collaborative Cohort. *Arthritis care & research* 2010;**62**(4):480-8.

- 1  
2  
3 37. Wylde V, Gooberman-Hill R, Horwood J, et al. The effect of local anaesthetic wound infiltration  
4 on chronic pain after lower limb joint replacement: A protocol for a double-blind  
5 randomised controlled trial. *BMC Musculoskelet Disord* 2011;**12**:53.
- 6 38. Altman DG, Gore SM, Gardner MJ, et al. Statistical guidelines for contributors to medical  
7 journals. *British medical journal* 1983;**286**(6376):1489-93.
- 8 39. Sterne JA, Davey Smith G. Sifting the evidence-what's wrong with significance tests? *BMJ*  
9 2001;**322**(7280):226-31.
- 10 40. McConnell S, Kolopack P, Davis AM. The Western Ontario and McMaster Universities  
11 Osteoarthritis Index (WOMAC): A review of its utility and measurement properties. *Arthrit*  
12 *Rheum-Arthr* 2001;**45**(5):453-61.
- 13 41. Twisk J, Rijmen F. Longitudinal tobit regression: A new approach to analyze outcome variables  
14 with floor or ceiling effects. *Journal of clinical epidemiology* 2009;**62**(9):953-58.
- 15 42. Ram N, Grimm KJ. Growth mixture modeling: A method for identifying differences in longitudinal  
16 change among unobserved groups. *Int J Behav Dev* 2009;**33**(6):565-76.
- 17 43. Jones G, Lyons P. Approximate graphical methods for inverse regression. *Journal of Data Science*  
18 2009;**7**:61-72.
- 19 44. Snijders TAB, Bosker RJ. *Multilevel Analysis: An Introduction to Basic and Advanced Multilevel*  
20 *Modeling, second edition*. London: Sage Publishers, 2012.
- 21 45. Fieuws S, Verbeke G. Pairwise fitting of mixed models for the joint modeling of multivariate  
22 longitudinal profiles. *Biometrics* 2006;**62**(2):424-31.
- 23 46. Fieuws S, Verbeke G. Joint modelling of multivariate longitudinal profiles: pitfalls of the random-  
24 effects approach. *Statistics in medicine* 2004;**23**(20):3093-104.
- 25 47. Verbeke G, Molenberghs G. *Linear mixed models for longitudinal data*. USA: Springer, 2000.
- 26 48. Rasbash J, Steele F, Browne WJ, et al. *A user's guide to MLWIN*. UK, 2009.
- 27 49. Copas JB. Regression, Prediction and Shrinkage. *J R Stat Soc B* 1983;**45**(3):311-54.
- 28 50. Fitzmaurice GM, Laird NM, Ware JH. *Applied Longitudinal Analysis*. USA: Wiley, 2004.
- 29 51. Pan HQ, Goldstein H. Multi-level repeated measures growth modelling using extended spline  
30 functions. *Statistics in medicine* 1998;**17**(23):2755-70.
- 31 52. Rabe-Hesketh S, Skrondal A. Multilevel and latent variable modeling with composite links and  
32 exploded likelihoods. *Psychometrika* 2007;**72**(2):123-40.
- 33 53. Nagin DS, Odgers CL. Group-Based Trajectory Modeling in Clinical Research. *Annu Rev Clin*  
34 *Psycho* 2010;**6**:109-38.
- 35 54. Bellamy N, Crette S, Ford PM, et al. Osteoarthritis antirheumatic drug trials. III. Setting the delta  
36 for clinical trials--results of a consensus development (Delphi) exercise. *The Journal of*  
37 *rheumatology* 1992;**19**(3):451-7.
- 38  
39  
40  
41  
42  
43  
44  
45  
46  
47  
48  
49  
50  
51  
52  
53  
54  
55  
56  
57  
58  
59  
60

Table 1: Mean and standard deviation of baseline and change scores estimated using current and multi-level model approaches to responsiveness in patient undergoing total hip replacement in the APEX cohort study. Betas represent the population average characteristic and sigma the estimated standard deviation. Baseline is assumed to be the day of surgery, and change is from 0 to 3.6 months.

|                    | N   | Current Approaches to Responsiveness |               |           |               | Multi-Level Model Approaches to Responsiveness |          |           |               |           |               |                    |          |
|--------------------|-----|--------------------------------------|---------------|-----------|---------------|------------------------------------------------|----------|-----------|---------------|-----------|---------------|--------------------|----------|
|                    |     | Baseline                             |               | Change    |               | Absolute Threshold                             | P(Resp.) | Baseline  |               | Change    |               | Absolute Threshold | P(Resp.) |
|                    |     | $\beta_0$                            | $\sigma_{u0}$ | $\beta_1$ | $\sigma_{u1}$ |                                                |          | $\beta_0$ | $\sigma_{u0}$ | $\beta_1$ | $\sigma_{u1}$ |                    |          |
| Return to Normal   | 210 |                                      |               |           |               | 87.9                                           | 70.5     |           |               |           |               |                    |          |
| MID                | 210 | 43.71                                | (22.1)        | 45.76     | (24.0)        | 12.0                                           | 90.5     | 43.71     | (20.1)        | 46.14     | (19.7)        | 83.8               | 78.1     |
| MCID (Satisfied)   | 185 | 44.37                                | (22.0)        | 48.43     | (22.6)        |                                                |          | 44.37     | (20.3)        | 48.54     | (19.2)        |                    |          |
| MCID (UnSatisfied) | 25  | 38.77                                | (22.4)        | 26.05     | (25.4)        | 32.6                                           | 71.9     | 38.77     | (17.0)        | 28.43     | (16.3)        | 35.8               | 67.1     |
| Return to Normal   | 210 |                                      |               |           |               | 103.5                                          | 0.0      |           |               |           |               | 100.3              | 0.0      |
| MID                | 210 | 49.19                                | (27.2)        | 44.23     | (27.3)        | 13.6                                           | 84.3     | 49.19     | (25.6)        | 44.35     | (24.0)        | 12.0               | 88.6     |
| MCID (Satisfied)   | 185 | 50.08                                | (27.4)        | 46.37     | (26.7)        |                                                |          | 50.08     | (26.3)        | 46.21     | (24.5)        |                    |          |
| MCID (UnSatisfied) | 25  | 42.60                                | (24.8)        | 28.40     | (26.9)        | 30.0                                           | 72.4     | 42.60     | (18.3)        | 30.60     | (12.6)        | 31.0               | 73.3     |
| OO                 | 210 | 49.19                                | (27.2)        | 44.23     | (27.3)        | 20(10)                                         | 92.0     | 49.19     | (25.3)        | 44.35     | (23.4)        | 20(10)             | 99.5     |
| Return to Normal   | 210 |                                      |               |           |               | 82.5                                           | 70.0     |           |               |           |               | 76.5               | 80.5     |
| MID                | 210 | 39.13                                | (21.7)        | 47.06     | (26.5)        | 13.2                                           | 88.1     | 39.12     | (18.7)        | 47.66     | (20.5)        | 10.3               | 97.1     |
| MCID (Satisfied)   | 185 | 39.60                                | (21.7)        | 50.17     | (24.9)        |                                                |          | 39.60     | (19.2)        | 50.50     | (19.1)        |                    |          |
| MCID (UnSatisfied) | 25  | 35.58                                | (21.4)        | 24.08     | (26.6)        | 37.5                                           | 71.4     | 35.58     | (13.9)        | 26.69     | (17.1)        | 40.5               | 67.1     |
| OO                 | 210 | 39.13                                | (21.7)        | 47.06     | (26.5)        | 20(10)                                         | 92.0     | 39.12     | (18.5)        | 47.66     | (19.1)        | 20(10)             | 99.5     |

Table 2: Mean and standard deviation of baseline and change scores estimated using current and multi-level model approaches to responsiveness in patient undergoing total knee replacement in the APEX cohort study. Betas represent the population average characteristic and sigma the estimated standard deviation. Baseline is assumed to be the day of surgery, and change is from 0 to 3.6 months.

|                    | N   | Current Approaches to Responsiveness |               |           |               | Multi-Level Model Approaches to Responsiveness |          |           |               |           |               |                    |          |
|--------------------|-----|--------------------------------------|---------------|-----------|---------------|------------------------------------------------|----------|-----------|---------------|-----------|---------------|--------------------|----------|
|                    |     | Baseline                             |               | Change    |               | Absolute Threshold                             | P(Resp.) | Baseline  |               | Change    |               | Absolute Threshold | P(Resp.) |
|                    |     | $\beta_0$                            | $\sigma_{u0}$ | $\beta_1$ | $\sigma_{u1}$ |                                                |          | $\beta_0$ | $\sigma_{u0}$ | $\beta_1$ | $\sigma_{u1}$ |                    |          |
| Return to Normal   | 190 |                                      |               |           |               | 82.3                                           | 43.2     |           |               |           |               | 76.3               | 51.6     |
| MID                | 190 | 42.86                                | (19.7)        | 31.27     | (23.2)        | 11.6                                           | 76.3     | 42.89     | (16.7)        | 32.09     | (17.7)        | 8.9                | 93.2     |
| MCID (Satisfied)   | 138 | 44.09                                | (19.7)        | 38.51     | (20.6)        |                                                |          | 44.13     | (16.7)        | 38.76     | (14.7)        |                    |          |
| MCID (UnSatisfied) | 52  | 39.62                                | (19.7)        | 12.04     | (18.0)        | 22.7                                           | 62.6     | 39.62     | (16.3)        | 14.28     | (11.5)        | 29.9               | 55.3     |
| Return to Normal   | 190 |                                      |               |           |               | 94.9                                           | 44.7     |           |               |           |               | 88.7               | 36.8     |
| MID                | 190 | 47.76                                | (23.6)        | 31.61     | (25.5)        | 12.8                                           | 74.7     | 47.79     | (20.5)        | 32.46     | (19.5)        | 9.7                | 90.0     |
| MCID (Satisfied)   | 138 | 48.80                                | (23.4)        | 38.59     | (23.3)        |                                                |          | 48.88     | (20.5)        | 38.88     | (17.7)        |                    |          |
| MCID (UnSatisfied) | 52  | 45.00                                | (24.1)        | 13.08     | (21.9)        | 23.7                                           | 64.2     | 45.00     | (20.1)        | 15.26     | (13.3)        | 30.3               | 55.3     |
| OO                 | 190 | 47.76                                | (23.6)        | 31.61     | (25.5)        | 20(10)                                         | 78.9     | 47.78     | (20.2)        | 32.50     | (18.9)        | 20(10)             | 98.4     |
| Return to Normal   | 190 |                                      |               |           |               | 75.3                                           | 40.5     |           |               |           |               | 66.4               | 62.1     |
| MID                | 190 | 38.78                                | (18.2)        | 30.97     | (23.9)        | 12.0                                           | 78.4     | 38.80     | (13.8)        | 31.77     | (16.7)        | 8.3                | 94.2     |
| MCID (Satisfied)   | 138 | 40.15                                | (18.3)        | 38.45     | (21.2)        |                                                |          | 40.20     | (14.1)        | 38.63     | (12.8)        |                    |          |
| MCID (UnSatisfied) | 52  | 35.14                                | (17.8)        | 11.12     | (19.0)        | 24.8                                           | 61.6     | 35.14     | (12.8)        | 13.40     | (10.8)        | 31.2               | 54.7     |
| OO                 | 190 | 38.78                                | (18.2)        | 30.97     | (23.9)        | 20(10)                                         | 78.9     | 38.81     | (13.6)        | 31.74     | (15.7)        | 20(10)             | 98.4     |

```

1
2
3 *****
4 ***
5 * A unified multi-level model approach to assessing patient responsiveness
6 * including; return to normal, minimally important differences, and minimally
7 * clinical important differences for patient reported outcome measures.
8 *****
9 ***
10 *
11 * Sayers A*, Wylde V, Lenguerrand E, Gooberman-Hill R, Dawson J, Beard D,
12 * Price A, Blom AW
13 *
14 * 1. Musculoskeletal Research Unit, School of Clinical Sciences,
15 * University of Bristol, Southmead Hospital, Westbury On Trym,
16 * Bristol, BS10 5NB.
17 * 2. Nuffield Department of Population Health, University of Oxford,
18 * Old Road Campus, Headington, Oxford OX3 7LF, UK
19 * 3. Biomedical Research Unit, Nuffield Department of Orthopaedics,
20 * Rheumatology and Musculoskeletal Science, Nuffield
21 * Orthopaedic Centre,
22 * Windmill Road, Oxford, OX2 9JA
23 *
24 * Address for Correspondence
25 * Adrian Sayers, Musculoskeletal Research Unit, School of Clinical Sciences,
26 * University of Bristol, Learning and Research Building (Level 1),
27 * Southmead Hospital, Westbury on Trym, Bristol, BS10 5NB
28 *
29 * E-mail: adrian.sayers@bristol.ac.uk
30 * Tel: 44 (0)117 4147880; Fax + 44(0)117 414 7924
31 *****
32 ***
33 * Abstract
34 * Stata code to illustrate calculation of patient responsiveness using existing
35 * and multi-level model methods.
36 * Do file should be run completely inorder to simulate data from a linear
37 * model
38 * and perform calculations.
39 * File requires MLWin and copy of runmlwin downloaded for Stata.
40 *****
41 ***
42 * 1. Simulate a dataset
43 *****
44 {
45 * Design matrix in OO Format
46 set seed 111
47 clear
48 set obs 100
49
50 gen id= _n
51
52 * Set Parameters values
53 * Set Fixed Effect Parameters
54 local b0 = 49.19
55 local b1 = 44.35 / 3
56 local b2 = 39.12
57 local b3 = 47.66 / 3
58 * Set Random Effect Standard Deviations & Correlation Matrix
59 local u0 = 25.3
60

```

```

1
2
3         local u1 = 23.4 / 3
4             local u2 = 18.5
5                 local u3 = 19.1 / 3
6                     matrix u = (`u0', `u1', `u2', `u3')'
7                         matrix u_corr = (1      ,0.3 ,0.1
8 ,0.1 \  ///
9
10 0.3 ,1      ,0.1 ,0.1 \  ///
11
12 0.1 ,0.1 ,1      ,0.3 \  ///
13
14 0.1 ,0.1 ,0.3 ,1      )
15 * Draw Random Parameters
16     drawnorm u0 u1 u2 u3 , sds(u) corr(u_corr)
17
18 * Create 4 measurement occasions
19
20 expand 4
21 by id , sort : gen t = _n-1
22
23 * Prepare for a reshape into double long
24 gen _1=1
25     gen _2= 1
26         reshape long _ , i(id t) j(resp)
27             drop _
28
29 * Set error Standard Deviations & Correlation Matrix
30 local e1= 5
31     local e2= 5
32         matrix e = (`e1', `e2')'
33             matrix e_corr = (1      ,0.1 \  ///
34                             0.1 ,1
35 ) //
36
37         drawnorm e1 e2 , sds(e) corr(e_corr)
38
39 * Create response indicators for 00
40 gen w1 = 1 if resp==1
41     replace w1 = 0 if resp==2
42     gen w2 = 0 if resp==1
43     replace w2 = 1 if resp==2
44
45 * Generate a satisfaction indicator, uncorrelated with effects just for
46 illustration
47 gen x = cond(uniform()>=0.3,1,0) if resp==1 & t==1
48     by id : egen _x = min(x)
49         *Create dummy variables
50             gen x1 = 1 if _x==1
51                 replace x1 = 0 if _x==0
52                 gen x2 = 0 if _x==1
53                 replace x2 = 1 if
54 _x==0
55
56                                     drop x _x
57
58 * Predict response
59 gen y = (`b0' + u0)* w1 + (`b1' + u1)* w1 * t + e1* w1 + ///
60         (`b2' + u2)* w2 + (`b3' + u3)* w2 * t + e2* w2 //

```

```

1
2
3 tempfile simdata
4     save `simdata' , replace
5
6 }
7 *****
8 ***
9 * 2.1 Existing Methods (n.b. only for first response)
10 *****
11 ***
12 use `simdata' , clear
13     * Working with the first and last measurement occasion
14     keep if t ==0 | t==3
15     sort id resp t
16     by id resp : gen d_y = y[_n] - y[_n-1]
17 *****
18 * 2.1.1 Existing RTN
19 *****
20 {
21     sum y if t==0 & resp==1
22     local rtn = r(mean) + 2*r(sd)
23     by id resp: gen ex_rtn =cond(y>=`rtn',1 ,0) if
24     _n==2 & resp==1
25     by id resp: gen ex_rci = cond((d_y /
26     sqrt(2*(`r(sd)' * sqrt(1-0.9))^2))>=1.96,1,0) if _n==2 & resp==1
27     by id resp: gen ex_rtn_rci =
28     cond(ex_rtn==1 & ex_rci==1 ,1,0) if _n==2 & resp==1
29
30     tab ex_rtn if resp==1
31     tab ex_rci if resp==1
32     tab ex_rtn_rci if resp==1
33     // Number of individuals significant change & returning to normal
34     }
35 *****
36 * 2.1.2 Existing MID
37 *****
38 {
39     su d_y if resp==1
40     local mid = r(sd)*0.5
41     by id resp : gen ex_mid =cond(d_y>=`mid',1,0) if _n==2 &
42     resp==1
43     tab ex_mid if resp==1 // Number
44     of individuals with minimally important difference
45     }
46 *****
47 * 2.1.3 Existing MCID
48 * n.b using the 25th centile is pain is reverse coded.
49 *****
50 {
51     centile d_y if resp==1 & x1==1 , c(25)
52     local mcid = r(c_1)
53     by id resp: gen ex_mcid = cond(d_y>=`mcid',1,0) if _n==2 &
54     resp==1
55     tab ex_mcid if resp==1 // Number of
56     individuals meeting the MCID criteria
57     }
58
59
60

```

```

1
2
3 *****
4 * 2.1.4 Existing (OO) OMERACT-OARSI
5 *****
6 {
7 * 50% relative, 20% absolute single
8 * 20% relative, 10% absolute both
9
10 * Calculate Relative Change
11     by id resp: gen d_rely= (d_y/y[_n-1])*100
12     * Mark Single Changes
13     by id resp: gen ex_oo_single =1 if (d_y>=20 &
14 d_y<.) | (d_rely>=50 & d_rely<.) & _n==2
15     * Mark Double Changes
16     by id resp: gen ex_oo_double
17 =1 if (d_y>=10 & d_y<.) | (d_rely>=20 & d_rely<.) & _n==2
18     * Sum double changes
19     by id :
20 egen ex_oo_double_sum = total(ex_oo_double) if d_y!=.
21
22 * Mark OO criteria
23     by id : gen _ex_oo = cond(ex_oo_single==1 | ex_oo_double_sum==2 ,
24 1,0) if d_y!=.
25     by id : egen ex_oo = max(_ex_oo) if d_y!=.
26
27     tab ex_oo if resp==1          // Number of individuals
28 meeting the oo criteria
29 }
30 *****
31 ***
32 * 2.2 Multi-level Methods
33 *****
34 // Set the global macro to identify the location and version of mlwin
35 global MLwiN_path "C:\Program Files (x86)\MLwiN v2.32\i386\MLwiN.exe"
36 use `simdata' , clear
37 keep if resp==1
38
39 * Create a constant
40 gen cons=1
41
42 *****
43 * 2.2.1 MLM RTN / MID Model
44 *****
45 {
46 *
47 *
48 *
49 *
50 *
51 *
52 *
53 *
54 *
55 *
56 *
57 *
58 *
59 *
60 *

```



```

1
2
3
4 * Predict to asses responsiveness at (3month)
5 gen xb_t = (_b[cons]+_u0) + (_b[t]+_u1)*3
6
7 * RTN threshold
8 local mlm_rtn = _b[FP1:cons] + 2*( _b[RP2:var(cons)]^0.5)
9
10 * Mark RTN
11 gen mlm_rtn = cond(xb_t>=`mlm_rtn',1,0)
12
13 * Calculate RCI
14     gen xb_d = _b[FP1:t] + _u1
15     gen se_d = (_se[FP1:t]^2 + _ulse^2)^0.5
16     gen z_d = xb_d / se_d
17
18 * Mark RCI
19 gen mlm_rci = cond(z_d>=1.96,1,0)
20
21 * Mark RTN RCI composite
22 gen mlm_rtn_rci = cond(mlm_rtn==1 & mlm_rci==1, 1, 0)
23     egen pickone = tag(id)
24
25     tab mlm_rtn_rci if pickone==1 // Number of individuals
26 meeting the MLM RTN RCI criteria
27 }
28 *****
29 * 2.2.2 MLM MID
30 *****
31 {
32 * MID Threshold @ 3 months
33 local mlm_mid = 0.5*((_b[RP2:var(t)]*3)^0.5)
34     gen mlm_mid = cond( (_b[t]+_u1)*3>= `mlm_mid' ,1 ,0 )
35     tab mlm_mid if pickone==1 // Number of individuals meeting
36 the MLM MID criteria
37
38 * Drop previous residual and predictions
39 drop _u0 _u1 _u0se _ulse _e0 _e0se xb_fe xb_re xb xb_t xb_d se_d z_d
40 }
41 *****
42 * 2.2.3 MLM MCID
43 *****
44 {
45 * Stratify intercept and slope by satisfaction
46 gen consx1= cons*x1
47     gen consx2 = cons*x2
48     gen tx1 = t*x1
49     gen tx2 = t*x2
50
51 * Specify RE variance matrix
52 *
53     0-----1-----2
54     1,2,3,4,5,6,7,8,9,0,1,2,3,4,5,6,7,8,9,0,1
55 matrix u = (1,1,1,0,0,1,0,0,1,1)
56
57 * Specify RE variance matrix
58 *
59     0-----1-----2
60     1,2,3,4,5,6,7,8,9,0,1,2,3,4,5,6,7,8,9,0,1
61 matrix e = (1,0,1)
62
63 runmlwin y consx1 tx1 consx2 tx2 if resp==1 ,
64                                     /// Fixed effect

```

```

1
2
3         level1(t: consx1 consx2, elements(e)  residuals(_e, norecode ))
4             /// Level 1 variance
5             level2(id: consx1 tx1 consx2 tx2 ,elements(u)
6 residuals(_u, norecode ))      /// Level 2 variance
7             maxiterations(10)  corr sd nopause
8
9 Modelling options
10
11 * Estimate the Change  for all individuals
12 gen xb_slope = (_b[tx1]+_u1)*x1 + (_b[tx2]+_u3)*tx2
13
14 * Find the 75th (inverse coding 25th) centile of those satisfied
15 centile xb_slope if tx1==3 , c(25)
16     local mlm_mcid = r(c_1)
17
18 *tag observations which have improvements greater than mcid
19     gen mlm_mcid = cond(xb_slope>=`mlm_mcid',1,0) if t==3
20     tab mlm_mcid if t==3 // Number of individuals meeting the
21 MCID  criteria
22     }
23 *****
24 * 2.2.4 MLM (OO) OMERACT-OARSI
25 *****
26 {
27 * 50% relative, 20 absolute single assuming a 0-100 score
28 * 20% relative, 10 absolute both assuming a 0-100 score
29 use `simdata' , clear
30     sort id t resp
31
32 * Create response indicators
33 gen cons =1
34     gen consw1 = cons*w1
35     gen consw2 = cons*w2
36     gen tw1 = t*w1
37     gen tw2 = t*w2
38
39 runmlwin y  consw1 tw1 consw2  tw2 ,
40             /// Fixed Effect
41             level1(resp:)
42
43             /// Level
44 1 variance
45     level2(t: consw1 consw2,  residuals(_e, norecode ))
46     /// Level 2 variance
47     level3(id: consw1 tw1 consw2 tw2 , residuals(_u, norecode
48 ))      /// Level 3 variance
49     maxiterations(10)  corr sd nopause
50     /// Modelling options
51
52 * Calculate predicted changes
53 gen mlm_d = (_b[tw1] + _u1 )*tw1 + (_b[tw2] + _u3 )*tw2
54     gen mlm_bl = (_b[consw1] + _u0)*consw1 + (_b[consw2] + _u2)*consw2
55     gen mlm_relyd= (mlm_d /mlm_bl)*100
56
57 * Mark out responders
58     by id resp ,sort: gen mlm_oo_single =1 if ((
59 mlm_d>=20 & mlm_d<.) | (mlm_relyd>=50 & mlm_relyd<.) ) & t==3
60     * Mark Double Changes
61     by id resp ,sort: gen
62 mlm_oo_double =1 if ((mlm_d>=10 & mlm_d<.) | (mlm_relyd>=20 & mlm_relyd<.) ) &

```

```
1
2
3 t==3
4
5                                     * Sum double changes
6                                     by id
7 ,sort : egen mlm_oo_double_sum = total(mlm_oo_double) if t==3
8
9 * Mark 00 criteria
10 by id : gen _mlm_oo = cond(mlm_oo_single==1 | mlm_oo_double_sum==2 , 1,0) if
11 t==3
12     by id : egen mlm_oo = max(_mlm_oo) if t==3
13
14     tab mlm_oo if resp==1           // Number of individuals
15 meeting the MLM 00 criteria
16 }
17
18
19
20
21
22
23
24
25
26
27
28
29
30
31
32
33
34
35
36
37
38
39
40
41
42
43
44
45
46
47
48
49
50
51
52
53
54
55
56
57
58
59
60
```

# BMJ Open

**A unified multi-level model approach to assessing patient responsiveness including; return to normal, minimally important differences, and minimal clinical important improvement for patient reported outcome measures.**

|                                 |                                                                                                                                                                                                                                                                                                                                                                                                                                                                                                                                                                                                                                                                                                                                         |
|---------------------------------|-----------------------------------------------------------------------------------------------------------------------------------------------------------------------------------------------------------------------------------------------------------------------------------------------------------------------------------------------------------------------------------------------------------------------------------------------------------------------------------------------------------------------------------------------------------------------------------------------------------------------------------------------------------------------------------------------------------------------------------------|
| Journal:                        | <i>BMJ Open</i>                                                                                                                                                                                                                                                                                                                                                                                                                                                                                                                                                                                                                                                                                                                         |
| Manuscript ID                   | bmjopen-2016-014041.R1                                                                                                                                                                                                                                                                                                                                                                                                                                                                                                                                                                                                                                                                                                                  |
| Article Type:                   | Research                                                                                                                                                                                                                                                                                                                                                                                                                                                                                                                                                                                                                                                                                                                                |
| Date Submitted by the Author:   | 21-Mar-2017                                                                                                                                                                                                                                                                                                                                                                                                                                                                                                                                                                                                                                                                                                                             |
| Complete List of Authors:       | Sayers, Adrian; University of Bristol, Musculoskeletal Research Unit<br>Wylde, Vikki; University of Bristol, School of Clinical Sciences<br>Lenguerrand, Erik; University of Bristol School of Clinical Science, School of Clinical Sciences, Musculoskeletal Research Unit<br>Goberman-Hill, Rachael; University of Bristol, School of Clinical Sciences<br>Dawson, Jill; University of Oxford, Department of Public Health<br>Beard, David; University of Oxford, Nuffield Dept of Orthopaedics, Rheumatology and Musculoskeletal Sciences<br>Price, Andrew; University of Oxford, Nuffield Department of Orthopaedics, Rheumatology and Musculoskeletal Sciences<br>Blom, Ashley; University of Bristol, School of Clinical Sciences |
| <b>Primary Subject Heading</b>: | Research methods                                                                                                                                                                                                                                                                                                                                                                                                                                                                                                                                                                                                                                                                                                                        |
| Secondary Subject Heading:      | Rheumatology, Epidemiology, Patient-centred medicine                                                                                                                                                                                                                                                                                                                                                                                                                                                                                                                                                                                                                                                                                    |
| Keywords:                       | Patient Responsiveness, Multi-level Modelling, Return To Normal, Minimal Important Difference, Patient-reported outcomes, Minimal clinical important improvement                                                                                                                                                                                                                                                                                                                                                                                                                                                                                                                                                                        |
|                                 |                                                                                                                                                                                                                                                                                                                                                                                                                                                                                                                                                                                                                                                                                                                                         |

SCHOLARONE™  
Manuscripts

1  
2  
3 **A unified multi-level model approach to assessing patient responsiveness including; return to**  
4 **normal, minimally important differences, and minimal clinical important improvement for patient**  
5 **reported outcome measures.**  
6  
7  
8  
9

10 Sayers A<sup>1,2</sup>, Wylde V<sup>1</sup>, Lenguerrand E<sup>1</sup>, Gooberman-Hill R<sup>1</sup>, Dawson J<sup>3</sup>, Beard D<sup>4</sup>, Price A<sup>4</sup>, Blom AW<sup>1</sup>  
11

12  
13 Address for Correspondence  
14

15  
16 Adrian Sayers, Musculoskeletal Research Unit, School of Clinical Sciences, University of Bristol,  
17  
18 Learning and Research Building (Level 1), Southmead Hospital, Westbury on Trym, Bristol, BS10 5NB  
19

20  
21 E-mail: [adrian.sayers@bristol.ac.uk](mailto:adrian.sayers@bristol.ac.uk)  
22

23  
24 Tel: 44 (0)117 4147880; Fax + 44(0)117 414 7924  
25

- 26  
27  
28  
29  
30  
31  
32  
33  
34  
35  
36  
37  
38  
39  
40  
41  
42  
43  
44
1. Musculoskeletal Research Unit, School of Clinical Sciences, University of Bristol, Southmead Hospital, Westbury On Trym, Bristol, BS10 5NB (AS, VW, EL, RGH, AWB).
  2. School of Social and Community Medicine, University of Bristol, 39 Whatley Road, Bristol, BS8 2PS.
  3. Nuffield Department of Population Health, University of Oxford, Old Road Campus, Headington, Oxford OX3 7LF, UK (DB, AP).
  4. Biomedical Research Unit, Nuffield Department of Orthopaedics, Rheumatology and Musculoskeletal Science, Nuffield Orthopaedic Centre, Windmill Road, Oxford, OX2 9JA (JD).

45  
46 Word Count 4010  
47  
48  
49  
50

51  
52 Keywords: Patient Responsiveness, Multi-level Modelling, Return To Normal , Minimal Important  
53  
54 Difference, Minimal Clinically Important Difference, Patient-reported outcomes, Clinical significance  
55  
56 Anchor-based methods; Distribution based methods  
57  
58  
59  
60

**Abstract (271 Words)**

## Objective

This article reviews and compares four commonly used approaches to assess patient responsiveness to a treatment or therapy [Return To Normal (RTN), Minimal Important Difference (MID), Minimal Clinically Important Improvement (MCII), OMERACT-OARSI (OO)], and demonstrates how each of the methods can be formulated in a multi-level modelling (MLM) framework.

## Design

## Cohort Study

## Setting

A cohort of patients undergoing total hip and knee replacement were recruited from a single UK NHS hospital.

## Population

400 Patients from The Arthroplasty Pain Experience (APEX) cohort study undergoing total hip (n=210) and knee (n=190) replacement who completed the Intermittent and Constant Osteoarthritis Pain (ICOAP) questionnaire prior to surgery and then at 3, 6 and 12 months after surgery.

## Primary Outcomes

The primary outcome was defined as response to treatment following total hip or knee replacement. We compared baseline scores, change scores, and proportion of individuals defined as “responders” using traditional and MLM approaches to patient responsiveness.

## Results

Using existing approaches, baseline and change scores are underestimated, and the variance of baseline and change scores overestimated in comparison to MLM approaches. MLM increases the proportion of individuals defined as responding in RTN, MID, and OO criteria compared to existing approaches. Using MLM with the MCII criteria reduces the number of individuals identified as responders.

## Conclusion

1  
2  
3  
4  
5  
6  
7  
8  
9  
10  
11  
12  
13  
14  
15  
16  
17  
18  
19  
20  
21  
22  
23  
24  
25  
26  
27  
28  
29  
30  
31  
32  
33  
34  
35  
36  
37  
38  
39  
40  
41  
42  
43  
44  
45  
46  
47  
48  
49  
50  
51  
52  
53  
54  
55  
56  
57  
58  
59  
60

MLM improves the estimation of the standard deviation of baseline and change scores by explicitly incorporating measurement error into the model, and avoiding regression to the mean when making individual predictions. Using refined definitions of responsiveness may lead to a reduction in misclassification when attempting to predict who does and does not respond to an intervention, and clarifies the similarities between existing methods.

For peer review only

## Article Summary

### Strengths and limitations of this study

- Four different approaches to patient responsiveness can be unified into a multi-level modelling.
- A multi-level model framework of patient responsiveness highlights the similarities and differences between existing methods.
- Multi-level models provide a simple framework which incorporates measurement error and non-linear change in trajectories of patient recovery.
- Multi-level models are technically more demanding than existing formulations of patient responsiveness, and convergence is not guaranteed.
- Multi-level models does not improve the arbitrary placement of the thresholds that define responsiveness in comparison to existing methods



## INTRODUCTION

Joint replacement is an increasingly common elective procedure worldwide<sup>1-3</sup> and improving patient reported outcomes after joint replacement is a key research priority due to high prevalence of poor outcomes after joint arthroplasty.<sup>4</sup> Poor outcomes include continuing pain, functional limitations,<sup>5</sup> and increased healthcare utilisation.<sup>6</sup> However, there is some debate on how the efficacy of interventions can be judged due to the variety of different outcomes used in orthopaedic research.<sup>7-18</sup> Traditionally, objective primary outcomes such as prosthetic survivorship and mortality rates were used.<sup>19</sup> However, more recently there has been a shift in focus which ensures that patients' perspective is central to assessment of intervention success.<sup>20</sup> Many studies now use patient reported outcome measures (PROMs) as endpoints, and these tools can assess a variety of health outcomes, including pain,<sup>7,21</sup> physical functioning,<sup>7</sup> mental well-being<sup>22</sup> and health-related quality of life.<sup>23</sup>

Although PROMs are widely used,<sup>4</sup> there is still debate in how the results should be interpreted and how to define a clinically meaningful change.<sup>24-35</sup> From a measurement perspective, the ability to estimate if a change has occurred depends on the application of an appropriate statistical model. From a clinical perspective, some authors suggest that the average statistical change is insufficient to "tell you anything about an individual's chances of improving".<sup>36</sup> Therefore, the utility of simple statistical analyses are limited when attempting to help patients weigh up the risks and benefits of undergoing surgery.

In order to supplement simple statistical analysis, many researchers attempt to dichotomise the population into those who have or have not responded to an intervention, creating a two-stage process of defining an outcome. There are a number of different methods (definitions) that can be used to dichotomise the population, and these secondary analyses are collectively referred to as responsiveness analyses.<sup>36</sup> Four substantively different methods of estimating the proportion of individuals who respond to an intervention have been previously identified in orthopaedic

1  
2  
3 research:<sup>36</sup> 1) Return to Normal (RTN), 2) Distribution-based Minimally Important Difference (MID),  
4  
5 3) Anchor-based Minimal Clinically Important Difference (MCII), and 4) the OMERACT-OARSI (OO)  
6  
7 responder criteria. The first three approaches are generic and used in many fields of health research,  
8  
9 whereas the fourth approach is specific to orthopaedic research, but in principle could be used in  
10  
11 many fields of health research.  
12

13  
14 Each of these approaches is often thought to be methodologically distinct. However, all of the  
15  
16 methods can be shown to be special cases of a multi-level model (MLM). MLM have been used in a  
17  
18 wide variety of contexts ranging from growth modelling to modelling educational data. One of the  
19  
20 principal reasons to use MLM is to take advantage of the direct estimation of different variance  
21  
22 components<sup>37</sup>, and provide efficient and unbiased estimates of fixed and random effects.<sup>38</sup>  
23  
24

25  
26 Despite a number of extensive reviews of patient responsiveness,<sup>31 33 39 40</sup> we will describe these four  
27  
28 approaches to calculating responsiveness and highlight the substantively different decisions each  
29  
30 method makes. We will then describe how each approach can be translated into a MLM framework,  
31  
32 emphasising the benefits of the translation, and contrast the approaches using an example from the  
33  
34 APEX cohort study.<sup>41</sup>  
35  
36  
37  
38  
39  
40  
41  
42  
43  
44  
45  
46  
47  
48  
49  
50  
51  
52  
53  
54  
55  
56  
57  
58  
59  
60

## METHODS

We outline the four existing approaches to patient responsiveness previously used in orthopaedic research<sup>36</sup>, and describe their potential limitations, and how they can be formulated in a MLM framework.

### Review of existing approaches to responsiveness

Return to normal (RTN)<sup>26</sup> suggests that an individual has returned to 'normal' if their score on a post-intervention outcome is greater than two standard deviations (SD) from the mean baseline response.

The use of two standard deviations appears to be justified on theoretical grounds, however it is quite arbitrary. Assuming scores are normally distributed and measured without error, two SD's corresponds to a 95.5% prediction interval for the mean, which is similar to the equally arbitrary and much criticised significance threshold  $p=0.05$  (Type I error=0.05) criterion used throughout medical research<sup>42 43</sup>. However, there is no reason why a 1.6 or a 2.6 SD cut-offs should not be used in preference, which correspond to 90% and 99% prediction intervals.

The method also assumes the observed change is unlikely to be due to chance alone and does not account for any uncertainty. In order to alleviate this problem the use of the Relative Change Index (RCI) was proposed to be used in conjunction with the RTN classification.<sup>24 27</sup> The RCI constructs a test of the individual's score at follow up compared to their baseline, where the standard error of the difference is estimated indirectly using the SD of the baseline score and an assumed reliability coefficient from empirical research or a range of reliability values in the spirit of a sensitivity analysis.

A commonly described distribution-based Minimally Important Difference (MID) method classifies individuals as responders if their observed change is greater than a fixed proportion of the SD of the pre-surgery score.<sup>30</sup> There has been much debate about the exact size, or proportion, of the SD change score to use, however 0.5 SD's has been reported widely and suggested to be a difference

1  
2  
3 that is minimally perceptible to patients.<sup>30</sup> Any individual with a change score greater than 0.5 SD of  
4  
5 the baseline score is defined as responding to the treatment. Similar to the RTN criteria, the decision  
6  
7 to use 0.5 is arbitrary and there is no reason why more or less stringent criteria of 0.25, 1 or 2 SD's  
8  
9 could not be used. Additionally, there is no reason why a test such as the RCI should not be  
10  
11 conducted to check that change is beyond the bounds of measurement error.  
12

13  
14 Anchor-based Minimal Clinically Important Improvement (MCII) is similar to the MID approach, in  
15  
16 that it defines an individual as a responder based on their individual change score. However, the cut-  
17  
18 point is determined in individuals who report themselves as having an outcome which is either  
19  
20 good/satisfactory or perceived as improved from baseline using an external anchoring question. The  
21  
22 authors proposed using a cut point at the 75th centile of the change score, in those who are  
23  
24 satisfied.<sup>34</sup> Therefore any individuals, whether they are satisfied or not, who has a change score  
25  
26 greater than the 75th centile are defined as responders. A closely related anchor-based metric is the  
27  
28 Patient Acceptable Symptom State (PASS),<sup>35</sup> the construction is similar to that of the MCII with the  
29  
30 exception that it is based on the final score of patients opposed to change. Conceptually the PASS is  
31  
32 more closely related to the RTN definition of responsiveness, and much of the criticism levied  
33  
34 against MCII and RTN can therefore be applied to the PASS.  
35  
36  
37  
38

39 The OMERACT-OARSI (OO) criteria<sup>32</sup> recognises that a response to an intervention may occur in one  
40  
41 or more different measured outcomes, i.e. a multivariate response mechanism. In keeping with  
42  
43 much of the orthopaedic literature they assume the proposed score has been rescaled between 0  
44  
45 and 100<sup>32</sup>, and that a responder is defined as any individual with 1. a  $\geq 50\%$  relative change or a  
46  
47  $\geq 20$  point absolute change on one or more responses scales, or 2. a  $\geq 20\%$  relative change or  $\geq 10$   
48  
49 point absolute change in two or more response scales. Relative change is defined as the ratio of the  
50  
51 change to the individual baseline score multiplied by 100. Unlike the RTN, MID, or MCII it is very  
52  
53 clear that the thresholds for relative and absolute changes are based on a panel of expert opinions  
54  
55 and are fixed.  
56  
57  
58  
59  
60

1  
2  
3 Despite the variety of existing approaches used to identifying responders there are a number of  
4  
5 problems common to all methods. Common assumptions include: 1) Each observed outcome is  
6  
7 measured without error and reflects the true underlying patients response, test-retest reliability  
8  
9 studies indicate that this is not a realistic assumption.<sup>44</sup> 2) Regression to the mean does not occur  
10  
11 and therefore the variance of the change score will not be overestimated. 3) Floor and ceiling effects  
12  
13 do not bias estimates of the variance of the change score.<sup>45</sup>  
14  
15

16  
17 Furthermore in RTN, specific combinations of means and variances may result in a threshold beyond  
18  
19 the range of the measurement tool, therefore no individuals would be defined as responding to a  
20  
21 therapy. The MCII approach assumes the additional anchoring variable is measured without error  
22  
23 and the response trajectory is distinct from those who are unsatisfied.<sup>46</sup> The method also assumes a  
24  
25 two parameter logistic function is an appropriate model for the cumulative proportional rank of  
26  
27 patients and change in outcome, and that there is no uncertainty in the calculation of the threshold  
28  
29 .<sup>47</sup> Finally, the OO approach considers a response in two or more outcomes. However, it does not  
30  
31 explicitly describe how the correlation between the two outcomes is accounted for, and fails to  
32  
33 recognise that if not modelled appropriately may introduce bias.<sup>48-50</sup>  
34  
35

36  
37 The four methods identified have a number of other limitations,<sup>25</sup> but they are difficult to compare  
38  
39 methods when presented as distinct approaches.  
40

41  
42 Embedding them in a unified statistical framework makes their underlying assumptions explicit,  
43  
44 whilst highlighting their similarities and differences. In addition, it provides a framework to  
45  
46 incorporate non-linear change, measurement error, and variability in the timing of measurement  
47  
48 occasions, all of which are to be expected in real word data collections and are critical when  
49  
50 attempting to asses a patients change at a specified point in time.  
51

52  
53  
54 Multi-level modelling approach to responsiveness  
55  
56  
57  
58  
59  
60

We now present a general multi-level model for patient responsiveness and show how the four approaches described above can be specified as special cases.

Under the assumption of linear change, the measured response ( $y$ ) at the  $i^{\text{th}}$  occasion for the  $j^{\text{th}}$  individual is modelled as a linear function of time.

Equation 1

$$y_{ij} = \beta_0 + u_{0j} + (\beta_1 + u_{1j})t_{ij} + \varepsilon_{ij}$$

$$\begin{bmatrix} u_{0j} \\ u_{1j} \end{bmatrix} \sim N(0, \Omega_u), \quad \Omega_u = \begin{bmatrix} \sigma_{u0}^2 & \\ \sigma_{u01} & \sigma_{u1}^2 \end{bmatrix}$$

$$[\varepsilon_{ij}] \sim N(0, \sigma_{\varepsilon}^2)$$

where  $t_{ij}$  is the time at which measurement  $i$  was taken on individual  $j$ , coded as zero at baseline.  $\beta_0$  is the baseline population average response, and  $u_{0j}$  represents the  $j^{\text{th}}$  individual difference from the baseline response. The sum of  $\beta_0 + u_{0j}$  is the estimated individual baseline response.  $\beta_1$  represents the population average change per unit increase in time, and  $u_{1j}$  represents the  $j^{\text{th}}$  individual difference from the population average change per unit increase in time. The sum of  $\beta_1 + u_{1j}$  is the estimated individual average change per unit increase in time. Measurement error in the linear trajectory is represented by  $\varepsilon_{ij}$ .

The variance in individual deviations from the population average response at baseline and average rate of change are  $\sigma_{u0}^2$  and  $\sigma_{u1}^2$  respectively. Furthermore, the correlation between baseline measurements and rate of change can be assumed to be independent or correlated by constraining  $\sigma_{u01}$  to be zero or allowing it to be freely estimated. The variances of the shrunken residuals  $\hat{u}_{0j}$  and  $\hat{u}_{1j}$ , also known as empirical bayes estimates, are typically less than the estimated population variances  $\hat{\sigma}_{u0}^2$  and  $\hat{\sigma}_{u1}^2$  as they shrink towards the population averages of  $\beta_0$  and  $\beta_1$ . The extent of the shrinkage depends on the number of measurement occasions and the within individual

1  
2  
3 variability, with greater shrinkage as the number of measurement occasions decrease and as the  
4  
5 within individual variance increases. A more detailed discussion of MLM can be found in most  
6  
7 advanced statistics textbooks.<sup>48 51 52</sup>  
8  
9

10  
11  
12  
13 We now describe how the four traditional approaches to measuring patient responsiveness can be  
14  
15 unified into a MLM framework. General benefits of the MLM over existing approaches include: 1)  
16  
17 with more than three measurement occasions a MLM directly allows for measurement error,  $\varepsilon_{ij}$ ; 2)  
18  
19 the use of shrunken residuals  $\widehat{u}_{0j}$  and  $\widehat{u}_{1j}$  allow for regression to the mean when predicting an  
20  
21 individual's score<sup>53</sup>; 3) MLM can be extended to include multivariate response models which  
22  
23 appropriately model the correlation between two or more outcomes; and 4) MLM allows for  
24  
25 variability in the timing of measurement occasions. Fundamentally, the MLM approach recognises  
26  
27 that observed patient responses are subject to error, and therefore the true patient's response  
28  
29 following an intervention must be estimated.  
30  
31  
32

33  
34 *MLM-Return To Normal.* In order to apply the RTN criteria using a MLM approach we first estimate  
35  
36 the baseline population SD in individuals considered to be abnormal using the model described in  
37  
38 Equation 1. Assuming  $y_{ij}$  is normally distributed at baseline with a population mean  $\beta_0$  and variance  
39  
40  $\sigma_{u0}^2$  a  $100 \cdot \left(1 - \frac{\alpha}{2}\right)$  prediction interval for the baseline measurement can be constructed i.e.  
41  
42  $\left[\beta_0 - \sigma_{u0}z_{\left(1-\frac{\alpha}{2}\right)}, \beta_0 + \sigma_{u0}z_{\left(1-\frac{\alpha}{2}\right)}\right]$  where  $\alpha$  is the type I error rate and  $z$  is the critical value from a  
43  
44 standard normal distribution. Importantly  $y_{ij}$  is not assumed to be measured without error and  
45  
46 therefore estimates of  $\sigma_{u0}^2$  are less likely to be biased than using simple methods. However, it is  
47  
48 important to note that the choice of  $\alpha$  is entirely that of the researcher, and whilst  $\alpha = 0.05$  (leading  
49  
50 to  $z = 1.96 \approx 2$ ) is common, more or less stringent criteria could be applied.  
51  
52  
53  
54

55  
56 The second step is to estimate the score of the individual at time  $j$  following surgery and determine if  
57  
58 it is within the baseline prediction interval. This prediction is simply calculated by substituting  
59  
60

estimates of  $\beta_0$ ,  $\beta_1$ ,  $u_{0j}$  and  $u_{1j}$  into Equation 1, to give the empirical best linear unbiased prediction (eBLUP) for the  $j^{\text{th}}$  individual at the  $i^{\text{th}}$  occasion.<sup>54</sup>

Finally, in order to determine whether or not the response of the individual following surgery is greater than one would attribute to chance alone, i.e. the null hypothesis that the  $j^{\text{th}}$  individuals slope is not equal to zero, a test statistic similar to RCI should be conducted,

$$(\hat{\beta}_1 + \hat{u}_{1j})/SE(\hat{\beta}_1 + \hat{u}_{1j}), \text{ where } SE(\hat{\beta}_1 + \hat{u}_{1j}) = \sqrt{VAR(\hat{\beta}_1) + VAR(\hat{u}_{1j})}.$$

*MLM-Minimally Important Difference.* The threshold of minimally important difference can also be estimated using a MLM. Similar to RTN, a linear model of change is applied, as in Equation 1. Then the population SD of the baseline response is estimated by  $\sigma_{u0}$ . By comparing the estimated change for the  $j^{\text{th}}$  individual  $(\hat{\beta}_1 + \hat{u}_{1j})t$  to the baseline standard deviation, i.e.  $\sigma_{u0}/2$ , the individual can be classed as a responder or not. The MID approach does not specifically state whether a test of whether an individual's change scores is less than the MID threshold should be conducted, but a test

statistic is simply constructed as  $\left( (\hat{\beta}_1 + \hat{u}_{1j})t - \left( \frac{\sigma_{u0}}{2} \right) \right) / (SE(\hat{\beta}_1 + \hat{u}_{1j})t)$ .

*MLM-Minimally Clinically Important Improvement.* The MLM MCII requires a simple extension of the univariate model presented previously (Equation 1). The outcome of interest is stratified using an external criterion. The stratification is achieved by creating dummy variables for those who are un/satisfied with some aspect of their treatment i.e.  $x_{1i}$  takes the values 0 and 1 representing unsatisfied and satisfied individuals respectively, and  $x_{2i} = 1 - x_{1i}$ . These dummy variables are then included as additional explanatory variables, with no overall model intercept, and interacted with  $t$ .

Equation 2

$$y_{ij} = (\beta_0 + u_{0j})x_{1i} + (\beta_1 + u_{1j})t_{ij}x_{1i} + \varepsilon_{1ij}x_{1i} \\ + (\beta_2 + u_{2j})x_{2i} + (\beta_3 + u_{3j})t_{ij}x_{2i} + \varepsilon_{2ij}x_{2i}$$



$$\begin{bmatrix} u_{0j} \\ u_{1j} \\ u_{2j} \\ u_{3j} \end{bmatrix} \sim N(0, \Omega_u): \quad \Omega_u = \begin{bmatrix} \sigma_{u0}^2 & & & \\ \sigma_{u01} & \sigma_{u1}^2 & & \\ 0 & 0 & \sigma_{u2}^2 & \\ 0 & 0 & \sigma_{u23} & \sigma_{u3}^2 \end{bmatrix}$$

$$\begin{bmatrix} \varepsilon_{1ij} \\ \varepsilon_{2ij} \end{bmatrix} \sim N(0, \Omega_\varepsilon): \quad \Omega_\varepsilon = \begin{bmatrix} \sigma_{\varepsilon1}^2 & \\ 0 & \sigma_{\varepsilon2}^2 \end{bmatrix}$$

Therefore  $\beta_0$  and  $\beta_2$  are the mean population outcome score at baseline for those who are satisfied and unsatisfied respectively, and  $\beta_1$  and  $\beta_3$  are the corresponding mean population changes per unit of time. Variances and covariances are similarly interpreted for those who are satisfied and unsatisfied respectively. However, that satisfaction on the external anchoring question is assumed to be known without error, and individual effects and errors for  $x_{1i}$  are uncorrelated with those for  $x_{2i}$  because the satisfied and unsatisfied categories are mutually exclusive. Whether or not it is desirable to fit a model to both satisfied and unsatisfied individuals simultaneously is debateable, as only those who are satisfied contribute to the definition of MCII. However, we present a simultaneous modelling approach to satisfied and unsatisfied individuals as it make the underlying modelling assumptions explicit. Furthermore, if the stratification on satisfaction status leads to a small samples alternative estimators and degree of freedom can be used in a MLM framework to account for this i.e. restricted maximum likelihood, restricted generalised least squares, or adjustments to the denominator degrees of freedom.<sup>55</sup>

Following prediction of each individual's trajectory, including those unsatisfied with treatment, the second stage in the MCII method requires a threshold for determining responsiveness. Using a similar suggestion to Tubach et al.,<sup>35</sup> the 75<sup>th</sup> centile of those who are satisfied could be used to classify all individuals as responding or not. Similar to the MID there is no suggestion of whether a

test against the null value of the 75<sup>th</sup> centile should be constructed, but this is easily done within the MLM framework.

*MLM-OMERACT-OARSI criteria.* The OO criteria can be similarly extended into a multi-variate MLM framework by the inclusion of dummy variables and reshaping into a “double” long format with both responses stored in a single vector. Figure 1 illustrates the data structure for a bivariate model.

Dummy variables, also known as response indicators, are used to denote the response options:  $w_{1i}$  is coded 1 for the first measurement outcome (pain) and 0 for the second outcome (function), and  $w_{2i} = 1 - w_{1i}$ . The response indicators and their interactions with  $t$  are included as explanatory variables to obtain the following bivariate response model.

Equation 3

$$y_{ij} = (\beta_0 + u_{0j})w_{1i} + (\beta_1 + u_{1j})t_{ij}w_{1i} + \varepsilon_{1ij}w_{1i} \\ + (\beta_2 + u_{2j})w_{2i} + (\beta_3 + u_{3j})t_{ij}w_{2i} + \varepsilon_{2ij}w_{2i}$$

$$\begin{bmatrix} u_{0j} \\ u_{1j} \\ u_{2j} \\ u_{3j} \end{bmatrix} \sim N(0, \Omega_u): \quad \Omega_u = \begin{bmatrix} \sigma_{u0}^2 & & & \\ \sigma_{u01} & \sigma_{u1}^2 & & \\ \sigma_{u02} & \sigma_{u12} & \sigma_{u2}^2 & \\ \sigma_{u03} & \sigma_{u13} & \sigma_{u23} & \sigma_{u3}^2 \end{bmatrix}$$

$$\begin{bmatrix} \varepsilon_{1ij} \\ \varepsilon_{2ij} \end{bmatrix} \sim N(0, \Omega_\varepsilon): \quad \Omega_\varepsilon = \begin{bmatrix} \sigma_{\varepsilon1}^2 & \\ \sigma_{\varepsilon12} & \sigma_{\varepsilon2}^2 \end{bmatrix}$$

With a similar functional form to the univariate MLM, there are separate population and individual intercepts for the first and second outcome ( $\beta_0, \beta_2$  and  $u_{0j}, u_{2j}$  respectively), and separate population and individual slopes are estimated for the second outcome ( $\beta_1, \beta_3$  and  $u_{1j}, u_{3j}$ ).

Using a MLM approach the outcomes are modelled jointly, which allows for non-zero covariances

1  
2  
3 between the intercepts and slopes of the two responses ( $\sigma_{u02}, \sigma_{u12}, \sigma_{u03}, \sigma_{u13}$ ). The measurement  
4  
5 errors for the two responses are not assumed to be independent, with their covariance directly  
6  
7 estimated ( $\sigma_{\varepsilon12}$ ).  
8  
9

10 Finally, the threshold of response must be decided and individual trajectories estimated and  
11  
12 classified. Similar to the other methods it is relatively simple to construct a test statistic for testing  
13  
14 whether individual slopes are significantly different from the chosen threshold.  
15  
16

17 *Limitations of the MLM approach.* The MLM approach described by Equation 1, Equation 2 and 3  
18  
19 assumes that change in the outcome is linearly associated with time. The linearity assumption is  
20  
21 imposed for simplicity. Non-linear changes are easily incorporated by including higher order  
22  
23 polynomials or using linear or non-linear splines.<sup>56</sup>  
24  
25

26  
27 The standard MLM approach also fails to directly address the issue of floor and ceiling effects.  
28  
29 Mixed response multi-level tobit models allow for such effects and provide some adjustment.<sup>45 57</sup>  
30  
31 Furthermore, whilst the MLM described in Equation 2 allow for heterogeneity in known groups, they  
32  
33 fail to allow for heterogeneity in trajectories when the groups are unknown. The use of group based  
34  
35 trajectory models or growth mixture models in these circumstances may reveal latent (unobserved)  
36  
37 classes of individuals with distinct patterns of recovery.<sup>58</sup>  
38  
39  
40  
41  
42  
43  
44  
45  
46  
47  
48  
49  
50  
51  
52  
53  
54  
55  
56  
57  
58  
59  
60

1  
2  
3 Example: The APEX cohort Study  
4

5  
6 Using a mixed cohort of patients undergoing THR and TKR,<sup>41</sup> we investigated the performance of the  
7  
8 existing and MLM approaches using four definitions of responsiveness. A simulated dataset and code  
9  
10 to fit each of these models is included in supplementary material.  
11

12  
13 Patients in the APEX cohort completed the Intermittent and Constant Osteoarthritis Pain (ICOAP)  
14  
15 questionnaire before and after surgery at approximately 0, 3, 6 and 12 months. The date at which  
16  
17 the post-surgical questionnaire was completed is recorded in days post-surgery. As the name  
18  
19 suggests, the ICOAP questionnaire attempts to measure intermittent and constant pain.<sup>21</sup> The  
20  
21 developers of the tool suggest three ways of summarising the scale to generate an intermittent,  
22  
23 constant and total pain scores (the sum of the intermittent and constant pain subscales). The tool is  
24  
25 scored between 0 and 100 and a full description of the ICOAP scale is provided in the original  
26  
27 validation paper.<sup>21</sup> Satisfaction of pain relief following surgery was recorded by asking patients to  
28  
29 “Rate of Relief provided by (hip/knee) replacement?” using a single item 5 point scale (None, Poor,  
30  
31 Fair, Good, Excellent), we categorised good and excellent as a satisfactory outcome following  
32  
33 surgery.  
34  
35

36  
37  
38 Using the three methods of aggregation, we present estimates of pain at baseline and for change at  
39  
40 approximately 3 months post-surgery using existing methods (summary statistics) and MLM  
41  
42 estimates.  
43

44  
45 In order to facilitate comparisons between existing and MLM approaches we assume that all  
46  
47 individuals are measured at exactly 0, 3, 6, and 12 months. Whilst the existing approaches only  
48  
49 utilises the 0 and 3 month measurements the MLM approach uses a random intercept and random  
50  
51 slopes across 4 measurements occasions, using two linear splines with a knot point at 3 months to  
52  
53 estimate the response at 3 months. The inclusion of the second spline and the additional two  
54  
55 measurement occasions allows adjustment for measurement error in the MLM approach. Table 1  
56  
57  
58  
59  
60

1  
2  
3 and 2 presents results for patients undergoing THR and TKR respectively. The placement of the knot  
4  
5 at 3 months was determined by visually inspecting the data, similar to the methods by Lenguerrand  
6  
7 et al.<sup>59</sup> With more complex patterns of response an iterative model fitting approach is likely to be  
8  
9 required to determine the optimal knot placement. Modelling assumptions were checked using  
10  
11 ladder plots, and normal plots of residuals.  
12

13  
14 To describe how the responsiveness classification in patients changed at 3 months, we used an Exact  
15  
16 McNemar test to compare the number of discordant classifications generated by existing and MLM  
17  
18 approaches.  
19

20  
21 The APEX study were approved by Southampton and South West Hampshire Research Ethics  
22  
23 Committee (09/H0504/94).  
24  
25  
26  
27  
28  
29  
30  
31  
32  
33  
34  
35  
36  
37  
38  
39  
40  
41  
42  
43  
44  
45  
46  
47  
48  
49  
50  
51  
52  
53  
54  
55  
56  
57  
58  
59  
60

## RESULTS

In all subdivisions of the ICOAP questionnaire, for THR/TKR patients, the estimates of the baseline mean and change scores are approximately equal to those from the MLM approaches. In addition, estimates of the SD of baseline and change score are overestimated using existing approaches in THR/TKR patients. The SD of baseline measurements is approximately 3.3 and 3.75 points greater in existing methods in THR/TKR patients respectively, while the corresponding SD of change scores are approximately 6.3 and 7 points greater in existing methods, see table 1 and 2 respectively. An example of model diagnostics is included in Figure 2, which presents the observed ICOAP total scores at 0, 3, 6, and 12 months and the population average response in ICOAP across time. In addition, baseline, change residuals are also presented using quantile quantile plots.

1  
2  
3  
4  
5  
6  
7  
8  
9  
10  
11  
12  
13  
14  
15  
16  
17  
18  
19  
20  
21  
22  
23  
24  
25  
26  
27  
28  
29  
30  
31  
32  
33  
34  
35  
36  
37  
38  
39  
40  
41  
42  
43  
44  
45  
46  
47  
48  
49

Table 1: Mean and standard deviation of baseline and change scores estimated using current and multi-level model approaches to responsiveness in patient undergoing total hip replacement in the APEX cohort study. Betas represent the population average characteristic and sigma the estimated standard deviation. Baseline is assumed to be the day of surgery, and change is from 0 to 3.6 months.

|                    | N   | Current Approaches to Responsiveness |                                   |                       |                   | Multi-Level Model Approaches to Responsiveness |                                   |                       |                   |
|--------------------|-----|--------------------------------------|-----------------------------------|-----------------------|-------------------|------------------------------------------------|-----------------------------------|-----------------------|-------------------|
|                    |     | Baseline<br>$\beta_0$ $\sigma_{u0}$  | Change<br>$\beta_1$ $\sigma_{u1}$ | Absolute<br>Threshold | P(Resp.)          | Baseline<br>$\beta_0$ $\sigma_{u0}$            | Change<br>$\beta_1$ $\sigma_{u1}$ | Absolute<br>Threshold | P(Resp.)          |
| Return to Normal   | 210 | 43.71 (22.1)                         | 45.76 (24.0)                      | 87.9                  | 70.5 (63.8, 76.6) | 43.71 (20.1)                                   | 46.14 (19.7)                      | 83.8                  | 78.1 (71.9, 83.5) |
| MID                | 210 |                                      |                                   | 11.0                  | 91.9 (87.4, 95.2) |                                                |                                   | 10.0                  | 97.6 (94.5, 99.2) |
| MCID (Satisfied)   | 185 | 44.37 (22.0)                         | 48.43 (22.6)                      | 32.6                  | 71.9 (65.3, 77.9) | 44.37 (20.3)                                   | 48.54 (19.2)                      | 35.8                  | 67.1 (74.5, 85.6) |
| MCID (UnSatisfied) | 25  | 38.77 (22.4)                         | 26.05 (25.4)                      |                       |                   | 38.77 (17.0)                                   | 28.43 (16.3)                      |                       |                   |
| Return to Normal   | 210 | 49.19 (27.2)                         | 44.23 (27.3)                      | 103.5                 | 0 (0, 1.7)        | 49.19 (25.6)                                   | 44.35 (24.0)                      | 100.3                 | 0 (0, 1.7)        |
| MID                | 210 |                                      |                                   | 13.6                  | 84.3 (78.6, 88.9) |                                                |                                   | 12.8                  | 88.6 (83.5, 92.5) |
| MCID (Satisfied)   | 185 | 50.08 (27.4)                         | 46.37 (26.7)                      | 30.0                  | 72.4 (65.8, 78.3) | 50.08 (26.3)                                   | 46.21 (24.5)                      | 31.0                  | 73.3 (44.2, 58.9) |
| MCID (UnSatisfied) | 25  | 42.60 (24.8)                         | 28.40 (26.9)                      |                       |                   | 42.60 (18.3)                                   | 30.60 (12.6)                      |                       |                   |
| OO                 | 210 | 49.19 (27.2)                         | 44.23 (27.3)                      | 20(10)                | 92.4 (87.9, 95.6) | 49.19 (25.3)                                   | 44.35 (23.4)                      | 20(10)                | 99.5 (54.8, 69)   |
| Return to Normal   | 210 | 39.13 (21.7)                         | 47.06 (26.5)                      | 82.5                  | 70 (63.3, 76.1)   | 39.13 (18.7)                                   | 47.66 (20.5)                      | 76.5                  | 80.5 (90.5, 97.4) |
| MID                | 210 |                                      |                                   | 10.8                  | 90 (85.1, 93.7)   |                                                |                                   | 9.3                   | 97.1 (30, 44.1)   |
| MCID (Satisfied)   | 185 | 39.60 (21.7)                         | 50.17 (24.9)                      | 37.5                  | 71.4 (64.8, 77.4) | 39.60 (19.2)                                   | 50.50 (19.1)                      | 40.5                  | 67.1 (84.8, 93.9) |
| MCID (UnSatisfied) | 25  | 35.58 (21.4)                         | 24.08 (26.6)                      |                       |                   | 35.58 (13.9)                                   | 26.69 (17.1)                      |                       |                   |
| OO                 | 210 | 39.13 (21.7)                         | 47.06 (26.5)                      | 20(10)                | 92.4 (87.9, 95.6) | 39.13 (18.5)                                   | 47.66 (19.1)                      | 20(10)                | 99.5 (60.3, 73.5) |

MID = Minimally Important Difference, MCID = Minimally Clinically Important Difference, OO= OMERACT OARSI responder criteria. P(Resp.) = Proportion of Responders.

Table 2: Mean and standard deviation of baseline and change scores estimated using current and multi-level model approaches to responsiveness in patient undergoing total knee replacement in the APEX cohort study. Betas represent the population average characteristic and sigma the estimated standard deviation. Baseline is assumed to be the day of surgery, and change is from 0 to 3.6 months.

|                   | N                  | Current Approaches to Responsiveness |                                   |                       |          | Multi-Level Model Approaches to Responsiveness |                                   |                       |          |                   |
|-------------------|--------------------|--------------------------------------|-----------------------------------|-----------------------|----------|------------------------------------------------|-----------------------------------|-----------------------|----------|-------------------|
|                   |                    | Baseline<br>$\beta_0$ $\sigma_{u0}$  | Change<br>$\beta_1$ $\sigma_{u1}$ | Absolute<br>Threshold | P(Resp.) | Baseline<br>$\beta_0$ $\sigma_{u0}$            | Change<br>$\beta_1$ $\sigma_{u1}$ | Absolute<br>Threshold | P(Resp.) |                   |
| Total Pain        | Return to Normal   | 190                                  | 42.86 (19.7)                      | 31.27 (23.2)          | 82.3     | 43.2 (36, 50.5)                                | 42.89 (16.7)                      | 32.09 (17.7)          | 76.3     | 51.6 (60.3, 73.5) |
|                   | MID                | 190                                  |                                   |                       | 9.9      | 79.5 (73, 85)                                  |                                   |                       | 8.3      | 93.2 (60.3, 73.5) |
|                   | MCID (Satisfied)   | 138                                  | 44.09 (19.7)                      | 38.51 (20.6)          | 22.7     | 62.6 (55.3, 69.5)                              | 44.13 (16.7)                      | 38.76 (14.7)          | 29.9     | 55.3 (66.8, 79.2) |
|                   | MCID (UnSatisfied) | 52                                   | 39.62 (19.7)                      | 12.04 (18.0)          |          |                                                | 39.62 (16.3)                      | 14.28 (11.5)          |          |                   |
| Chronic Pain      | Return to Normal   | 190                                  | 47.76 (23.6)                      | 31.61 (25.5)          | 94.9     | 44.7 (37.5, 52.1)                              | 47.79 (20.5)                      | 32.46 (19.5)          | 88.7     | 36.8 (47.9, 62.5) |
|                   | MID                | 190                                  |                                   |                       | 11.8     | 74.7 (67.9, 80.7)                              |                                   |                       | 10.2     | 90 (47.9, 62.5)   |
|                   | MCID (Satisfied)   | 138                                  | 48.80 (23.4)                      | 38.59 (23.3)          | 23.7     | 64.2 (57, 71)                                  | 48.88 (20.5)                      | 38.88 (17.7)          | 30.3     | 55.3 (47.4, 62)   |
|                   | MCID (UnSatisfied) | 52                                   | 45.00 (24.1)                      | 13.08 (21.9)          |          |                                                | 45.00 (20.1)                      | 15.26 (13.3)          |          |                   |
|                   | OO                 | 190                                  | 47.76 (23.6)                      | 31.61 (25.5)          | 20(10)   | 81.0 (74.7, 86.3)                              | 47.78 (20.2)                      | 32.50 (18.9)          | 20(10)   | 98.4 (47.9, 62.5) |
| Intermittent Pain | Return to Normal   | 190                                  | 38.78 (18.2)                      | 30.97 (23.9)          | 75.3     | 40.5 (33.5, 47.9)                              | 38.80 (13.8)                      | 31.77 (16.7)          | 66.4     | 62.1 (47.9, 62.5) |
|                   | MID                | 190                                  |                                   |                       | 9.1      | 78.9 (72.5, 84.5)                              |                                   |                       | 6.9      | 94.7 (97.4, 100)  |
|                   | MCID (Satisfied)   | 138                                  | 40.15 (18.3)                      | 38.45 (21.2)          | 24.8     | 61.6 (54.3, 68.5)                              | 40.20 (14.1)                      | 38.63 (12.8)          | 31.2     | 54.7 (97.4, 100)  |
|                   | MCID (UnSatisfied) | 52                                   | 35.14 (17.8)                      | 11.12 (19.0)          |          |                                                | 35.14 (12.8)                      | 13.40 (10.8)          |          |                   |
|                   | OO                 | 190                                  | 38.78 (18.2)                      | 30.97 (23.9)          | 20(10)   | 81.0 (74.7, 86.3)                              | 38.81 (13.6)                      | 31.74 (15.7)          | 20(10)   | 98.4 (95.5, 99.7) |

MID = Minimally Important Difference, MCID = Minimally Clinically Important Difference, OO= OMERACT OARSI responder criteria. P(Resp.) = Proportion of Responders.



### Return To Normal

Using similar baseline score estimates to the conventional RTN approach and different SD's results in a reduction in the threshold of response by approximately 5 points in THR/TKR patients. The change in threshold is due to smaller estimates of baseline and change SD's. When considering the total ICOAP score, the MLM approach classifies approximately 10% more individuals as responders than existing approaches. It is also interesting to note that the threshold of response using the existing approach when considering total ICOAP score in THR patients is beyond the range of the score.

### Minimally Important Difference

Using similar change score estimates and different SD's results in an approximately 2 point reduction in the MID threshold in THR/TKR patients. The reduced threshold results in more individuals being classified as responders using the MLM approach.

### Minimally Clinically Important Difference

Using the MLM approach in satisfied and unsatisfied individuals results in a small increase in the threshold of response in comparison to existing approaches. The increase in threshold is due to shrunken residuals and therefore reduced variability of predicted change scores. The increase in threshold results in a reduced number of individuals (3% of THR patients and 6% of TKR patients) being identified as responders.

### OMERACT-OARSI

The OO approach uses fixed definitions of responsiveness. Individual estimates of change from the bivariate MLM for constant and intermittent pain are very similar to those from the univariate MLM. However the standard deviation of the change score is reduced by approximately 0.5 and 1 points in constant and intermittent pain comparing the univariate and bivariate MLM respectively, whereas

1  
2  
3 the SD of baseline score approximately the same. Despite the larger absolute threshold of 20 and 10  
4  
5 points for changes in 1 or 2 items respectively, i.e. larger than MID, there is an increase in the  
6  
7 proportion of individuals identified as responding. The increase is partly due to the use of the  
8  
9 relative change threshold, and the reduced variability in change in comparison to the univariate  
10  
11 MLM using MID definition of responsiveness.  
12

### 13 14 Responsiveness Classification

15  
16  
17 The effect of using a MLM approach to define patient responsiveness compared to existing  
18  
19 approaches is presented in Tables 3 and 4 for THR and TKR patients respectively. Whilst the use of  
20  
21 MLM provides refined thresholds of responsiveness it fundamentally changes the way individuals  
22  
23 are classified due to adjustment for measurement error, regression to the mean and ability to  
24  
25 conduct refined test. Patients previously defined as non-responding using existing methods are now  
26  
27 responders (Positive change) in MLM approaches, and similarly patients defined as responders using  
28  
29 existing methods are classified as non-responders (negative change) in MLM, see Figure 3 for  
30  
31 graphical illustration. MLM MID and OO methods appear to be most consistent in the reclassification  
32  
33 of patients increasing the number of patients defined as non-responders using existing methods as  
34  
35 responders in MLM approaches. Whereas MLM RTN and MCII provide a more fundamental change  
36  
37 the classifications of patient responsiveness.  
38  
39  
40  
41  
42  
43  
44  
45  
46  
47  
48  
49  
50  
51  
52  
53  
54  
55  
56  
57  
58  
59  
60

Table 3: Cross classification of responsiveness status in THR patients using existing and MLM model approaches to responsiveness: Return To Normal (RTN), Minimally Important Difference (MID), Minimally Clinical Important Improvement (MCII), and OMERACT OARSI (OO) Criteria.

| Total Hip Replacement<br>ICOAP        |        | Multilevel Model |            |           |            |           |            |          |            |
|---------------------------------------|--------|------------------|------------|-----------|------------|-----------|------------|----------|------------|
|                                       |        | RTN              |            | MID       |            | MCII      |            | OO       |            |
|                                       |        | N.Resp           | Resp       | N.Resp    | Resp       | N.Resp    | Resp       | N.Resp   | Resp       |
| Total                                 | N.Resp | <b>36</b>        | <b>26</b>  | <b>5</b>  | <b>12</b>  | <b>52</b> | <b>7</b>   | -        | -          |
|                                       | Resp   | <b>10</b>        | <b>138</b> | <b>0</b>  | <b>193</b> | <b>17</b> | <b>134</b> | -        | -          |
| Existing<br>Chronic                   | N.Resp | 210              | 0          | <b>24</b> | <b>9</b>   | 52        | 6          | -        | -          |
|                                       | Resp   | 0                | 0          | <b>0</b>  | <b>177</b> | 4         | 148        | -        | -          |
| Existing<br>Intermittent              | N.Resp | <b>33</b>        | <b>30</b>  | <b>6</b>  | <b>15</b>  | 50        | 10         | -        | -          |
|                                       | Resp   | <b>8</b>         | <b>139</b> | <b>0</b>  | <b>189</b> | 19        | 131        | -        | -          |
| Existing<br>Chronic &<br>Intermittent | N.Resp | -                | -          | -         | -          | -         | -          | <b>1</b> | <b>15</b>  |
|                                       | Resp   | -                | -          | -         | -          | -         | -          | <b>0</b> | <b>194</b> |

N.Resp= Non-Responders; Resp = Responders; Bold Cells indicate significance ( $p \leq 0.05$ ) of discordant pairs using Exact McNemar test.

Table 4: Cross classification of responsiveness status in TKR patients using existing and MLM model approaches to responsiveness: Return To Normal (RTN), Minimally Important Difference (MID), Minimally Clinical Important Improvement (MCII), and OMERACT OARSI (OO) Criteria.

| Total Knee Replacement<br>ICOAP       |        | Multilevel Model |           |           |            |           |           |          |            |
|---------------------------------------|--------|------------------|-----------|-----------|------------|-----------|-----------|----------|------------|
|                                       |        | RTN              |           | MID       |            | MCII      |           | OO       |            |
|                                       |        | N.Resp           | Resp      | N.Resp    | Resp       | N.Resp    | Resp      | N.Resp   | Resp       |
| Total                                 | N.Resp | <b>81</b>        | <b>27</b> | <b>13</b> | <b>26</b>  | <b>64</b> | <b>7</b>  | -        | -          |
|                                       | Resp   | <b>11</b>        | <b>71</b> | <b>0</b>  | <b>151</b> | <b>21</b> | <b>98</b> | -        | -          |
| Existing<br>Chronic                   | N.Resp | 92               | 13        | <b>19</b> | <b>29</b>  | 61        | 7         | -        | -          |
|                                       | Resp   | 28               | 57        | <b>0</b>  | <b>142</b> | 24        | 98        | -        | -          |
| Existing<br>Intermittent              | N.Resp | <b>69</b>        | <b>44</b> | <b>9</b>  | <b>31</b>  | 63        | 10        | -        | -          |
|                                       | Resp   | <b>3</b>         | <b>74</b> | <b>1</b>  | <b>149</b> | 23        | 94        | -        | -          |
| Existing<br>Chronic &<br>Intermittent | N.Resp | -                | -         | -         | -          | -         | -         | <b>3</b> | <b>33</b>  |
|                                       | Resp   | -                | -         | -         | -          | -         | -         | <b>0</b> | <b>154</b> |

N.Resp= Non-Responders; Resp = Responders; Bold Cells indicate significance ( $p \leq 0.05$ ) of discordant pairs using Exact McNemar test.

## DISCUSSION

The primary purpose of a responsiveness analysis is to convey the variability of an individual's chances of perceiving an improvement following a treatment. Existing approaches appear to be distinct from one another, and the precise relationship between existing methods were unclear.

We have clearly shown how four commonly used approaches to estimating patient responsiveness can be incorporated into the unified statistical framework of MLM. Their translation into a unified framework makes many of the assumptions (linearity of response, heterogeneity in timing of measures, multiple measurements) underpinning existing approaches clear. The application of patient responsiveness models in a cohort of orthopaedic patients illustrates how SD's of baseline and change scores in existing approaches are overestimated in comparison to the MLM approach. Thresholds for defining responders from MLM are lower when based on SD, and therefore existing approaches to RTN & MID may appear to provide a worse case scenario with regards the efficacy of a treatment or therapy. Similarly, responsiveness approaches based on the distribution of predicted change scores (MCII) are higher in MLM, and therefore existing thresholds could be described as a best case scenario in comparison to existing approaches. However, the reclassification of patients using the MLM is more fundamental than increasing or reducing the threshold to determine responsiveness, the implicit adjustments for measurement error and regression to the mean change which patients are defined as responding or not.

MLM are not the panacea of patient responsiveness methods, however they do highlight implicit assumptions in existing approaches and provide sensible adjustments for measurement error, regression to the mean and heterogeneity in the timing of measurements in clinical studies.

From a clinical perspective, it is very clear there are differences in the outcomes at 3 months following THR and TKR. Whilst patient's baseline level of pain, are similar between THR and TKR, the response to surgery is less, and consistently less (lower variability) for all pain domains. Similarly, we

1  
2  
3 have previously observed different patterns of pain, in relation to pain at rest and pain on  
4  
5 movement,<sup>60</sup> yet the mechanisms underpinning these effects are unclear and require more  
6  
7 research, but this does emphasize the necessity to treat hip and knee osteoarthritis as separate  
8  
9 disease states.

#### 10 11 12 Strengths & Limitations

13  
14  
15 One of the key benefits of adopting a MLM approach when defining clinically meaningful change is  
16  
17 the improved estimation of individual change by the greater flexibility in the MLM framework.  
18  
19 Specifically, MLM do not assume the response is measured without error, they adjust for regression  
20  
21 to the mean, the trajectory of recovery is not constrained to be linear, and data from multiple  
22  
23 measurements and variability in the timing of those measurement occasions can also be  
24  
25 incorporated into the model. Furthermore, assuming the underlying MLM adequately represents the  
26  
27 true causal mechanism, parameter estimates, SD's and standard errors will be unbiased in  
28  
29 comparison to existing approaches.  
30  
31

32  
33  
34 Furthermore, the unification of existing approaches into a MLM framework clearly shows the  
35  
36 relationship between the four different approaches. For example, RTN and MID share the same  
37  
38 underlying model. MCII is also the same at RTN/MID if you assume the baseline and change scores  
39  
40 are the same across strata of un/satisfied patients. Similarly, the model underlying OO approach is  
41  
42 the same as the RTN/MID approach if you assume independence in the measured outcomes of the  
43  
44 two trajectories, and error term.  
45

46  
47  
48 Despite the numerous benefits of adopting a MLM approach, it is not to say it is without some  
49  
50 limitations. MLM are technically more demanding than existing formulations of patient  
51  
52 responsiveness, and whilst there are no theoretical limits on how large or small samples have to be,  
53  
54 model convergence is not guaranteed, and the need to use appropriate estimation methods<sup>38</sup> or  
55  
56 denominator degrees of freedom<sup>55</sup> when calculating standard errors requires consideration.  
57  
58  
59  
60

1  
2  
3 Furthermore, it is important to perform model diagnostic to check the data fit with the model. MLM  
4  
5 does not improve the arbitrary placement of the thresholds that define responsiveness in  
6  
7 comparison to existing methods, and despite the improved trajectory modelling it is currently  
8  
9 unclear if the refined definitions correlate more strongly with patient expectations, functional data,  
10  
11 long term self-reported outcomes, or hard end-points such as mortality and revision. Further  
12  
13 research externally validating the classification using patient groups, expert opinion<sup>61</sup> or functional  
14  
15 data may demonstrate improved classification of those responding to treatment in comparison to  
16  
17 existing methods.  
18  
19

20  
21 It is clear the MLMs provide considerable advantages over existing approaches to identifying  
22  
23 patients who respond to a treatment. Consequently, the proportion of individuals thought not to be  
24  
25 responding to treatment may be smaller than previously thought. Using the redefined definition may  
26  
27 reduce the number of individuals misclassified as non-responders, and improve the prediction of  
28  
29 those individuals who are likely to respond to treatment.  
30  
31  
32  
33  
34  
35  
36  
37  
38  
39  
40  
41  
42  
43  
44  
45  
46  
47  
48  
49  
50  
51  
52  
53  
54  
55  
56  
57  
58  
59  
60

## Figures

Figure 1: Illustration of a “double” long data setup for creating a bivariate MLM.

Figure 2: Modelling diagnostic plots. Upper left, ladder plot of observed ICOAP total scores at 0, 3, 6, and 12 months following THR, and population average trajectory estimated from a MLM, used in RTN and MID analysis, with 2 linear splines with a knot at 3 months. Upper right, lower left and right plots are quantile-quantile plots of the residual distribution of random effects estimated from a MLM with 2 linear splines with a knot at 3 months.

Figure 3: Change in Responder classification using a RTN definition comparing existing approaches to MLM approach using the ICOAP total score in patients following THR. Upper Left panel illustrates observed trajectories for patients whose responsiveness classification changes using a MLM approach to estimating responsiveness. Lower left panel illustrates the observed and predicted trajectories of ICOAP total score in patients positively reclassified as responders compared to existing approaches. Lower right panel illustrates the observed and predicted trajectories of ICOAP total score in patients negatively reclassified as non-responders compared to existing approaches.

## Abbreviations

APEX – Arthroplasty Pain Experience

ICOAP - Intermittent and Constant Osteoarthritis Pain

MCII – Minimally Clinical Important Improvement

MID – Minimal Important Difference

MLM – Multi Level Model

OO – OMERACT OARSI Criteria

RCI – Relative Change Index

RTN – Return To Normal

SD – Standard Deviation

SE – Standard Error

THR – Total Hip Replacement

1  
2  
3 TKR – Total Knee Replacement  
4

5  
6 **Acknowledgements**  
7

8 We would like to thank Professor Fiona Steele for her extensive comments and help preparing  
9  
10 this manuscript.  
11

12  
13 **Author Contributions**  
14

15  
16 Study Conception (AS). APEX study design (VW, RGH, AWB). APEX acquisition of data (VW, RGH,  
17 AWB, EL). ACHE study design (JD, DB, AP). Wrote first draft & revised manuscript (AS). Drafting and  
18 review of manuscript (AS, VW, RGH, AWB, EL, JD, DB, AP). Final approval of Manuscript (AS, VW,  
19 RGH, AWB, EL, JD, DB, AP)  
20  
21

22  
23 **Funding Statement**  
24

25  
26 This work was supported by AS is funded by an MRC Fellowship MR/L01226X/1 and HTA  
27 Project:11/63/01 – ‘ACHE’. This article presents independent research funded by the National  
28 Institute for Health Research (NIHR) under its Programme Grants for Applied Research programme  
29 (RP-PG-0407-10070). The views expressed in this article are those of the authors and not necessarily  
30 those of the NHS, the NIHR or the Department of Health. The research team acknowledge the  
31 support of the NIHR, through the Comprehensive Clinical Research Network.  
32  
33

34  
35 **Competing Interest**  
36

37  
38 The Authors have no competing interests to declare.  
39

40  
41 **Data Sharing**  
42

43  
44 No data is available to be shared.  
45  
46  
47  
48  
49  
50  
51  
52  
53  
54  
55  
56  
57  
58  
59  
60



## REFERENCES

1. Felson DT, Naimark A, Anderson J, et al. The prevalence of knee osteoarthritis in the elderly. The Framingham Osteoarthritis Study. *Arthritis and rheumatism* 1987;30(8):914-8. [published Online First: 1987/08/01]
2. Lawrence RC, Felson DT, Helmick CG, et al. Estimates of the prevalence of arthritis and other rheumatic conditions in the United States. Part II. *Arthritis and rheumatism* 2008;58(1):26-35. doi: 10.1002/art.23176
3. National Joint Registry. 10th Annual Report 2013. Hemel Hempstead 2013.
4. Beswick AD, Wylde V, Gooberman-Hill R, et al. What proportion of patients report long-term pain after total hip or knee replacement for osteoarthritis? A systematic review of prospective studies in unselected patients. *Bmj Open* 2012;2(1) doi: ARTN e000435  
DOI 10.1136/bmjopen-2011-000435
5. Jeffery AE, Wylde V, Blom AW, et al. "It's there and I'm stuck with it": patients' experiences of chronic pain following total knee replacement surgery. *Arthritis care & research* 2011;63(2):286-92. doi: 10.1002/acr.20360
6. Kassam A, Dieppe P, Toms AD. An analysis of time and money spent on investigating painful Total Knee Replacements. *British Journal of Medical Practitioners* 2012;5(3)
7. Bellamy N, Buchanan WW, Goldsmith CH, et al. Validation study of WOMAC: a health status instrument for measuring clinically important patient relevant outcomes to antirheumatic drug therapy in patients with osteoarthritis of the hip or knee. *The Journal of rheumatology* 1988;15(12):1833-40.
8. Klassbo M, Larsson E, Mannevik E. Hip disability and osteoarthritis outcome score. An extension of the Western Ontario and McMaster Universities Osteoarthritis Index. *Scandinavian journal of rheumatology* 2003;32(1):46-51.
9. Roos EM, Roos HP, Lohmander LS, et al. Knee Injury and Osteoarthritis Outcome Score (KOOS)--development of a self-administered outcome measure. *The Journal of orthopaedic and sports physical therapy* 1998;28(2):88-96. doi: 10.2519/jospt.1998.28.2.88
10. Dawson J, Fitzpatrick R, Carr A, et al. Questionnaire on the perceptions of patients about total hip replacement. *J Bone Joint Surg Br* 1996;78B(2):185-90.
11. Dawson J, Fitzpatrick R, Murray D, et al. Questionnaire on the perceptions of patients about total knee replacement. *J Bone Joint Surg Br* 1998;80B(1):63-69. doi: Doi 10.1302/0301-620x.80b1.7859
12. Focht BC, Rejeski WJ, Ambrosius WT, et al. Exercise, self-efficacy, and mobility performance in overweight and obese older adults with knee osteoarthritis. *Arthritis and rheumatism* 2005;53(5):659-65. doi: 10.1002/art.21466
13. Smith AJ, Dieppe P, Howard PW, et al. Failure rates of metal-on-metal hip resurfacings: analysis of data from the National Joint Registry for England and Wales. *Lancet* 2012;380(9855):1759-66. doi: 10.1016/s0140-6736(12)60989-1
14. Smith AJ, Dieppe P, Porter M, et al. Risk of cancer in first seven years after metal-on-metal hip replacement compared with other bearings and general population: linkage study between the National Joint Registry of England and Wales and hospital episode statistics. *Bmj* 2012;344:e2383. doi: 10.1136/bmj.e2383
15. Hunt LP, Ben-Shlomo Y, Clark EM, et al. 45-day mortality after 467 779 knee replacements for osteoarthritis from the National Joint Registry for England and Wales: an observational study. *Lancet* 2014 doi: 10.1016/s0140-6736(14)60540-7

16. Hunt LP, Ben-Shlomo Y, Clark EM, et al. 90-day mortality after 409,096 total hip replacements for osteoarthritis, from the National Joint Registry for England and Wales: a retrospective analysis. *Lancet* 2013;382(9898):1097-104. doi: 10.1016/s0140-6736(13)61749-3
17. Riddle DL, Stratford PW, Bowman DH. Findings of extensive variation in the types of outcome measures used in hip and knee replacement clinical trials: A systematic review. *Arthritis Rheum-Arthr* 2008;59(6):876-83. doi: Doi 10.1002/Art.23706
18. Wylde V, Bruce J, Beswick A, et al. Assessment of chronic postsurgical pain after knee replacement: a systematic review. *Arthritis care & research* 2013;65(11):1795-803. doi: 10.1002/acr.22050
19. Wylde V, Blom AW. The failure of survivorship. *The Journal of bone and joint surgery British volume* 2011;93(5):569-70. doi: 10.1302/0301-620X.93B5.26687 [published Online First: 2011/04/23]
20. Darzi. High quality care for all: NHS Next Stage Review final report, 2008.
21. Hawker GA, Davis AM, French MR, et al. Development and preliminary psychometric testing of a new OA pain measure--an OARSI/OMERACT initiative. *Osteoarthritis and cartilage / OARS, Osteoarthritis Research Society* 2008;16(4):409-14. doi: 10.1016/j.joca.2007.12.015
22. Zigmond AS, Snaith RP. The hospital anxiety and depression scale. *Acta Psychiatr Scand* 1983;67(6):361-70.
23. Williams A, Kind P. The present state of play about QALYs. In: Hopkins A, ed. Measure of the quality of life: the uses to which they may be put: RCP publications 1992.
24. Christensen L, Mendoza JL. A Method of Assessing Change in a Single Subject - an Alteration of the Rc Index. *Behav Ther* 1986;17(3):305-08. doi: Doi 10.1016/S0005-7894(86)80060-0
25. Guyatt GH, Osoba D, Wu AW, et al. Methods to explain the clinical significance of health status measures. *Mayo Clinic proceedings* 2002;77(4):371-83. doi: 10.1016/S0025-6196(11)61793-X
26. Jacobson NS, Roberts LJ, Berns SB, et al. Methods for defining and determining the clinical significance of treatment effects: description, application, and alternatives. *Journal of consulting and clinical psychology* 1999;67(3):300-7.
27. Jacobson NS, Truax P. Clinical significance: a statistical approach to defining meaningful change in psychotherapy research. *Journal of consulting and clinical psychology* 1991;59(1):12-9.
28. Kvien TK, Heiberg T, Hagen KB. Minimal clinically important improvement/difference (MCI/ MCID) and patient acceptable symptom state (PASS): what do these concepts mean? *Annals of the rheumatic diseases* 2007;66 Suppl 3:iii40-1. doi: 10.1136/ard.2007.079798
29. Maksymowych WP, Richardson R, Mallon C, et al. Evaluation and validation of the patient acceptable symptom state (PASS) in patients with ankylosing spondylitis. *Arthritis and rheumatism* 2007;57(1):133-9. doi: 10.1002/art.22469
30. Norman GR, Sloan JA, Wyrwich KW. Interpretation of changes in health-related quality of life: the remarkable universality of half a standard deviation. *Medical care* 2003;41(5):582-92. doi: 10.1097/01.MLR.0000062554.74615.4C
31. Norman GR, Sridhar FG, Guyatt GH, et al. Relation of distribution- and anchor-based approaches in interpretation of changes in health-related quality of life. *Medical care* 2001;39(10):1039-47.
32. Pham T, van der Heijde D, Altman RD, et al. OMERACT-OARSI initiative: Osteoarthritis Research Society International set of responder criteria for osteoarthritis clinical trials revisited. *Osteoarthritis and cartilage / OARS, Osteoarthritis Research Society* 2004;12(5):389-99. doi: 10.1016/j.joca.2004.02.001
33. Revicki D, Hays RD, Cella D, et al. Recommended methods for determining responsiveness and minimally important differences for patient-reported outcomes. *Journal of clinical epidemiology* 2008;61(2):102-9. doi: 10.1016/j.jclinepi.2007.03.012
34. Tubach F, Ravaud P, Baron G, et al. Evaluation of clinically relevant changes in patient reported outcomes in knee and hip osteoarthritis: the minimal clinically important improvement. *Annals of the rheumatic diseases* 2005;64(1):29-33. doi: 10.1136/ard.2004.022905

- 1
- 2
- 3 35. Tubach F, Ravaud P, Baron G, et al. Evaluation of clinically relevant states in patient reported
- 4 outcomes in knee and hip osteoarthritis: the patient acceptable symptom state. *Annals of*
- 5 *the rheumatic diseases* 2005;64(1):34-7. doi: 10.1136/ard.2004.023028
- 6
- 7 36. Judge A, Cooper C, Williams S, et al. Patient-reported outcomes one year after primary hip
- 8 replacement in a European Collaborative Cohort. *Arthritis care & research* 2010;62(4):480-8.
- 9 doi: 10.1002/acr.20038
- 10
- 11 37. Goldstein H. *Multilevel Statistical Models* 2002.
- 12
- 13 38. Browne WJ, Draper D. Implementation and performance issues in the Bayesian and likelihood
- 14 fitting of multilevel models. *Computation Stat* 2000;15(3):391-420. doi: DOI
- 15 10.1007/s001800000041
- 16
- 17 39. King MT. A point of minimal important difference (MID): a critique of terminology and methods.
- 18 *Expert Rev Pharmacoecon Outcomes Res* 2011;11(2):171-84. doi: 10.1586/erp.11.9
- 19
- 20 40. Schuck P, Zwingmann C. The 'smallest real difference' as a measure of sensitivity to change: a
- 21 critical analysis. *Int J Rehabil Res* 2003;26(2):85-91. doi:
- 22 10.1097/01.mrr.0000070759.63544.65
- 23
- 24 41. Wylde V, Gooberman-Hill R, Horwood J, et al. The effect of local anaesthetic wound infiltration
- 25 on chronic pain after lower limb joint replacement: a protocol for a double-blind randomised
- 26 controlled trial. *BMC musculoskeletal disorders* 2011;12:53. doi: 10.1186/1471-2474-12-53
- 27
- 28 42. Altman DG, Gore SM, Gardner MJ, et al. Statistical guidelines for contributors to medical
- 29 journals. *British medical journal* 1983;286(6376):1489-93.
- 30
- 31 43. Sterne JA, Davey Smith G. Sifting the evidence-what's wrong with significance tests? *Bmj*
- 32 2001;322(7280):226-31.
- 33
- 34 44. McConnell S, Kolopack P, Davis AM. The Western Ontario and McMaster Universities
- 35 Osteoarthritis Index (WOMAC): A review of its utility and measurement properties. *Arthrit*
- 36 *Rheum-Arthr* 2001;45(5):453-61. doi: Doi 10.1002/1529-0131(200110)45:5<453::Aid-
- 37 Art365>3.0.Co;2-W
- 38
- 39 45. Twisk J, Rijmen F. Longitudinal tobit regression: A new approach to analyze outcome variables
- 40 with floor or ceiling effects. *Journal of clinical epidemiology* 2009;62(9):953-58. doi: DOI
- 41 10.1016/j.jclinepi.2008.10.003
- 42
- 43 46. Ram N, Grimm KJ. Growth mixture modeling: A method for identifying differences in longitudinal
- 44 change among unobserved groups. *Int J Behav Dev* 2009;33(6):565-76. doi: Doi
- 45 10.1177/0165025409343765
- 46
- 47 47. Jones G, Lyons P. Approximate graphical methods for inverse regression. *Journal of Data Science*
- 48 20009;7:61-72.
- 49
- 50 48. Snijders TAB, Bosker RJ. *Multilevel Analysis: An Introduction to Basic and Advanced Multilevel*
- 51 *Modeling*, second edition. London: Sage Publishers 2012.
- 52
- 53 49. Fieuws S, Verbeke G. Pairwise fitting of mixed models for the joint modeling of multivariate
- 54 longitudinal profiles. *Biometrics* 2006;62(2):424-31. doi: 10.1111/j.1541-0420.2006.00507.x
- 55
- 56 50. Fieuws S, Verbeke G. Joint modelling of multivariate longitudinal profiles: pitfalls of the random-
- 57 effects approach. *Statistics in medicine* 2004;23(20):3093-104. doi: 10.1002/sim.1885
- 58
- 59 51. Verbeke G, Molenberghs G. *Linear mixed models for longitudinal data*. USA: Springer 2000.
- 60
- 52 52. Rasbash J, Steele F, Browne WJ, et al. *A user's guide to MLWIN*. UK 2009.
- 53
- 54 53. Copas JB. *Regression, Prediction and Shrinkage*. *J R Stat Soc B* 1983;45(3):311-54.
- 55
- 56 54. Fitzmaurice GM, Laird NM, Ware JH. *Applied Longitudinal Analysis*. USA: Wiley 2004.
- 57
- 58 55. Kenward MG, Roger JH. Small sample inference for fixed effects from restricted maximum
- 59 likelihood. *Biometrics* 1997;53(3):983-97.
- 60
- 56 56. Pan HQ, Goldstein H. Multi-level repeated measures growth modelling using extended spline
- 57 functions. *Statistics in medicine* 1998;17(23):2755-70. doi: Doi 10.1002/(Sici)1097-
- 58 0258(19981215)17:23<2755::Aid-Sim41>3.0.Co;2-E

- 1  
2  
3 57. Rabe-Hesketh S, Skrondal A. Multilevel and latent variable modeling with composite links and  
4 exploded likelihoods. *Psychometrika* 2007;72(2):123-40. doi: DOI 10.1007/s11336-006-1453-  
5 8  
6 58. Nagin DS, Odgers CL. Group-Based Trajectory Modeling in Clinical Research. *Annu Rev Clin Psycho*  
7 2010;6:109-38. doi: DOI 10.1146/annurev.clinpsy.121208.131413  
8 59. Lenguerrand E, Wylde V, Gooberman-Hill R, et al. Trajectories of Pain and Function after Primary  
9 Hip and Knee Arthroplasty: The ADAPT Cohort Study. *PLoS One* 2016;11(2):e0149306. doi:  
10 10.1371/journal.pone.0149306  
11 60. Sayers A, Wylde V, Lenguerrand E, et al. Rest Pain and Movement-Evoked Pain as Unique  
12 Constructs in Hip and Knee Replacements. *Arthritis care & research* 2016;68(2):237-45. doi:  
13 10.1002/acr.22656  
14 61. Bellamy N, Carette S, Ford PM, et al. Osteoarthritis antirheumatic drug trials. III. Setting the delta  
15 for clinical trials--results of a consensus development (Delphi) exercise. *The Journal of*  
16 *rheumatology* 1992;19(3):451-7.  
17  
18  
19  
20  
21  
22  
23  
24  
25  
26  
27  
28  
29  
30  
31  
32  
33  
34  
35  
36  
37  
38  
39  
40  
41  
42  
43  
44  
45  
46  
47  
48  
49  
50  
51  
52  
53  
54  
55  
56  
57  
58  
59  
60

1  
2  
3  
4  
5  
6  
7  
8  
9  
10  
11  
12  
13  
14  
15  
16  
17  
18  
19  
20  
21  
22  
23  
24  
25  
26  
27  
28  
29  
30  
31  
32  
33  
34  
35  
36  
37  
38  
39  
40  
41  
42  
43  
44  
45  
46  
47  
48  
49  
50  
51  
52  
53  
54  
55  
56  
57  
58  
59  
60

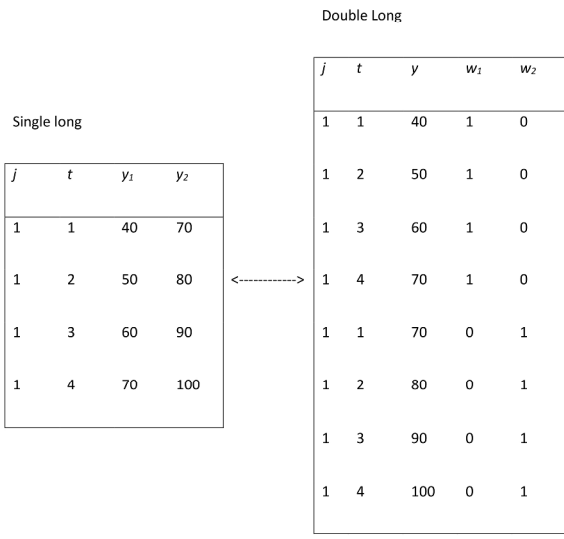

296x419mm (300 x 300 DPI)

1  
2  
3  
4  
5  
6  
7  
8  
9  
10  
11  
12  
13  
14  
15  
16  
17  
18  
19  
20  
21  
22  
23  
24  
25  
26  
27  
28  
29  
30  
31  
32  
33  
34  
35  
36  
37  
38  
39  
40  
41  
42  
43  
44  
45  
46  
47  
48  
49  
50  
51  
52  
53  
54  
55  
56  
57  
58  
59  
60

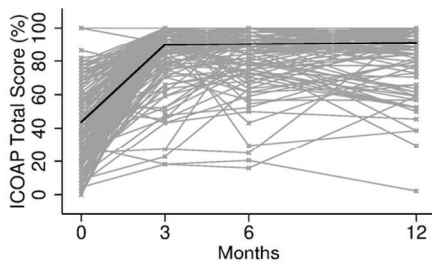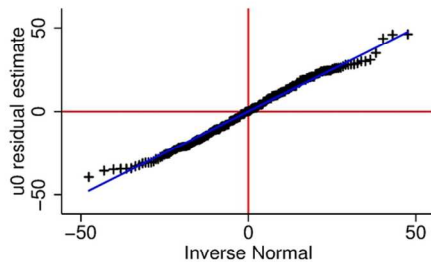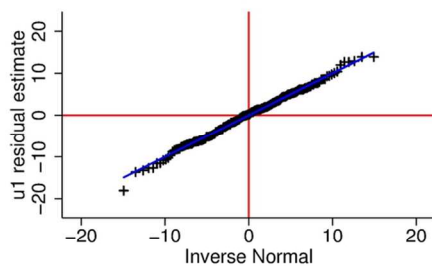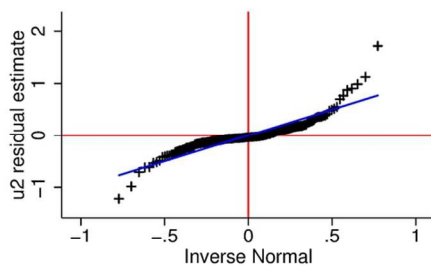

101x73mm (300 x 300 DPI)

Review only

1  
2  
3  
4  
5  
6  
7  
8  
9  
10  
11  
12  
13  
14  
15  
16  
17  
18  
19  
20  
21  
22  
23  
24  
25  
26  
27  
28  
29  
30  
31  
32  
33  
34  
35  
36  
37  
38  
39  
40  
41  
42  
43  
44  
45  
46  
47  
48  
49  
50  
51  
52  
53  
54  
55  
56  
57  
58  
59  
60

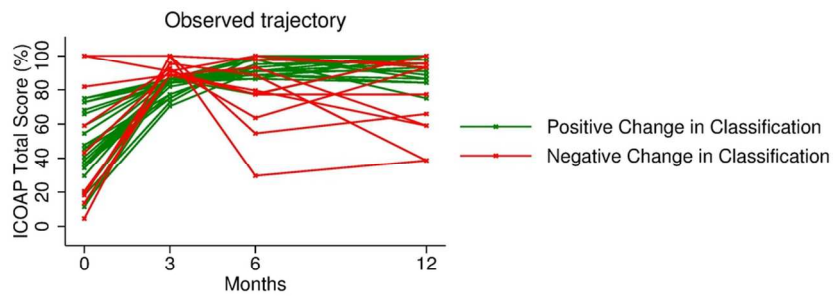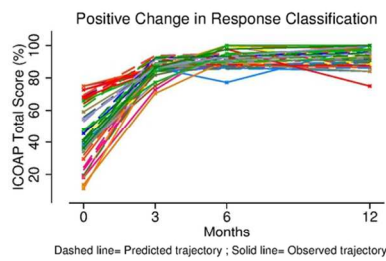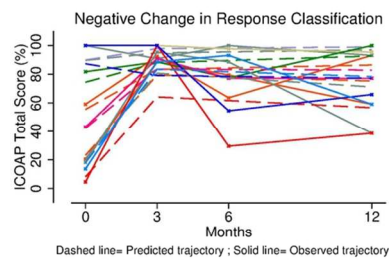

101x73mm (300 x 300 DPI)

Review only

```

*****
* A unified multi-level model approach to assessing patient responsiveness
* including; return to normal, minimally important differences, and minimally
* clinical important differences for patient reported outcome measures.
*****
*
* Sayers A*, Wylde V, Lenguerrand E, Gooberman-Hill R, Dawson J, Beard D,
* Price A, Blom AW
*
* 1. Musculoskeletal Research Unit, School of Clinical Sciences,
* University of Bristol, Southmead Hospital, Westbury On Trym,
* Bristol, BS10 5NB.
* 2. Nuffield Department of Population Health, University of Oxford,
* Old Road Campus, Headington, Oxford OX3 7LF, UK
* 3. Biomedical Research Unit, Nuffield Department of Orthopaedics,
* Rheumatology and Musculoskeletal Science, Nuffield Orthopaedic Centre,
* Windmill Road, Oxford, OX2 9JA
*
* Address for Correspondence
* Adrian Sayers, Musculoskeletal Research Unit, School of Clinical Sciences,
* University of Bristol, Learning and Research Building (Level 1),
* Southmead Hospital, Westbury on Trym, Bristol, BS10 5NB
*
*
* E-mail: adrian.sayers@bristol.ac.uk
* Tel: 44 (0)117 4147880; Fax + 44(0)117 414 7924
*****
* Abstract
* Stata code to illustrate calculation of patient responsiveness using existing
* and multi-level model methods.
* Do file should be run completely in order to simulate data from a linear model
* and perform calculations.
* File requires MLWin and copy of runmlwin downloaded for Stata.
*****
* 1. Simulate a dataset
*****
{
* Design matrix in OO Format
set seed 111
clear
set obs 100
gen id= _n

* Set Parameters values
* Set Fixed Effect Parameters
local b0 = 49.19
local b1 = 44.35 / 3
local b2 = 39.12

```



```

1
2
3           local b3 = 47.66 / 3
4 * Set Random Effect Standard Deviations & Correlation Matrix
5 local u0 = 25.3
6     local u1 = 23.4 / 3
7     local u2 = 18.5
8     local u3 = 19.1 / 3
9     matrix u = (`u0', `u1', `u2', `u3')'
10    matrix u_corr = (1 ,0.3 ,0.1 ,0.1 \ ///
11                    0.3 ,1 ,0.1 ,0.1 \ ///
12                    0.1 ,0.1 ,1 ,0.3 \ ///
13                    0.1 ,0.1 ,0.3 ,1 )
14
15 * Draw Random Parameters
16 drawnorm u0 u1 u2 u3 , sds(u) corr(u_corr)
17
18 * Create 4 measurement occasions
19 expand 4
20 by id , sort : gen t = _n-1
21
22 * Prepare for a reshape into double long
23 gen _1= 1
24 gen _2= 1
25 reshape long _ , i(id t) j(resp)
26 drop _
27
28 * Set error Standard Deviations & Correlation Matrix
29 local e1= 5
30 local e2= 5
31 matrix e = (`e1', `e2')'
32 matrix e_corr = (1 ,0.1 \ ///
33                  0.1 ,1 ) //
34
35 drawnorm e1 e2 , sds(e) corr(e_corr)
36
37 * Create response indicators for OO
38 gen w1 = 1 if resp==1
39 replace w1 = 0 if resp==2
40 gen w2 = 0 if resp==1
41 replace w2 = 1 if resp==2
42
43 * Generate a satisfaction indicator, uncorrelated with effects just for illustration
44 gen x = cond(uniform()>=0.3,1,0) if resp==1 & t==1
45 by id : egen _x = min(x)
46 *Create dummy variables
47 gen x1 = 1 if _x==1
48 replace x1 = 0 if _x==0
49 gen x2 = 0 if _x==1
50 replace x2 = 1 if _x==0

```

```

1
2
3
4
5
6
7
8
9
10
11
12
13
14
15
16
17
18
19
20
21
22
23
24
25
26
27
28
29
30
31
32
33
34
35
36
37
38
39
40
41
42
43
44
45
46
47

drop x _x

* Predict response
gen y = (`b0' + u0)* w1 + (`b1' + u1)* w1 * t + e1* w1 + ///
        (`b2' + u2)* w2 + (`b3' + u3)* w2 * t + e2* w2 //

tempfile simdata
save `simdata' , replace

}
*****
* 2.1 Existing Methods (n.b. only for first response)
*****
use `simdata' , clear
* Working with the first and last measurement occassion
keep if t ==0 | t==3
sort id resp t
by id resp : gen d_y = y[_n] - y[_n-1]

*****
* 2.1.1 Existing RTN
*****
{
    sum y if t==0 & resp==1
    local rtn = r(mean) + 2*r(sd)
    by id resp: gen ex_rtn =cond(y>=`rtn',1 ,0) if _n==2 & resp==1
    by id resp: gen ex_rci = cond((d_y / sqrt(2*(`r(sd)' * sqrt(1-0.9))^2))>=1.96,1,0) if _n==2 & resp==1
    by id resp: gen ex_rtn_rci = cond(ex_rtn==1 & ex_rci==1 ,1,0) if _n==2 & resp==1

    tab ex_rtn if resp==1 // Number of individuals returning to normal
    tab ex_rci if resp==1 // Number of individuals significant change
    tab ex_rtn_rci if resp==1 // Number of individuals significant change & returning to normal
}

*****
* 2.1.2 Existing MID
*****
{
sum y if t==0 & resp==1
local mid = r(sd)*0.5
by id resp : gen ex_mid =cond(d_y>=`mid',1,0) if _n==2 & resp==1

tab ex_mid if resp==1 // Number of individuals with minimally important difference
}

*****
* 2.1.3 Existing MCID
* n.b using the 25th centile is pain is reverse coded.
*****
{
centile d_y if resp==1 & x1==1 , c(25)
}

```

```

1
2
3     local mcid = r(c_1)
4       by id resp: gen ex_mcid = cond(d_y>=`mcid',1,0) if _n==2 & resp==1
5
6         tab ex_mcid if resp==1           // Number of individuals meeting the MCID criteria
7     }
8
9     *****
10    * 2.1.4 Existing (OO) OMERACT-OARSI
11    *****
12    {
13    * 50% relative, 20% absolute single
14    * 20% relative, 10% absolute both
15
16    * Calculate Relative Change
17    by id resp: gen d_rely= (d_y/y[_n-1])*100
18      * Mark Single Changes
19      by id resp: gen ex_oo_single =1 if (d_y>=20 & d_y<.) | (d_rely>=50 & d_rely<.) & _n==2
20      * Mark Double Changes
21      by id resp: gen ex_oo_double =1 if (d_y>=10 & d_y<.) | (d_rely>=20 & d_rely<.) & _n==2
22      * Sum double changes
23      by id : egen ex_oo_double_sum = total(ex_oo_double) if d_y!=.
24
25    * Mark OO criteria
26    by id : gen _ex_oo = cond(ex_oo_single==1 | ex_oo_double_sum==2 , 1,0) if d_y!=.
27    by id : egen ex_oo = max(_ex_oo) if d_y!=.
28
29    tab ex_oo if resp==1 // Number of individuals meeting the oo criteria
30  }
31  *****
32  * 2.2 Multi-level Methods
33  *****
34  // Set the global macro to identify the location and version of mlwin
35  global MLwiN_path "C:\Program Files (x86)\MLwiN v2.36\i386\MLwiN.exe"
36  use `simdata' , clear
37  keep if resp==1
38
39  * Create a constant
40  gen cons=1
41
42  *****
43  * 2.2.1 MLM RTN / MID Model
44  *****
45  {
46  *
47  *           0-----1
48  *           1,2,3,4,5,6,7,8,9,0,1,2,3,4,5,6,7,8,9,0,
49  matrix a = (1,1,1)
50
51  runmlwin y cons t if resp==1 ,                               /// Fixed effect
52    levell(t: cons, residuals(_e, ) )                          /// Level 1 variance
53    level2(id: cons t, elements(a) residuals(_u, ) )          /// Level 2 varaince

```

```

1
2
3           maxiterations(10)  corr sd nopause           //           Modelling options
4
5 * Predict Individual effects
6 gen xb_fe = _b[cons] + _b[t]*t
7           gen xb_re = _u0 + _u1*t
8           gen xb = xb_fe + xb_re
9
10 * Predict to asses responsiveness at (3month)
11 gen xb_t = (_b[cons]+_u0) + (_b[t]+_u1)*3
12
13 * RTN threshold
14 local mlm_rtn = _b[FP1:cons] + 2*( _b[RP2:var(cons)]^0.5)
15
16 * Mark RTN
17 gen mlm_rtn = cond(xb_t>=`mlm_rtn',1,0)
18
19 * Calculate RCI
20 gen xb_d = _b[FP1:t] + _u1
21           gen se_d = (_se[FP1:t]^2 + _u1se^2)^0.5
22           gen z_d = xb_d / se_d
23
24 * Mark RCI
25 gen mlm_rci = cond(z_d>=1.96,1,0)
26
27 * Mark RTN RCI composite
28 gen mlm_rtn_rci = cond(mlm_rtn==1 & mlm_rci==1, 1, 0)
29           egen pickone = tag(id)
30
31           tab mlm_rtn_rci if pickone==1 // Number of individuals meeting the MLM RTN RCI  criteria
32 }
33 *****
34 * 2.2.2 MLM MID
35 *****
36 {
37 * MID Threshold @ 3 months
38 local mlm_mid = 0.5*( _b[RP2:var(cons)]^0.5)
39           gen mlm_mid = cond( (_b[t]+_u1)*3>= `mlm_mid' ,1,0 )
40           tab mlm_mid if pickone==1 // Number of individuals meeting the MLM MID criteria
41
42 * Drop previous residual and predictions
43 drop _u0 _u1 _u0se _u1se _e0 _e0se  xb_fe xb_re xb xb_t xb_d se_d z_d
44 }
45 *****
46 * 2.2.3 MLM MCID
47 *****
48 {
49 * Stratify intercept and slope by satisfaction
50 gen consx1= cons*x1
51           gen consx2 = cons*x2
52
53
54
55
56
57
58
59
60
61
62
63
64
65
66
67
68
69
70
71
72
73
74
75
76
77
78
79
80
81
82
83
84
85
86
87
88
89
90
91
92
93
94
95
96
97
98
99

```

```

1
2
3           gen tx1 = t*x1
4           gen tx2 = t*x2
5
6 * Specify RE variance matrix
7 *           0-----1-----2
8 *           1,2,3,4,5,6,7,8,9,0,1,2,3,4,5,6,7,8,9,0,1
9 matrix u = (1,1,1,0,0,1,0,0,1,1)
10
11 * Specify RE variance matrix
12 *           0-----1-----2
13 *           1,2,3,4,5,6,7,8,9,0,1,2,3,4,5,6,7,8,9,0,1
14 matrix e = (1,0,1)
15
16 runmlwin y consx1 tx1 consx2 tx2 if resp==1 , // Fixed effect
17           level1(t: consx1 consx2, elements(e) residuals(_e, norecode)) // Level 1 variance
18           level2(id: consx1 tx1 consx2 tx2 ,elements(u) residuals(_u, norecode)) // Level 2 variance
19           maxiterations(10) corr sd nopause // Modelling
20 options
21
22 * Estimate the Change for all individuals
23 gen xb_slope = (_b[tx1]+_u1)*x1 + (_b[tx2]+_u3)*tx2
24
25 * Find the 75th (inverse coding 25th) centile of those satisfied
26 centile xb_slope if tx1==3 , c(25)
27 local mlm_mcid = r(c_1)
28
29 *tag observations which have improvements greater than mcid
30 gen mlm_mcid = cond(xb_slope>=`mlm_mcid',1,0) if t==3
31 tab mlm_mcid if t==3 // Number of individuals meeting the MCID criteria
32 }
33 *****
34 * 2.2.4 MLM (OO) OMERACT-OARSI
35 *****
36 {
37 * 50% relative, 20 absolute single assuming a 0-100 score
38 * 20% relative, 10 absolute both assuming a 0-100 score
39 use `simdata' , clear
40 sort id t resp
41
42
43 * Create response indicators
44 gen cons =1
45 gen consw1 = cons*w1
46 gen consw2 = cons*w2
47 gen tw1 = t*w1
48 gen tw2 = t*w2
49
50 runmlwin y consw1 tw1 consw2 tw2 , // Fixed Effect
51           level1(resp:) // Level 1 variance
52
53
54
55
56
57
58
59
60
61
62
63
64
65
66
67
68
69
70
71
72
73
74
75
76
77
78
79
80
81
82
83
84
85
86
87
88
89
90
91
92
93
94
95
96
97
98
99

```

```

1
2
3      level2(t: consw1 consw2, residuals(_e, norecode ))          /// Level 2 variance
4      level3(id: consw1 tw1 consw2 tw2 , residuals(_u, norecode ))  /// Level 3 variance
5      maxiterations(10) corr sd nopause                          //      Modelling options
6
7  * Calculate predicted changes
8  gen mlm_d = (_b[tw1] + _u1 )*tw1 + (_b[tw2] + _u3 )*tw2
9      gen mlm_b1 = (_b[consw1] + _u0)*consw1 + (_b[consw2] + _u2)*consw2
10     gen mlm_relyd= (mlm_d /mlm_b1)*100
11
12  * Mark out responders
13     by id resp ,sort: gen mlm_oo_single =1 if (( mlm_d>=20 & mlm_d<.) | (mlm_relyd>=50 & mlm_relyd<.) ) & t==3
14     * Mark Double Changes
15     by id resp ,sort: gen mlm_oo_double =1 if ((mlm_d>=10 & mlm_d<.) | (mlm_relyd>=20 & mlm_relyd<.) ) & t==3
16     * Sum double changes
17     by id ,sort : egen mlm_oo_double_sum = total(mlm_oo_double) if t==3
18
19  * Mark OO criteria
20  by id : gen _mlm_oo = cond(mlm_oo_single==1 | mlm_oo_double_sum==2 , 1,0) if t==3
21     by id : egen mlm_oo = max(_mlm_oo) if t==3
22
23     tab mlm_oo if resp==1 // Number of individuals meeting the MLM OO criteria
24
25
26
27
28
29
30
31
32
33
34
35
36
37
38
39
40
41
42
43
44
45
46
47

```

# BMJ Open

**A unified multi-level model approach to assessing patient responsiveness including; return to normal, minimally important differences, and minimal clinical important improvement for patient reported outcome measures.**

|                                 |                                                                                                                                                                                                                                                                                                                                                                                                                                                                                                                                                                                                                                                                                                                                         |
|---------------------------------|-----------------------------------------------------------------------------------------------------------------------------------------------------------------------------------------------------------------------------------------------------------------------------------------------------------------------------------------------------------------------------------------------------------------------------------------------------------------------------------------------------------------------------------------------------------------------------------------------------------------------------------------------------------------------------------------------------------------------------------------|
| Journal:                        | <i>BMJ Open</i>                                                                                                                                                                                                                                                                                                                                                                                                                                                                                                                                                                                                                                                                                                                         |
| Manuscript ID                   | bmjopen-2016-014041.R2                                                                                                                                                                                                                                                                                                                                                                                                                                                                                                                                                                                                                                                                                                                  |
| Article Type:                   | Research                                                                                                                                                                                                                                                                                                                                                                                                                                                                                                                                                                                                                                                                                                                                |
| Date Submitted by the Author:   | 10-May-2017                                                                                                                                                                                                                                                                                                                                                                                                                                                                                                                                                                                                                                                                                                                             |
| Complete List of Authors:       | Sayers, Adrian; University of Bristol, Musculoskeletal Research Unit<br>Wylde, Vikki; University of Bristol, School of Clinical Sciences<br>Lenguerrand, Erik; University of Bristol School of Clinical Science, School of Clinical Sciences, Musculoskeletal Research Unit<br>Goberman-Hill, Rachael; University of Bristol, School of Clinical Sciences<br>Dawson, Jill; University of Oxford, Department of Public Health<br>Beard, David; University of Oxford, Nuffield Dept of Orthopaedics, Rheumatology and Musculoskeletal Sciences<br>Price, Andrew; University of Oxford, Nuffield Department of Orthopaedics, Rheumatology and Musculoskeletal Sciences<br>Blom, Ashley; University of Bristol, School of Clinical Sciences |
| <b>Primary Subject Heading</b>: | Research methods                                                                                                                                                                                                                                                                                                                                                                                                                                                                                                                                                                                                                                                                                                                        |
| Secondary Subject Heading:      | Rheumatology, Epidemiology, Patient-centred medicine                                                                                                                                                                                                                                                                                                                                                                                                                                                                                                                                                                                                                                                                                    |
| Keywords:                       | Patient Responsiveness, Multi-level Modelling, Return To Normal, Minimal Important Difference, Patient-reported outcomes, Minimal clinical important improvement                                                                                                                                                                                                                                                                                                                                                                                                                                                                                                                                                                        |
|                                 |                                                                                                                                                                                                                                                                                                                                                                                                                                                                                                                                                                                                                                                                                                                                         |

SCHOLARONE™  
Manuscripts

1  
2  
3 **A unified multi-level model approach to assessing patient responsiveness including; return to**  
4 **normal, minimally important differences, and minimal clinical important improvement for patient-**  
5 **reported outcome measures.**  
6  
7  
8  
9

10 Sayers A<sup>1,2</sup>, Wylde V<sup>1</sup>, Lenguerrand E<sup>1</sup>, Gooberman-Hill R<sup>1</sup>, Dawson J<sup>3</sup>, Beard D<sup>4</sup>, Price A<sup>4</sup>, Blom AW<sup>1</sup>

13 Address for Correspondence

14  
15  
16 Adrian Sayers, Musculoskeletal Research Unit, School of Clinical Sciences, University of Bristol,  
17  
18 Learning and Research Building (Level 1), Southmead Hospital, Westbury on Trym, Bristol, BS10 5NB  
19

20  
21 E-mail: [adrian.sayers@bristol.ac.uk](mailto:adrian.sayers@bristol.ac.uk)  
22

23  
24 Tel: 44 (0)117 4147880; Fax + 44(0)117 414 7924  
25  
26

- 27 1. Musculoskeletal Research Unit, School of Clinical Sciences, University of Bristol, Southmead  
28 Hospital, Westbury On Trym, Bristol, BS10 5NB (AS, VW, EL, RGH, AWB).
- 29 2. School of Social and Community Medicine, University of Bristol, 39 Whatley Road, Bristol,  
30 BS8 2PS.
- 31 3. Nuffield Department of Population Health, University of Oxford, Old Road Campus,  
32 Headington, Oxford OX3 7LF, UK (DB, AP).
- 33 4. Biomedical Research Unit, Nuffield Department of Orthopaedics, Rheumatology and  
34 Musculoskeletal Science, Nuffield Orthopaedic Centre, Windmill Road, Oxford, OX2 9JA (JD).

35  
36  
37  
38  
39  
40  
41  
42  
43  
44  
45 Word Count 4010  
46  
47  
48  
49  
50

51  
52 Keywords: Patient Responsiveness, Multi-level Modelling, Return To Normal, Minimal Important  
53 Difference, Minimal Clinically Important Difference, Patient-reported outcomes, Clinical significance  
54  
55 Anchor-based methods; Distribution-based methods  
56  
57  
58  
59  
60



**Abstract (271 Words)**

## Objective

This article reviews and compares four commonly used approaches to assess patient responsiveness to a treatment or therapy [Return To Normal (RTN), Minimal Important Difference (MID), Minimal Clinically Important Improvement (MCII), OMERACT-OARSI (OO)], and demonstrates how each of the methods can be formulated in a multi-level modelling (MLM) framework.

## Design

## Cohort Study

## Setting

A cohort of patients undergoing total hip and knee replacement were recruited from a single UK NHS hospital.

## Population

400 Patients from The Arthroplasty Pain Experience (APEX) cohort study undergoing total hip (n=210) and knee (n=190) replacement who completed the Intermittent and Constant Osteoarthritis Pain (ICOAP) questionnaire prior to surgery and then at 3, 6 and 12 months after surgery.

## Primary Outcomes

The primary outcome was defined as a response to treatment following total hip or knee replacement. We compared baseline scores, change scores, and proportion of individuals defined as “responders” using traditional and MLM approaches to patient responsiveness.

## Results

Using existing approaches, baseline and change scores are underestimated, and the variance of baseline and change scores overestimated in comparison to MLM approaches. MLM increases the proportion of individuals defined as responding in RTN, MID, and OO criteria compared to existing approaches. Using MLM with the MCII criteria reduces the number of individuals identified as responders.

## Conclusion

1  
2  
3  
4  
5  
6  
7  
8  
9  
10  
11  
12  
13  
14  
15  
16  
17  
18  
19  
20  
21  
22  
23  
24  
25  
26  
27  
28  
29  
30  
31  
32  
33  
34  
35  
36  
37  
38  
39  
40  
41  
42  
43  
44  
45  
46  
47  
48  
49  
50  
51  
52  
53  
54  
55  
56  
57  
58  
59  
60

MLM improves the estimation of the standard deviation of baseline and change scores by explicitly incorporating measurement error into the model, and avoiding regression to the mean when making individual predictions. Using refined definitions of responsiveness may lead to a reduction in misclassification when attempting to predict who does and does not respond to an intervention, and clarifies the similarities between existing methods.

For peer review only

## Article Summary

### Strengths and limitations of this study

- Four different approaches to patient responsiveness can be unified into a multi-level model.
- A multi-level model framework of patient responsiveness highlights the similarities and differences between existing methods.
- Multi-level models provide a simple framework which incorporates measurement error and non-linear change in trajectories of patient recovery.
- Multi-level models are technically more demanding than existing formulations of patient responsiveness, and convergence is not guaranteed.
- Multi-level models does not improve the arbitrary placement of the thresholds that define responsiveness in comparison to existing methods

## INTRODUCTION

Joint replacement is an increasingly common elective procedure worldwide<sup>1-3</sup> and improving patient-reported outcomes after joint replacement is a key research priority due to the high prevalence of poor outcomes after joint arthroplasty.<sup>4</sup> Poor outcomes include continuing pain, functional limitations,<sup>5</sup> and increased healthcare utilisation.<sup>6</sup> However, there is some debate on how the efficacy of interventions can be judged due to the variety of different outcomes used in orthopaedic research.<sup>7-18</sup> Traditionally, objective primary outcomes such as prosthetic survivorship and mortality rates were used.<sup>19</sup> However, more recently there has been a shift in focus which ensures that patients' perspective is central to the assessment of intervention success.<sup>20</sup> Many studies now use patient-reported outcome measures (PROMs) as endpoints, and these tools can assess a variety of health outcomes, including pain,<sup>7,21</sup> physical functioning,<sup>7</sup> mental well-being<sup>22</sup> and health-related quality of life.<sup>23</sup>

Although PROMs are widely used,<sup>4</sup> there is still debate in how the results should be interpreted and how to define a clinically meaningful change.<sup>24-35</sup> From a measurement perspective, the ability to estimate if a change has occurred depends on the application of an appropriate statistical model. From a clinical perspective, some authors suggest that the average statistical change is insufficient to "tell you anything about an individual's chances of improving".<sup>36</sup> Therefore, the utility of simple statistical analyses are limited when attempting to help patients weigh up the risks and benefits of undergoing surgery.

In order to supplement simple statistical analysis, many researchers attempt to dichotomise the population into those who have or have not responded to an intervention, creating a two-stage process of defining an outcome. There are a number of different methods (definitions) that can be used to dichotomise the population, and these secondary analyses are collectively referred to as responsiveness analyses.<sup>36</sup> Four substantively different methods of estimating the proportion of individuals who respond to an intervention have been previously identified in orthopaedic

1  
2  
3 research:<sup>36</sup> 1) Return to Normal (RTN), 2) Distribution-based Minimally Important Difference (MID),  
4  
5 3) Anchor-based Minimal Clinically Important Difference (MCII), and 4) the OMERACT-OARSI (OO)  
6  
7 responder criteria. The first three approaches are generic and used in many fields of health research,  
8  
9 whereas the fourth approach is specific to orthopaedic research, but in principle could be used in  
10  
11 many fields of health research.  
12

13  
14 Each of these approaches is often thought to be methodologically distinct. However, all of the  
15  
16 methods can be shown to be special cases of a multi-level model (MLM). MLM have been used in a  
17  
18 wide variety of contexts ranging from growth modelling to modelling educational data. One of the  
19  
20 principal reasons to use MLM is to take advantage of the direct estimation of different variance  
21  
22 components<sup>37</sup> and provide efficient and unbiased estimates of fixed and random effects.<sup>38</sup>  
23  
24

25  
26 Despite a number of extensive reviews of patient responsiveness,<sup>31 33 39 40</sup> we will describe these four  
27  
28 approaches to calculating responsiveness and highlight the substantively different decisions each  
29  
30 method makes. We will then describe how each approach can be translated into a MLM framework,  
31  
32 emphasising the benefits of the translation, and contrast the approaches using an example from the  
33  
34 APEX cohort study.<sup>41</sup>  
35  
36  
37  
38  
39  
40  
41  
42  
43  
44  
45  
46  
47  
48  
49  
50  
51  
52  
53  
54  
55  
56  
57  
58  
59  
60

## METHODS

We outline the four existing approaches to patient responsiveness previously used in orthopaedic research<sup>36</sup>, and describe their potential limitations, and how they can be formulated in a MLM framework.

### Review of existing approaches to responsiveness

Return to normal (RTN)<sup>26</sup> suggests that an individual has returned to 'normal' if their score on a post-intervention outcome is greater than two standard deviations (SD) from the mean baseline response.

The use of two standard deviations appears to be justified on theoretical grounds, however it is quite arbitrary. Assuming scores are normally distributed and measured without error, two SD's corresponds to a 95.5% prediction interval for the mean, which is similar to the equally arbitrary and much-criticised significance threshold  $p=0.05$  (Type I error=0.05) criterion used throughout medical research<sup>42 43</sup>. However, there is no reason why a 1.6 or a 2.6 SD cut-offs should not be used in preference, which corresponds to 90% and 99% prediction intervals.

The method also assumes the observed change is unlikely to be due to chance alone and does not account for any uncertainty. In order to alleviate this problem the use of the Relative Change Index (RCI) was proposed to be used in conjunction with the RTN classification.<sup>24 27</sup> The RCI constructs a test of the individual's score at follow-up compared to their baseline, where the standard error of the difference is estimated indirectly using the SD of the baseline score and an assumed reliability coefficient from empirical research or a range of reliability values in the spirit of a sensitivity analysis.

A commonly described distribution-based Minimally Important Difference (MID) method classifies individuals as responders if their observed change is greater than a fixed proportion of the SD of the pre-surgery score.<sup>30</sup> There has been much debate about the exact size, or proportion, of the SD change score to use, however 0.5 SD's has been reported widely and suggested to be a difference

1  
2  
3 that is minimally perceptible to patients.<sup>30</sup> Any individual with a change score greater than 0.5 SD of  
4  
5 the baseline score is defined as responding to the treatment. Similar to the RTN criteria, the decision  
6  
7 to use 0.5 is arbitrary and there is no reason why more or less stringent criteria of 0.25, 1 or 2 SD's  
8  
9 could not be used. Additionally, there is no reason why a test such as the RCI should not be  
10  
11 conducted to check that change is beyond the bounds of measurement error.  
12

13  
14 Anchor-based Minimal Clinically Important Improvement (MCII) is similar to the MID approach, in  
15  
16 that it defines an individual as a responder based on their individual change score. However, the cut-  
17  
18 point is determined in individuals who report themselves as having an outcome which is either  
19  
20 good/satisfactory or perceived as improved from baseline using an external anchoring question. The  
21  
22 authors proposed using a cut point at the 75th centile of the change score, in those who are  
23  
24 satisfied.<sup>34</sup> Therefore any individuals, whether they are satisfied or not, who has a change score  
25  
26 greater than the 75th centile are defined as responders. A closely related anchor-based metric is the  
27  
28 Patient Acceptable Symptom State (PASS),<sup>35</sup> the construction is similar to that of the MCII with the  
29  
30 exception that it is based on the final score of patients opposed to change. Conceptually the PASS is  
31  
32 more closely related to the RTN definition of responsiveness, and much of the criticism levied  
33  
34 against MCII and RTN can therefore be applied to the PASS.  
35  
36  
37

38  
39 The OMERACT-OARSI (OO) criteria<sup>32</sup> recognises that a response to an intervention may occur in one  
40  
41 or more different measured outcomes, i.e. a multivariate response mechanism. In keeping with  
42  
43 much of the orthopaedic literature they assume the proposed score has been rescaled between 0  
44  
45 and 100<sup>32</sup>, and that a responder is defined as any individual with 1. a  $\geq 50\%$  relative change or a  
46  
47  $\geq 20$  point absolute change on one or more responses scales, or 2. a  $\geq 20\%$  relative change or  $\geq 10$   
48  
49 point absolute change in two or more response scales. Relative change is defined as the ratio of the  
50  
51 change to the individual baseline score multiplied by 100. Unlike the RTN, MID, or MCII it is very  
52  
53 clear that the thresholds for relative and absolute changes are based on a panel of expert opinions  
54  
55 and are fixed.  
56  
57  
58  
59  
60

1  
2  
3 Despite the variety of existing approaches used to identifying responders, there are a number of  
4  
5 problems common to all methods. Common assumptions include: 1) Each observed outcome is  
6  
7 measured without error and reflects the true underlying patient's response, test-retest reliability  
8  
9 studies indicate that this is not a realistic assumption.<sup>44</sup> 2) Regression to the mean does not occur  
10  
11 and therefore the variance of the change score will not be overestimated. 3) Floor and ceiling effects  
12  
13 do not bias estimates of the variance of the change score.<sup>45</sup>  
14  
15

16  
17 Furthermore, in RTN, specific combinations of means and variances may result in a threshold beyond  
18  
19 the range of the measurement tool, therefore no individuals would be defined as responding to a  
20  
21 therapy. The MCII approach assumes the additional anchoring variable is measured without error  
22  
23 and the response trajectory is distinct from those who are unsatisfied.<sup>46</sup> The method also assumes a  
24  
25 two parameter logistic function is an appropriate model for the cumulative proportional rank of  
26  
27 patients and change in outcome, and that there is no uncertainty in the calculation of the threshold  
28  
29 .<sup>47</sup> Finally, the OO approach considers a response in two or more outcomes. However, it does not  
30  
31 explicitly describe how the correlation between the two outcomes is accounted for and fails to  
32  
33 recognise that if not modelled appropriately may introduce bias.<sup>48-50</sup>  
34  
35

36  
37 The four methods identified have a number of other limitations,<sup>25</sup> but they are difficult to compare  
38  
39 methods when presented as distinct approaches.  
40  
41

42 Embedding them in a unified statistical framework makes their underlying assumptions explicit,  
43  
44 whilst highlighting their similarities and differences. In addition, it provides a framework to  
45  
46 incorporate non-linear change, measurement error, and variability in the timing of measurement  
47  
48 occasions, all of which are to be expected in real word data collections and are critical when  
49  
50 attempting to asses a patients change at a specified point in time.  
51  
52

53  
54 Multi-level modelling approach to responsiveness  
55  
56  
57  
58  
59  
60



We now present a general multi-level model for patient responsiveness and show how the four approaches described above can be specified as special cases.

Under the assumption of linear change, the measured response ( $y$ ) at the  $i^{\text{th}}$  occasion for the  $j^{\text{th}}$  individual is modelled as a linear function of time.

Equation 1

$$y_{ij} = \beta_0 + u_{0j} + (\beta_1 + u_{1j})t_{ij} + \varepsilon_{ij}$$

$$\begin{bmatrix} u_{0j} \\ u_{1j} \end{bmatrix} \sim N(0, \Omega_u), \quad \Omega_u = \begin{bmatrix} \sigma_{u0}^2 & \\ \sigma_{u01} & \sigma_{u1}^2 \end{bmatrix}$$

$$[\varepsilon_{ij}] \sim N(0, \sigma_\varepsilon^2)$$

where  $t_{ij}$  is the time at which measurement  $i$  was taken on individual  $j$ , coded as zero at baseline.  $\beta_0$  is the baseline population average response, and  $u_{0j}$  represents the  $j^{\text{th}}$  individual difference from the baseline response. The sum of  $\beta_0 + u_{0j}$  is the estimated individual baseline response.  $\beta_1$  represents the population average change per unit increase in time, and  $u_{1j}$  represents the  $j^{\text{th}}$  individual difference from the population average change per unit increase in time. The sum of  $\beta_1 + u_{1j}$  is the estimated individual average change per unit increase in time. Measurement error in the linear trajectory is represented by  $\varepsilon_{ij}$ .

The variance in individual deviations from the population average response at baseline and average rate of change are  $\sigma_{u0}^2$  and  $\sigma_{u1}^2$  respectively. Furthermore, the correlation between baseline measurements and rate of change can be assumed to be independent or correlated by constraining  $\sigma_{u01}$  to be zero or allowing it to be freely estimated. The variances of the shrunken residuals  $\hat{u}_{0j}$  and  $\hat{u}_{1j}$ , also known as empirical bayes estimates, are typically less than the estimated population variances  $\hat{\sigma}_{u0}^2$  and  $\hat{\sigma}_{u1}^2$  as they shrink towards the population averages of  $\beta_0$  and  $\beta_1$ . The extent of the shrinkage depends on the number of measurement occasions and the within individual

1  
2  
3 variability, with greater shrinkage as the number of measurement occasions decrease and as the  
4  
5 within individual variance increases. A more detailed discussion of MLM can be found in most  
6  
7 advanced statistics textbooks.<sup>48 51 52</sup>  
8  
9

10  
11  
12  
13 We now describe how the four traditional approaches to measuring patient responsiveness can be  
14  
15 unified into a MLM framework. General benefits of the MLM over existing approaches include: 1)  
16  
17 with more than three measurement occasions a MLM directly allows for measurement error,  $\varepsilon_{ij}$ ; 2)  
18  
19 the use of shrunken residuals  $\widehat{u}_{0j}$  and  $\widehat{u}_{1j}$  allow for regression to the mean when predicting an  
20  
21 individual's score<sup>53</sup>; 3) MLM can be extended to include multivariate response models which  
22  
23 appropriately model the correlation between two or more outcomes; and 4) MLM allows for  
24  
25 variability in the timing of measurement occasions. Fundamentally, the MLM approach recognises  
26  
27 that observed patient responses are subject to error, and therefore the true patient's response  
28  
29 following an intervention must be estimated.  
30  
31  
32

33  
34 *MLM-Return To Normal.* In order to apply the RTN criteria using a MLM approach we first estimate  
35  
36 the baseline population SD in individuals considered to be abnormal using the model described in  
37  
38 Equation 1. Assuming  $y_{ij}$  is normally distributed at baseline with a population mean  $\beta_0$  and variance  
39  
40  $\sigma_{u0}^2$  a  $100 \cdot \left(1 - \frac{\alpha}{2}\right)$  prediction interval for the baseline measurement can be constructed i.e.  
41  
42  $\left[\beta_0 - \sigma_{u0}z_{\left(1-\frac{\alpha}{2}\right)}, \beta_0 + \sigma_{u0}z_{\left(1-\frac{\alpha}{2}\right)}\right]$  where  $\alpha$  is the type I error rate and  $z$  is the critical value from a  
43  
44 standard normal distribution. Importantly  $y_{ij}$  is not assumed to be measured without error and  
45  
46 therefore estimates of  $\sigma_{u0}^2$  are less likely to be biased than using simple methods. However, it is  
47  
48 important to note that the choice of  $\alpha$  is entirely that of the researcher, and whilst  $\alpha = 0.05$  (leading  
49  
50 to  $z = 1.96 \approx 2$ ) is common, more or less stringent criteria could be applied.  
51  
52  
53  
54

55  
56 The second step is to estimate the score of the individual at time  $j$  following surgery and determine if  
57  
58 it is within the baseline prediction interval. This prediction is simply calculated by substituting  
59  
60

estimates of  $\beta_0$ ,  $\beta_1$ ,  $u_{0j}$  and  $u_{1j}$  into Equation 1, to give the empirical best linear unbiased prediction (eBLUP) for the  $j^{\text{th}}$  individual at the  $i^{\text{th}}$  occasion.<sup>54</sup>

Finally, in order to determine whether or not the response of the individual following surgery is greater than one would attribute to chance alone, i.e. the null hypothesis that the  $j^{\text{th}}$  individual's slope is not equal to zero, a test statistic similar to RCI should be conducted,

$$(\hat{\beta}_1 + \hat{u}_{1j})/SE(\hat{\beta}_1 + \hat{u}_{1j}), \text{ where } SE(\hat{\beta}_1 + \hat{u}_{1j}) = \sqrt{VAR(\hat{\beta}_1) + VAR(\hat{u}_{1j})}.$$

*MLM-Minimally Important Difference.* The threshold of minimally important difference can also be estimated using a MLM. Similar to RTN, a linear model of change is applied, as in Equation 1. Then the population SD of the baseline response is estimated by  $\sigma_{u0}$ . By comparing the estimated change for the  $j^{\text{th}}$  individual  $(\hat{\beta}_1 + \hat{u}_{1j})t$  to the baseline standard deviation, i.e.  $\sigma_{u0}/2$ , the individual can be classed as a responder or not. The MID approach does not specifically state whether a test of whether an individual's change scores is less than the MID threshold should be conducted, but a test

statistic is simply constructed as  $\left( (\hat{\beta}_1 + \hat{u}_{1j})t - \left( \frac{\sigma_{u0}}{2} \right) \right) / (SE(\hat{\beta}_1 + \hat{u}_{1j})t)$ .

*MLM-Minimally Clinically Important Improvement.* The MLM MCII requires a simple extension of the univariate model presented previously (Equation 1). The outcome of interest is stratified using an external criterion. The stratification is achieved by creating dummy variables for those who are un/satisfied with some aspect of their treatment i.e.  $x_{1i}$  takes the values 0 and 1 representing unsatisfied and satisfied individuals respectively, and  $x_{2i} = 1 - x_{1i}$ . These dummy variables are then included as additional explanatory variables, with no overall model intercept, and interacted with  $t$ .

Equation 2

$$y_{ij} = (\beta_0 + u_{0j})x_{1i} + (\beta_1 + u_{1j})t_{ij}x_{1i} + \varepsilon_{1ij}x_{1i} \\ + (\beta_2 + u_{2j})x_{2i} + (\beta_3 + u_{3j})t_{ij}x_{2i} + \varepsilon_{2ij}x_{2i}$$

$$\begin{bmatrix} u_{0j} \\ u_{1j} \\ u_{2j} \\ u_{3j} \end{bmatrix} \sim N(0, \Omega_u): \quad \Omega_u = \begin{bmatrix} \sigma_{u0}^2 & & & \\ \sigma_{u01} & \sigma_{u1}^2 & & \\ 0 & 0 & \sigma_{u2}^2 & \\ 0 & 0 & \sigma_{u23} & \sigma_{u3}^2 \end{bmatrix}$$

$$\begin{bmatrix} \varepsilon_{1ij} \\ \varepsilon_{2ij} \end{bmatrix} \sim N(0, \Omega_\varepsilon): \quad \Omega_\varepsilon = \begin{bmatrix} \sigma_{\varepsilon1}^2 & \\ 0 & \sigma_{\varepsilon2}^2 \end{bmatrix}$$

Therefore  $\beta_0$  and  $\beta_2$  are the mean population outcome score at baseline for those who are satisfied and unsatisfied respectively, and  $\beta_1$  and  $\beta_3$  are the corresponding mean population changes per unit of time. Variances and covariances are similarly interpreted for those who are satisfied and unsatisfied respectively. However, that satisfaction on the external anchoring question is assumed to be known without error, and individual effects and errors for  $x_{1i}$  are uncorrelated with those for  $x_{2i}$  because the satisfied and unsatisfied categories are mutually exclusive. Whether or not it is desirable to fit a model to both satisfied and unsatisfied individuals simultaneously is debateable, as only those who are satisfied contribute to the definition of MCII. However, we present a simultaneous modelling approach to satisfied and unsatisfied individuals as it make the underlying modelling assumptions explicit. Furthermore, if the stratification on satisfaction status leads to a small samples alternative estimators and degree of freedom can be used in a MLM framework to account for this i.e. restricted maximum likelihood, restricted generalised least squares, or adjustments to the denominator degrees of freedom.<sup>55</sup>

Following the prediction of each individual's trajectory, including those unsatisfied with treatment, the second stage in the MCII method requires a threshold for determining responsiveness. Using a similar suggestion to Tubach et al.,<sup>35</sup> the 75<sup>th</sup> centile of those who are satisfied could be used to classify all individuals as responding or not. Similar to the MID there is no suggestion of whether a

test against the null value of the 75<sup>th</sup> centile should be constructed, but this is easily done within the MLM framework.

*MLM-OMERACT-OARSI criteria.* The OO criteria can be similarly extended into a multi-variate MLM framework by the inclusion of dummy variables and reshaping into a “double” long format with both responses stored in a single vector. Figure 1 illustrates the data structure for a bivariate model.

Dummy variables, also known as response indicators, are used to denote the response options:  $w_{1i}$  is coded 1 for the first measurement outcome (pain) and 0 for the second outcome (function), and  $w_{2i} = 1 - w_{1i}$ . The response indicators and their interactions with  $t$  are included as explanatory variables to obtain the following bivariate response model.

Equation 3

$$y_{ij} = (\beta_0 + u_{0j})w_{1i} + (\beta_1 + u_{1j})t_{ij}w_{1i} + \varepsilon_{1ij}w_{1i} \\ + (\beta_2 + u_{2j})w_{2i} + (\beta_3 + u_{3j})t_{ij}w_{2i} + \varepsilon_{2ij}w_{2i}$$

$$\begin{bmatrix} u_{0j} \\ u_{1j} \\ u_{2j} \\ u_{3j} \end{bmatrix} \sim N(0, \Omega_u): \quad \Omega_u = \begin{bmatrix} \sigma_{u0}^2 & & & \\ \sigma_{u01} & \sigma_{u1}^2 & & \\ \sigma_{u02} & \sigma_{u12} & \sigma_{u2}^2 & \\ \sigma_{u03} & \sigma_{u13} & \sigma_{u23} & \sigma_{u3}^2 \end{bmatrix}$$

$$\begin{bmatrix} \varepsilon_{1ij} \\ \varepsilon_{2ij} \end{bmatrix} \sim N(0, \Omega_\varepsilon): \quad \Omega_\varepsilon = \begin{bmatrix} \sigma_{\varepsilon1}^2 & \\ \sigma_{\varepsilon12} & \sigma_{\varepsilon2}^2 \end{bmatrix}$$

With a similar functional form to the univariate MLM, there are separate population and individual intercepts for the first and second outcome ( $\beta_0, \beta_2$  and  $u_{0j}, u_{2j}$  respectively), and separate population and individual slopes are estimated for the second outcome ( $\beta_1, \beta_3$  and  $u_{1j}, u_{3j}$ ).

Using a MLM approach the outcomes are modelled jointly, which allows for non-zero covariances

1  
2  
3 between the intercepts and slopes of the two responses ( $\sigma_{u02}, \sigma_{u12}, \sigma_{u03}, \sigma_{u13}$ ). The measurement  
4  
5 errors for the two responses are not assumed to be independent, with their covariance directly  
6  
7 estimated ( $\sigma_{\varepsilon12}$ ).  
8  
9

10 Finally, the threshold of response must be decided and individual trajectories estimated and  
11  
12 classified. Similar to the other methods it is relatively simple to construct a test statistic for testing  
13  
14 whether individual slopes are significantly different from the chosen threshold.  
15  
16

17 *Limitations of the MLM approach.* The MLM approach described by Equation 1, Equation 2 and 3  
18  
19 assumes that change in the outcome is linearly associated with time. The linearity assumption is  
20  
21 imposed for simplicity. Non-linear changes are easily incorporated by including higher order  
22  
23 polynomials or using linear or non-linear splines.<sup>56</sup>  
24  
25

26  
27 The standard MLM approach also fails to directly address the issue of floor and ceiling effects.  
28  
29 Mixed response multi-level Tobit models allow for such effects and provide some adjustment.<sup>45 57</sup>  
30  
31 Furthermore, whilst the MLM described in Equation 2 allow for heterogeneity in known groups, they  
32  
33 fail to allow for heterogeneity in trajectories when the groups are unknown. The use of group-based  
34  
35 trajectory models or growth mixture models in these circumstances may reveal latent (unobserved)  
36  
37 classes of individuals with distinct patterns of recovery.<sup>58</sup>  
38  
39  
40  
41  
42  
43  
44  
45  
46  
47  
48  
49  
50  
51  
52  
53  
54  
55  
56  
57  
58  
59  
60

1  
2  
3 Example: The APEX cohort Study  
4

5  
6 Using a mixed cohort of patients undergoing THR and TKR,<sup>41</sup> we investigated the performance of the  
7  
8 existing and MLM approaches using four definitions of responsiveness. A simulated dataset and code  
9  
10 to fit each of these models are included in the supplementary material.  
11

12  
13 Patients in the APEX cohort completed the Intermittent and Constant Osteoarthritis Pain (ICOAP)  
14  
15 questionnaire before and after surgery at approximately 0, 3, 6 and 12 months. The date at which  
16  
17 the post-surgical questionnaire was completed is recorded in days post-surgery. As the name  
18  
19 suggests, the ICOAP questionnaire attempts to measure intermittent and constant pain.<sup>21</sup> The  
20  
21 developers of the tool suggest three ways of summarising the scale to generate an intermittent,  
22  
23 constant and total pain scores (the sum of the intermittent and constant pain subscales). The tool is  
24  
25 scored between 0 and 100 and a full description of the ICOAP scale is provided in the original  
26  
27 validation paper.<sup>21</sup> Satisfaction of pain relief following surgery was recorded by asking patients to  
28  
29 “Rate the relief of pain provided by (hip/knee) replacement?” using a single item 5 point scale  
30  
31 (None, Poor, Fair, Good, Excellent). We categorised good and excellent as a satisfactory outcome  
32  
33 following surgery.  
34  
35

36  
37  
38 Using the three methods of aggregation, we present estimates of pain at baseline and for change at  
39  
40 approximately 3 months post-surgery using existing methods (summary statistics) and MLM  
41  
42 estimates.  
43  
44

45  
46 In order to facilitate comparisons between existing and MLM approaches we assume that all  
47  
48 individuals are measured at exactly 0, 3, 6, and 12 months. Whilst the existing approaches only  
49  
50 utilises the 0 and 3-month measurements the MLM approach uses a random intercept and random  
51  
52 slopes across 4 measurements occasions, using two linear splines with a knot point at 3 months to  
53  
54 estimate the response at 3 months. The inclusion of the second spline and the additional two  
55  
56 measurement occasions allows adjustment for measurement error in the MLM approach. Table 1  
57  
58  
59  
60

1  
2  
3 and 2 presents results for patients undergoing THR and TKR respectively. The placement of the knot  
4  
5 at 3 months was determined by visually inspecting the data, similar to the methods by Lenguerrand  
6  
7 et al.<sup>59</sup> With more complex patterns of response an iterative model fitting approach is likely to be  
8  
9 required to determine the optimal knot placement. Modelling assumptions were checked using  
10  
11 ladder plots, and normal plots of residuals.  
12

13  
14 To describe how the responsiveness classification in patients changed at 3 months, we used an Exact  
15  
16 McNemar test to compare the number of discordant classifications generated by existing and MLM  
17  
18 approaches.  
19

20  
21 The APEX study was approved by Southampton and South West Hampshire Research Ethics  
22  
23 Committee (09/H0504/94).  
24  
25  
26  
27  
28  
29  
30  
31  
32  
33  
34  
35  
36  
37  
38  
39  
40  
41  
42  
43  
44  
45  
46  
47  
48  
49  
50  
51  
52  
53  
54  
55  
56  
57  
58  
59  
60



## RESULTS

In all subdivisions of the ICOAP questionnaire, for THR/TKR patients, the estimates of the baseline mean and change scores are approximately equal to those from the MLM approaches. In addition, estimates of the SD of baseline and change score are overestimated using existing approaches in THR/TKR patients. The SD of baseline measurements of pain were approximately 3.3 and 3.75 points greater in existing methods compared to MLM methods in THR/TKR patients respectively, while the corresponding SD of change scores are approximately 6.3 and 7 points greater in existing methods, see table 1 and 2 respectively. An example of model diagnostics is included in Figure 2, which presents the observed ICOAP total scores at 0, 3, 6, and 12 months and the population average response in ICOAP across time. In addition, baseline, change residuals are also presented using quantile-quantile plots.

1  
2  
3  
4  
5  
6  
7  
8  
9  
10  
11  
12  
13  
14  
15  
16  
17  
18  
19  
20  
21  
22  
23  
24  
25  
26  
27  
28  
29  
30  
31  
32  
33  
34  
35  
36  
37  
38  
39  
40  
41  
42  
43  
44  
45  
46  
47  
48  
49

Table 1: Mean and standard deviation of baseline and change scores estimated using current and multi-level model approaches to responsiveness in a patient undergoing total hip replacement in the APEX cohort study. Betas represent the population average characteristic and sigma the estimated standard deviation. Baseline is assumed to be the day of surgery, and change is from 0 to 3 months.

|                    | N   | Current Approaches to Responsiveness |                                   |                       |                   | Multi-Level Model Approaches to Responsiveness |                                   |                       |                   |
|--------------------|-----|--------------------------------------|-----------------------------------|-----------------------|-------------------|------------------------------------------------|-----------------------------------|-----------------------|-------------------|
|                    |     | Baseline<br>$\beta_0$ $\sigma_{u0}$  | Change<br>$\beta_1$ $\sigma_{u1}$ | Absolute<br>Threshold | P(Resp.)          | Baseline<br>$\beta_0$ $\sigma_{u0}$            | Change<br>$\beta_1$ $\sigma_{u1}$ | Absolute<br>Threshold | P(Resp.)          |
| Return to Normal   | 210 | 43.71 (22.1)                         | 45.76 (24.0)                      | 87.9                  | 70.5 (63.8, 76.6) | 43.71 (20.1)                                   | 46.14 (19.7)                      | 83.8                  | 78.1 (71.9, 83.5) |
| MID                | 210 |                                      |                                   | 11.0                  | 91.9 (87.4, 95.2) |                                                |                                   | 10.0                  | 97.6 (94.5, 99.2) |
| MCID (Satisfied)   | 185 | 44.37 (22.0)                         | 48.43 (22.6)                      | 32.6                  | 71.9 (65.3, 77.9) | 44.37 (20.3)                                   | 48.54 (19.2)                      | 35.8                  | 67.1 (74.5, 85.6) |
| MCID (UnSatisfied) | 25  | 38.77 (22.4)                         | 26.05 (25.4)                      |                       |                   | 38.77 (17.0)                                   | 28.43 (16.3)                      |                       |                   |
| Return to Normal   | 210 | 49.19 (27.2)                         | 44.23 (27.3)                      | 103.5                 | 0 (0, 1.7)        | 49.19 (25.6)                                   | 44.35 (24.0)                      | 100.3                 | 0 (0, 1.7)        |
| MID                | 210 |                                      |                                   | 13.6                  | 84.3 (78.6, 88.9) |                                                |                                   | 12.8                  | 88.6 (83.5, 92.5) |
| MCID (Satisfied)   | 185 | 50.08 (27.4)                         | 46.37 (26.7)                      | 30.0                  | 72.4 (65.8, 78.3) | 50.08 (26.3)                                   | 46.21 (24.5)                      | 31.0                  | 73.3 (44.2, 58.9) |
| MCID (UnSatisfied) | 25  | 42.60 (24.8)                         | 28.40 (26.9)                      |                       |                   | 42.60 (18.3)                                   | 30.60 (12.6)                      |                       |                   |
| OO                 | 210 | 49.19 (27.2)                         | 44.23 (27.3)                      | 20(10)                | 92.4 (87.9, 95.6) | 49.19 (25.3)                                   | 44.35 (23.4)                      | 20(10)                | 99.5 (54.8, 69)   |
| Return to Normal   | 210 | 39.13 (21.7)                         | 47.06 (26.5)                      | 82.5                  | 70 (63.3, 76.1)   | 39.13 (18.7)                                   | 47.66 (20.5)                      | 76.5                  | 80.5 (90.5, 97.4) |
| MID                | 210 |                                      |                                   | 10.8                  | 90 (85.1, 93.7)   |                                                |                                   | 9.3                   | 97.1 (30, 44.1)   |
| MCID (Satisfied)   | 185 | 39.60 (21.7)                         | 50.17 (24.9)                      | 37.5                  | 71.4 (64.8, 77.4) | 39.60 (19.2)                                   | 50.50 (19.1)                      | 40.5                  | 67.1 (84.8, 93.9) |
| MCID (UnSatisfied) | 25  | 35.58 (21.4)                         | 24.08 (26.6)                      |                       |                   | 35.58 (13.9)                                   | 26.69 (17.1)                      |                       |                   |
| OO                 | 210 | 39.13 (21.7)                         | 47.06 (26.5)                      | 20(10)                | 92.4 (87.9, 95.6) | 39.13 (18.5)                                   | 47.66 (19.1)                      | 20(10)                | 99.5 (60.3, 73.5) |

MID = Minimally Important Difference, MCID = Minimally Clinically Important Difference, OO= OMERACT OARSI responder criteria. P(Resp.) = Proportion of Responders.

Table 2: Mean and standard deviation of baseline and change scores estimated using current and multi-level model approaches to responsiveness in patient undergoing total knee replacement in the APEX cohort study. Betas represent the population average characteristic and sigma the estimated standard deviation. Baseline is assumed to be the day of surgery, and change is from 0 to 3 months.

|                   | N                  | Current Approaches to Responsiveness |                                   |                       |          | Multi-Level Model Approaches to Responsiveness |                                   |                       |          |                   |
|-------------------|--------------------|--------------------------------------|-----------------------------------|-----------------------|----------|------------------------------------------------|-----------------------------------|-----------------------|----------|-------------------|
|                   |                    | Baseline<br>$\beta_0$ $\sigma_{u0}$  | Change<br>$\beta_1$ $\sigma_{u1}$ | Absolute<br>Threshold | P(Resp.) | Baseline<br>$\beta_0$ $\sigma_{u0}$            | Change<br>$\beta_1$ $\sigma_{u1}$ | Absolute<br>Threshold | P(Resp.) |                   |
| Total Pain        | Return to Normal   | 190                                  | 42.86 (19.7)                      | 31.27 (23.2)          | 82.3     | 43.2 (36, 50.5)                                | 42.89 (16.7)                      | 32.09 (17.7)          | 76.3     | 51.6 (60.3, 73.5) |
|                   | MID                | 190                                  |                                   |                       | 9.9      | 79.5 (73, 85)                                  |                                   |                       | 8.3      | 93.2 (60.3, 73.5) |
|                   | MCID (Satisfied)   | 138                                  | 44.09 (19.7)                      | 38.51 (20.6)          | 22.7     | 62.6 (55.3, 69.5)                              | 44.13 (16.7)                      | 38.76 (14.7)          | 29.9     | 55.3 (66.8, 79.2) |
|                   | MCID (UnSatisfied) | 52                                   | 39.62 (19.7)                      | 12.04 (18.0)          |          |                                                | 39.62 (16.3)                      | 14.28 (11.5)          |          |                   |
| Chronic Pain      | Return to Normal   | 190                                  | 47.76 (23.6)                      | 31.61 (25.5)          | 94.9     | 44.7 (37.5, 52.1)                              | 47.79 (20.5)                      | 32.46 (19.5)          | 88.7     | 36.8 (47.9, 62.5) |
|                   | MID                | 190                                  |                                   |                       | 11.8     | 74.7 (67.9, 80.7)                              |                                   |                       | 10.2     | 90 (47.9, 62.5)   |
|                   | MCID (Satisfied)   | 138                                  | 48.80 (23.4)                      | 38.59 (23.3)          | 23.7     | 64.2 (57, 71)                                  | 48.88 (20.5)                      | 38.88 (17.7)          | 30.3     | 55.3 (47.4, 62)   |
|                   | MCID (UnSatisfied) | 52                                   | 45.00 (24.1)                      | 13.08 (21.9)          |          |                                                | 45.00 (20.1)                      | 15.26 (13.3)          |          |                   |
|                   | OO                 | 190                                  | 47.76 (23.6)                      | 31.61 (25.5)          | 20(10)   | 81.0 (74.7, 86.3)                              | 47.78 (20.2)                      | 32.50 (18.9)          | 20(10)   | 98.4 (47.9, 62.5) |
| Intermittent Pain | Return to Normal   | 190                                  | 38.78 (18.2)                      | 30.97 (23.9)          | 75.3     | 40.5 (33.5, 47.9)                              | 38.80 (13.8)                      | 31.77 (16.7)          | 66.4     | 62.1 (47.9, 62.5) |
|                   | MID                | 190                                  |                                   |                       | 9.1      | 78.9 (72.5, 84.5)                              |                                   |                       | 6.9      | 94.7 (97.4, 100)  |
|                   | MCID (Satisfied)   | 138                                  | 40.15 (18.3)                      | 38.45 (21.2)          | 24.8     | 61.6 (54.3, 68.5)                              | 40.20 (14.1)                      | 38.63 (12.8)          | 31.2     | 54.7 (97.4, 100)  |
|                   | MCID (UnSatisfied) | 52                                   | 35.14 (17.8)                      | 11.12 (19.0)          |          |                                                | 35.14 (12.8)                      | 13.40 (10.8)          |          |                   |
|                   | OO                 | 190                                  | 38.78 (18.2)                      | 30.97 (23.9)          | 20(10)   | 81.0 (74.7, 86.3)                              | 38.81 (13.6)                      | 31.74 (15.7)          | 20(10)   | 98.4 (95.5, 99.7) |

MID = Minimally Important Difference, MCID = Minimally Clinically Important Difference, OO= OMERACT OARSI responder criteria. P(Resp.) = Proportion of Responders.

### Return To Normal

Using similar baseline score estimates to the conventional RTN approach and different SD's results in a reduction in the threshold of response by approximately 5 points in THR/TKR patients. The change in threshold is due to smaller estimates of baseline and change SD's. When considering the total ICOAP score, the MLM approach classifies approximately 10% more individuals as responders than existing approaches. It is also interesting to note that the threshold of response using the existing approach when considering total ICOAP score in THR patients is beyond the range of the score.

### Minimally Important Difference

Using similar change score estimates and different SD's results in an approximately 2 point reduction in the MID threshold in THR/TKR patients. The reduced threshold results in more individuals being classified as responders using the MLM approach.

### Minimally Clinically Important Difference

Using the MLM approach in satisfied and unsatisfied individuals results in a small increase in the threshold of response in comparison to existing approaches. The increase in threshold is due to shrunken residuals and therefore reduced the variability of predicted change scores. The increase in threshold results in a reduced number of individuals (3% of THR patients and 6% of TKR patients) being identified as responders.

### OMERACT-OARSI

The OO approach uses fixed definitions of responsiveness. Individual estimates of change from the bivariate MLM for constant and intermittent pain are very similar to those from the univariate MLM. However, the standard deviation of the change score is reduced by approximately 0.5 and 1 points in constant and intermittent pain comparing the univariate and bivariate MLM respectively, whereas

1  
2  
3 the SD of baseline score approximately the same. Despite the larger absolute threshold of 20 and 10  
4  
5 points for changes in 1 or 2 items respectively, i.e. larger than MID, there is an increase in the  
6  
7 proportion of individuals identified as responding. The increase is partly due to the use of the  
8  
9 relative change threshold, and the reduced variability in change in comparison to the univariate  
10  
11 MLM using MID definition of responsiveness.  
12

### 13 14 15 Responsiveness Classification

16  
17 The effect of using a MLM approach to defining patient responsiveness compared to existing  
18  
19 approaches is presented in Tables 3 and 4 for THR and TKR patients respectively. Whilst the use of  
20  
21 MLM provides refined thresholds of responsiveness it fundamentally changes the way individuals  
22  
23 are classified due to adjustment for measurement error, regression to the mean and ability to  
24  
25 conduct refined tests. Patients previously defined as non-responding using existing methods are now  
26  
27 responders (Positive change) in MLM approaches, and similarly, patients defined as responders  
28  
29 using existing methods are classified as non-responders (negative change) in MLM, see Figure 3 for  
30  
31 graphical illustration. MLM MID and OO methods appear to be most consistent in the reclassification  
32  
33 of patients increasing the number of patients defined as non-responders using existing methods as  
34  
35 responders in MLM approaches. Whereas MLM RTN and MCII provide a more fundamental change  
36  
37 the classifications of patient responsiveness.  
38  
39  
40  
41  
42  
43  
44  
45  
46  
47  
48  
49  
50  
51  
52  
53  
54  
55  
56  
57  
58  
59  
60

Table 3: Cross-classification of responsiveness status in THR patients using existing and MLM model approaches to responsiveness: Return To Normal (RTN), Minimally Important Difference (MID), Minimally Clinical Important Improvement (MCII), and OMERACT OARSI (OO) Criteria.

| Total Hip Replacement<br>ICOAP |                           |        | Multilevel Model |            |           |            |           |            |          |            |
|--------------------------------|---------------------------|--------|------------------|------------|-----------|------------|-----------|------------|----------|------------|
|                                |                           |        | RTN              |            | MID       |            | MCII      |            | OO       |            |
|                                |                           |        | N.Resp           | Resp       | N.Resp    | Resp       | N.Resp    | Resp       | N.Resp   | Resp       |
| Total                          | N.Resp                    |        | <b>36</b>        | <b>26</b>  | <b>5</b>  | <b>12</b>  | <b>52</b> | <b>7</b>   | -        | -          |
|                                | Resp                      |        | <b>10</b>        | <b>138</b> | <b>0</b>  | <b>193</b> | <b>17</b> | <b>134</b> | -        | -          |
| Existing                       | Chronic                   | N.Resp | 210              | 0          | <b>24</b> | <b>9</b>   | 52        | 6          | -        | -          |
|                                |                           | Resp   | 0                | 0          | <b>0</b>  | <b>177</b> | 4         | 148        | -        | -          |
| Existing                       | Intermittent              | N.Resp | <b>33</b>        | <b>30</b>  | <b>6</b>  | <b>15</b>  | 50        | 10         | -        | -          |
|                                |                           | Resp   | <b>8</b>         | <b>139</b> | <b>0</b>  | <b>189</b> | 19        | 131        | -        | -          |
| Existing                       | Chronic &<br>Intermittent | N.Resp | -                | -          | -         | -          | -         | -          | <b>1</b> | <b>15</b>  |
|                                |                           | Resp   | -                | -          | -         | -          | -         | -          | <b>0</b> | <b>194</b> |

N.Resp= Non-Responders; Resp = Responders; Bold Cells indicate significance ( $p \leq 0.05$ ) of discordant pairs using Exact McNemar test.

Table 4: Cross-classification of responsiveness status in TKR patients using existing and MLM model approaches to responsiveness: Return To Normal (RTN), Minimally Important Difference (MID), Minimally Clinical Important Improvement (MCII), and OMERACT OARSI (OO) Criteria.

| Total Knee Replacement<br>ICOAP |                           |        | Multilevel Model |           |           |            |           |           |          |            |
|---------------------------------|---------------------------|--------|------------------|-----------|-----------|------------|-----------|-----------|----------|------------|
|                                 |                           |        | RTN              |           | MID       |            | MCII      |           | OO       |            |
|                                 |                           |        | N.Resp           | Resp      | N.Resp    | Resp       | N.Resp    | Resp      | N.Resp   | Resp       |
| Total                           | N.Resp                    |        | <b>81</b>        | <b>27</b> | <b>13</b> | <b>26</b>  | <b>64</b> | <b>7</b>  | -        | -          |
|                                 | Resp                      |        | <b>11</b>        | <b>71</b> | <b>0</b>  | <b>151</b> | <b>21</b> | <b>98</b> | -        | -          |
| Existing                        | Chronic                   | N.Resp | 92               | 13        | <b>19</b> | <b>29</b>  | 61        | 7         | -        | -          |
|                                 |                           | Resp   | 28               | 57        | <b>0</b>  | <b>142</b> | 24        | 98        | -        | -          |
| Existing                        | Intermittent              | N.Resp | <b>69</b>        | <b>44</b> | <b>9</b>  | <b>31</b>  | 63        | 10        | -        | -          |
|                                 |                           | Resp   | <b>3</b>         | <b>74</b> | <b>1</b>  | <b>149</b> | 23        | 94        | -        | -          |
| Existing                        | Chronic &<br>Intermittent | N.Resp | -                | -         | -         | -          | -         | -         | <b>3</b> | <b>33</b>  |
|                                 |                           | Resp   | -                | -         | -         | -          | -         | -         | <b>0</b> | <b>154</b> |

N.Resp= Non-Responders; Resp = Responders; Bold Cells indicate significance ( $p \leq 0.05$ ) of discordant pairs using Exact McNemar test.

## DISCUSSION

The primary purpose of a responsiveness analysis is to convey the variability of an individual's chances of perceiving an improvement following a treatment. Existing approaches appear to be distinct from one another, and the precise relationship between existing methods was unclear.

We have clearly shown how four commonly used approaches to estimating patient responsiveness can be incorporated into the unified statistical framework of MLM. Their translation into unified framework makes many of the assumption (linearity of response, heterogeneity in the timing of measures, multiple measurements) underpinning existing approaches clear. The application of patient responsiveness models in a cohort of orthopaedic patients illustrates how SD's of baseline and change scores in existing approaches are overestimated in comparison to the MLM approach. Thresholds for defining responders from MLM are lower when based on SD, and therefore existing approaches to RTN & MID may appear to provide a worse case scenario with regards the efficacy of a treatment or therapy. Similarly, responsiveness approaches based on the distribution of predicted change scores (MCII) are higher in MLM, and therefore existing thresholds could be described as a best case scenario in comparison to existing approaches. However, the reclassification of patients using the MLM is more fundamental than increasing or reducing the threshold to determine responsiveness, the implicit adjustments for measurement error and regression to the mean change which patients are defined as responding or not.

MLM are not the panacea of patient responsiveness methods, however, they do highlight implicit assumptions in existing approaches and provide sensible adjustments for measurement error, regression to the mean and heterogeneity in the timing of measurements in clinical studies.

From a clinical perspective, it is very clear there are differences in the outcomes at 3 months following THR and TKR. Whilst patient's baseline level of pain, are similar between THR and TKR, the response to surgery is less, and consistently less (lower variability) for all pain domains. Similarly, we

1  
2  
3 have previously observed different patterns of pain, in relation to pain at rest and pain on  
4  
5 movement,<sup>60</sup> yet the mechanisms underpinning these effects are unclear and require more  
6  
7 research, but this does emphasize the necessity to treat hip and knee osteoarthritis as separate  
8  
9 disease states.

#### 10 11 12 Strengths & Limitations

13  
14  
15 One of the key benefits of adopting a MLM approach when defining clinically meaningful change is  
16  
17 the improved estimation of individual change by the greater flexibility in the MLM framework.  
18  
19 Specifically, MLM do not assume the response is measured without error, they adjust for regression  
20  
21 to the mean, the trajectory of recovery is not constrained to be linear, and data from multiple  
22  
23 measurements and variability in the timing of those measurement occasions can also be  
24  
25 incorporated into the model. Furthermore, assuming the underlying MLM adequately represents the  
26  
27 true causal mechanism, parameter estimates, SD's and standard errors will be unbiased in  
28  
29 comparison to existing approaches.  
30  
31

32  
33  
34 Furthermore, the unification of existing approaches into a MLM framework clearly shows the  
35  
36 relationship between the four different approaches. For example, RTN and MID share the same  
37  
38 underlying model. MCII is also the same at RTN/MID if you assume the baseline and change scores  
39  
40 are the same across strata of un/satisfied patients. Similarly, the model underlying OO approach is  
41  
42 the same as the RTN/MID approach if you assume independence in the measured outcomes of the  
43  
44 two trajectories, and the error term.  
45

46  
47  
48 Despite the numerous benefits of adopting a MLM approach, it is not to say it is without some  
49  
50 limitations. MLM are technically more demanding than existing formulations of patient  
51  
52 responsiveness, and whilst there are no theoretical limits on how large or small samples have to be,  
53  
54 model convergence is not guaranteed. The need to use appropriate estimation methods<sup>38</sup> or  
55  
56 denominator degrees of freedom<sup>55</sup> when calculating standard errors also requires consideration.  
57  
58  
59  
60



1  
2  
3 Furthermore, it is important to perform model diagnostic to check the data fit with the model. MLM  
4  
5 does not improve the arbitrary placement of the thresholds that define responsiveness in  
6  
7 comparison to existing methods, and despite the improved trajectory modelling, it is currently  
8  
9 unclear if the refined definitions correlate more strongly with patient expectations, functional data,  
10  
11 long-term self-reported outcomes, or hard end-points such as mortality and revision. Further  
12  
13 research externally validating the classification using patient groups, expert opinion<sup>61</sup> or functional  
14  
15 data may demonstrate improved classification of those responding to treatment in comparison to  
16  
17 existing methods. In addition, the use of multiple measurements in MLM primarily restricts the  
18  
19 method to a research setting.  
20  
21

22  
23 It is clear the MLMs provide considerable advantages over existing approaches to identifying  
24  
25 patients who respond to a treatment. Consequently, the proportion of individuals thought not to be  
26  
27 responding to treatment may be smaller than previously thought. Using the redefined definition may  
28  
29 reduce the number of individuals misclassified as non-responders, and improve the prediction of  
30  
31 those individuals who are likely to respond to treatment.  
32  
33  
34  
35  
36  
37  
38  
39  
40  
41  
42  
43  
44  
45  
46  
47  
48  
49  
50  
51  
52  
53  
54  
55  
56  
57  
58  
59  
60

## Figures

Figure 1: Illustration of a “double” long data setup for creating a bivariate MLM.

Figure 2: Modelling diagnostic plots. Upper left, ladder plot of observed ICOAP total scores at 0, 3, 6, and 12 months following THR, and population average trajectory estimated from a MLM, used in RTN and MID analysis, with 2 linear splines with a knot at 3 months. Upper right, lower left and right plots are quantile-quantile plots of the residual distribution of random effects estimated from a MLM with 2 linear splines with a knot at 3 months.

Figure 3: Change in Responder classification using a RTN definition comparing existing approaches to MLM approach using the ICOAP total score in patients following THR. Upper Left panel illustrates observed trajectories for patients whose responsiveness classification changes using a MLM approach to estimating responsiveness. Lower left panel illustrates the observed and predicted trajectories of ICOAP total score in patients positively reclassified as responders compared to existing approaches. Lower right panel illustrates the observed and predicted trajectories of ICOAP total score in patients negatively reclassified as non-responders compared to existing approaches.

## Abbreviations

APEX – Arthroplasty Pain Experience

ICOAP - Intermittent and Constant Osteoarthritis Pain

MCI – Minimally Clinical Important Improvement

MID – Minimal Important Difference

MLM – Multi Level Model

OO – OMERACT OARSI Criteria

RCI – Relative Change Index

RTN – Return To Normal

SD – Standard Deviation

SE – Standard Error

THR – Total Hip Replacement

1  
2  
3 TKR – Total Knee Replacement  
4

5  
6 **Acknowledgements**  
7

8 We would like to thank Professor Fiona Steele for her extensive comments and help preparing  
9  
10 this manuscript.  
11

12  
13 **Author Contributions**  
14

15  
16 Study Conception (AS). APEX study design (VW, RGH, AWB). APEX acquisition of data (VW, RGH,  
17 AWB, EL). ACHE study design (JD, DB, AP). Wrote first draft & revised manuscript (AS). Drafting and  
18 review of the manuscript (AS, VW, RGH, AWB, EL, JD, DB, AP). Final approval of Manuscript (AS, VW,  
19 RGH, AWB, EL, JD, DB, AP)  
20  
21

22  
23 **Funding Statement**  
24

25  
26 This work was supported by AS is funded by an MRC Fellowship MR/L01226X/1 and HTA  
27 Project:11/63/01 – ‘ACHE’. This article presents independent research funded by the National  
28 Institute for Health Research (NIHR) under its Programme Grants for Applied Research programme  
29 (RP-PG-0407-10070). The views expressed in this article are those of the authors and not necessarily  
30 those of the NHS, the NIHR or the Department of Health. The research team acknowledges the  
31 support of the NIHR, through the Comprehensive Clinical Research Network.  
32  
33

34  
35 **Competing Interest**  
36

37  
38 The Authors have no competing interests to declare.  
39

40  
41 **Data Sharing**  
42

43  
44 No data is available to be shared.  
45  
46  
47  
48  
49  
50  
51  
52  
53  
54  
55  
56  
57  
58  
59  
60

## REFERENCES

1. Felson DT, Naimark A, Anderson J, et al. The prevalence of knee osteoarthritis in the elderly. The Framingham Osteoarthritis Study. *Arthritis and rheumatism* 1987;30(8):914-8. [published Online First: 1987/08/01]
2. Lawrence RC, Felson DT, Helmick CG, et al. Estimates of the prevalence of arthritis and other rheumatic conditions in the United States. Part II. *Arthritis and rheumatism* 2008;58(1):26-35. doi: 10.1002/art.23176
3. National Joint Registry. 10th Annual Report 2013. Hemel Hempstead 2013.
4. Beswick AD, Wylde V, Gooberman-Hill R, et al. What proportion of patients report long-term pain after total hip or knee replacement for osteoarthritis? A systematic review of prospective studies in unselected patients. *Bmj Open* 2012;2(1) doi: ARTN e000435  
DOI 10.1136/bmjopen-2011-000435
5. Jeffery AE, Wylde V, Blom AW, et al. "It's there and I'm stuck with it": patients' experiences of chronic pain following total knee replacement surgery. *Arthritis care & research* 2011;63(2):286-92. doi: 10.1002/acr.20360
6. Kassam A, Dieppe P, Toms AD. An analysis of time and money spent on investigating painful Total Knee Replacements. *British Journal of Medical Practitioners* 2012;5(3)
7. Bellamy N, Buchanan WW, Goldsmith CH, et al. Validation study of WOMAC: a health status instrument for measuring clinically important patient relevant outcomes to antirheumatic drug therapy in patients with osteoarthritis of the hip or knee. *The Journal of rheumatology* 1988;15(12):1833-40.
8. Klassbo M, Larsson E, Mannevik E. Hip disability and osteoarthritis outcome score. An extension of the Western Ontario and McMaster Universities Osteoarthritis Index. *Scandinavian journal of rheumatology* 2003;32(1):46-51.
9. Roos EM, Roos HP, Lohmander LS, et al. Knee Injury and Osteoarthritis Outcome Score (KOOS)--development of a self-administered outcome measure. *The Journal of orthopaedic and sports physical therapy* 1998;28(2):88-96. doi: 10.2519/jospt.1998.28.2.88
10. Dawson J, Fitzpatrick R, Carr A, et al. Questionnaire on the perceptions of patients about total hip replacement. *J Bone Joint Surg Br* 1996;78B(2):185-90.
11. Dawson J, Fitzpatrick R, Murray D, et al. Questionnaire on the perceptions of patients about total knee replacement. *J Bone Joint Surg Br* 1998;80B(1):63-69. doi: Doi 10.1302/0301-620x.80b1.7859
12. Focht BC, Rejeski WJ, Ambrosius WT, et al. Exercise, self-efficacy, and mobility performance in overweight and obese older adults with knee osteoarthritis. *Arthritis and rheumatism* 2005;53(5):659-65. doi: 10.1002/art.21466
13. Smith AJ, Dieppe P, Howard PW, et al. Failure rates of metal-on-metal hip resurfacings: analysis of data from the National Joint Registry for England and Wales. *Lancet* 2012;380(9855):1759-66. doi: 10.1016/s0140-6736(12)60989-1
14. Smith AJ, Dieppe P, Porter M, et al. Risk of cancer in first seven years after metal-on-metal hip replacement compared with other bearings and general population: linkage study between the National Joint Registry of England and Wales and hospital episode statistics. *Bmj* 2012;344:e2383. doi: 10.1136/bmj.e2383
15. Hunt LP, Ben-Shlomo Y, Clark EM, et al. 45-day mortality after 467 779 knee replacements for osteoarthritis from the National Joint Registry for England and Wales: an observational study. *Lancet* 2014 doi: 10.1016/s0140-6736(14)60540-7

16. Hunt LP, Ben-Shlomo Y, Clark EM, et al. 90-day mortality after 409,096 total hip replacements for osteoarthritis, from the National Joint Registry for England and Wales: a retrospective analysis. *Lancet* 2013;382(9898):1097-104. doi: 10.1016/s0140-6736(13)61749-3
17. Riddle DL, Stratford PW, Bowman DH. Findings of extensive variation in the types of outcome measures used in hip and knee replacement clinical trials: A systematic review. *Arthrit Rheum-Arthr* 2008;59(6):876-83. doi: Doi 10.1002/Art.23706
18. Wylde V, Bruce J, Beswick A, et al. Assessment of chronic postsurgical pain after knee replacement: a systematic review. *Arthritis care & research* 2013;65(11):1795-803. doi: 10.1002/acr.22050
19. Wylde V, Blom AW. The failure of survivorship. *The Journal of bone and joint surgery British volume* 2011;93(5):569-70. doi: 10.1302/0301-620X.93B5.26687 [published Online First: 2011/04/23]
20. Darzi. High quality care for all: NHS Next Stage Review final report, 2008.
21. Hawker GA, Davis AM, French MR, et al. Development and preliminary psychometric testing of a new OA pain measure--an OARSI/OMERACT initiative. *Osteoarthritis and cartilage / OARS, Osteoarthritis Research Society* 2008;16(4):409-14. doi: 10.1016/j.joca.2007.12.015
22. Zigmond AS, Snaith RP. The hospital anxiety and depression scale. *Acta Psychiatr Scand* 1983;67(6):361-70.
23. Williams A, Kind P. The present state of play about QALYs. In: Hopkins A, ed. Measure of the quality of life: the uses to which they may be put: RCP publications 1992.
24. Christensen L, Mendoza JL. A Method of Assessing Change in a Single Subject - an Alteration of the Rc Index. *Behav Ther* 1986;17(3):305-08. doi: Doi 10.1016/S0005-7894(86)80060-0
25. Guyatt GH, Osoba D, Wu AW, et al. Methods to explain the clinical significance of health status measures. *Mayo Clinic proceedings* 2002;77(4):371-83. doi: 10.1016/S0025-6196(11)61793-X
26. Jacobson NS, Roberts LJ, Berns SB, et al. Methods for defining and determining the clinical significance of treatment effects: description, application, and alternatives. *Journal of consulting and clinical psychology* 1999;67(3):300-7.
27. Jacobson NS, Truax P. Clinical significance: a statistical approach to defining meaningful change in psychotherapy research. *Journal of consulting and clinical psychology* 1991;59(1):12-9.
28. Kvien TK, Heiberg T, Hagen KB. Minimal clinically important improvement/difference (MCI/ MCID) and patient acceptable symptom state (PASS): what do these concepts mean? *Annals of the rheumatic diseases* 2007;66 Suppl 3:iii40-1. doi: 10.1136/ard.2007.079798
29. Maksymowych WP, Richardson R, Mallon C, et al. Evaluation and validation of the patient acceptable symptom state (PASS) in patients with ankylosing spondylitis. *Arthritis and rheumatism* 2007;57(1):133-9. doi: 10.1002/art.22469
30. Norman GR, Sloan JA, Wyrwich KW. Interpretation of changes in health-related quality of life: the remarkable universality of half a standard deviation. *Medical care* 2003;41(5):582-92. doi: 10.1097/01.MLR.0000062554.74615.4C
31. Norman GR, Sridhar FG, Guyatt GH, et al. Relation of distribution- and anchor-based approaches in interpretation of changes in health-related quality of life. *Medical care* 2001;39(10):1039-47.
32. Pham T, van der Heijde D, Altman RD, et al. OMERACT-OARSI initiative: Osteoarthritis Research Society International set of responder criteria for osteoarthritis clinical trials revisited. *Osteoarthritis and cartilage / OARS, Osteoarthritis Research Society* 2004;12(5):389-99. doi: 10.1016/j.joca.2004.02.001
33. Revicki D, Hays RD, Cella D, et al. Recommended methods for determining responsiveness and minimally important differences for patient-reported outcomes. *Journal of clinical epidemiology* 2008;61(2):102-9. doi: 10.1016/j.jclinepi.2007.03.012
34. Tubach F, Ravaud P, Baron G, et al. Evaluation of clinically relevant changes in patient reported outcomes in knee and hip osteoarthritis: the minimal clinically important improvement. *Annals of the rheumatic diseases* 2005;64(1):29-33. doi: 10.1136/ard.2004.022905

- 1
- 2
- 3 35. Tubach F, Ravaud P, Baron G, et al. Evaluation of clinically relevant states in patient reported
- 4 outcomes in knee and hip osteoarthritis: the patient acceptable symptom state. *Annals of*
- 5 *the rheumatic diseases* 2005;64(1):34-7. doi: 10.1136/ard.2004.023028
- 6
- 7 36. Judge A, Cooper C, Williams S, et al. Patient-reported outcomes one year after primary hip
- 8 replacement in a European Collaborative Cohort. *Arthritis care & research* 2010;62(4):480-8.
- 9 doi: 10.1002/acr.20038
- 10
- 11 37. Goldstein H. Multilevel Statistical Models 2002.
- 12
- 13 38. Browne WJ, Draper D. Implementation and performance issues in the Bayesian and likelihood
- 14 fitting of multilevel models. *Computation Stat* 2000;15(3):391-420. doi: DOI
- 15 10.1007/s001800000041
- 16
- 17 39. King MT. A point of minimal important difference (MID): a critique of terminology and methods.
- 18 *Expert Rev Pharmacoecon Outcomes Res* 2011;11(2):171-84. doi: 10.1586/erp.11.9
- 19
- 20 40. Schuck P, Zwingmann C. The 'smallest real difference' as a measure of sensitivity to change: a
- 21 critical analysis. *Int J Rehabil Res* 2003;26(2):85-91. doi:
- 22 10.1097/01.mrr.0000070759.63544.65
- 23
- 24 41. Wylde V, Gooberman-Hill R, Horwood J, et al. The effect of local anaesthetic wound infiltration
- 25 on chronic pain after lower limb joint replacement: a protocol for a double-blind randomised
- 26 controlled trial. *BMC musculoskeletal disorders* 2011;12:53. doi: 10.1186/1471-2474-12-53
- 27
- 28 42. Altman DG, Gore SM, Gardner MJ, et al. Statistical guidelines for contributors to medical
- 29 journals. *British medical journal* 1983;286(6376):1489-93.
- 30
- 31 43. Sterne JA, Davey Smith G. Sifting the evidence-what's wrong with significance tests? *Bmj*
- 32 2001;322(7280):226-31.
- 33
- 34 44. McConnell S, Kolopack P, Davis AM. The Western Ontario and McMaster Universities
- 35 Osteoarthritis Index (WOMAC): A review of its utility and measurement properties. *Arthrit*
- 36 *Rheum-Arthr* 2001;45(5):453-61. doi: Doi 10.1002/1529-0131(200110)45:5<453::Aid-
- 37 Art365>3.0.Co;2-W
- 38
- 39 45. Twisk J, Rijmen F. Longitudinal tobit regression: A new approach to analyze outcome variables
- 40 with floor or ceiling effects. *Journal of clinical epidemiology* 2009;62(9):953-58. doi: DOI
- 41 10.1016/j.jclinepi.2008.10.003
- 42
- 43 46. Ram N, Grimm KJ. Growth mixture modeling: A method for identifying differences in longitudinal
- 44 change among unobserved groups. *Int J Behav Dev* 2009;33(6):565-76. doi: Doi
- 45 10.1177/0165025409343765
- 46
- 47 47. Jones G, Lyons P. Approximate graphical methods for inverse regression. *Journal of Data Science*
- 48 2009;7:61-72.
- 49
- 50 48. Snijders TAB, Bosker RJ. Multilevel Analysis: An Introduction to Basic and Advanced Multilevel
- 51 Modeling, second edition. London: Sage Publishers 2012.
- 52
- 53 49. Fieuws S, Verbeke G. Pairwise fitting of mixed models for the joint modeling of multivariate
- 54 longitudinal profiles. *Biometrics* 2006;62(2):424-31. doi: 10.1111/j.1541-0420.2006.00507.x
- 55
- 56 50. Fieuws S, Verbeke G. Joint modelling of multivariate longitudinal profiles: pitfalls of the random-
- 57 effects approach. *Statistics in medicine* 2004;23(20):3093-104. doi: 10.1002/sim.1885
- 58
- 59 51. Verbeke G, Molenberghs G. Linear mixed models for longitudinal data. USA: Springer 2000.
- 60
- 52 52. Rasbash J, Steele F, Browne WJ, et al. A user's guide to MLWIN. UK 2009.
- 53
- 54 53. Copas JB. Regression, Prediction and Shrinkage. *J R Stat Soc B* 1983;45(3):311-54.
- 55
- 56 54. Fitzmaurice GM, Laird NM, Ware JH. Applied Longitudinal Analysis. USA: Wiley 2004.
- 57
- 58 55. Kenward MG, Roger JH. Small sample inference for fixed effects from restricted maximum
- 59 likelihood. *Biometrics* 1997;53(3):983-97.
- 60
- 56 56. Pan HQ, Goldstein H. Multi-level repeated measures growth modelling using extended spline
- 57 functions. *Statistics in medicine* 1998;17(23):2755-70. doi: Doi 10.1002/(Sici)1097-
- 58 0258(19981215)17:23<2755::Aid-Sim41>3.0.Co;2-E

- 1  
2  
3 57. Rabe-Hesketh S, Skrondal A. Multilevel and latent variable modeling with composite links and  
4 exploded likelihoods. *Psychometrika* 2007;72(2):123-40. doi: DOI 10.1007/s11336-006-1453-  
5 8  
6 58. Nagin DS, Odgers CL. Group-Based Trajectory Modeling in Clinical Research. *Annu Rev Clin Psycho*  
7 2010;6:109-38. doi: DOI 10.1146/annurev.clinpsy.121208.131413  
8 59. Lenguerrand E, Wylde V, Gooberman-Hill R, et al. Trajectories of Pain and Function after Primary  
9 Hip and Knee Arthroplasty: The ADAPT Cohort Study. *PLoS One* 2016;11(2):e0149306. doi:  
10 10.1371/journal.pone.0149306  
11 60. Sayers A, Wylde V, Lenguerrand E, et al. Rest Pain and Movement-Evoked Pain as Unique  
12 Constructs in Hip and Knee Replacements. *Arthritis care & research* 2016;68(2):237-45. doi:  
13 10.1002/acr.22656  
14 61. Bellamy N, Carette S, Ford PM, et al. Osteoarthritis antirheumatic drug trials. III. Setting the delta  
15 for clinical trials--results of a consensus development (Delphi) exercise. *The Journal of*  
16 *rheumatology* 1992;19(3):451-7.  
17  
18  
19  
20  
21  
22  
23  
24  
25  
26  
27  
28  
29  
30  
31  
32  
33  
34  
35  
36  
37  
38  
39  
40  
41  
42  
43  
44  
45  
46  
47  
48  
49  
50  
51  
52  
53  
54  
55  
56  
57  
58  
59  
60

1  
2  
3  
4  
5  
6  
7  
8  
9  
10  
11  
12  
13  
14  
15  
16  
17  
18  
19  
20  
21  
22  
23  
24  
25  
26  
27  
28  
29  
30  
31  
32  
33  
34  
35  
36  
37  
38  
39  
40  
41  
42  
43  
44  
45  
46  
47  
48  
49  
50  
51  
52  
53  
54  
55  
56  
57  
58  
59  
60



296x419mm (300 x 300 DPI)



1  
2  
3  
4  
5  
6  
7  
8  
9  
10  
11  
12  
13  
14  
15  
16  
17  
18  
19  
20  
21  
22  
23  
24  
25  
26  
27  
28  
29  
30  
31  
32  
33  
34  
35  
36  
37  
38  
39  
40  
41  
42  
43  
44  
45  
46  
47  
48  
49  
50  
51  
52  
53  
54  
55  
56  
57  
58  
59  
60



101x73mm (300 x 300 DPI)

Review only

1  
2  
3  
4  
5  
6  
7  
8  
9  
10  
11  
12  
13  
14  
15  
16  
17  
18  
19  
20  
21  
22  
23  
24  
25  
26  
27  
28  
29  
30  
31  
32  
33  
34  
35  
36  
37  
38  
39  
40  
41  
42  
43  
44  
45  
46  
47  
48  
49  
50  
51  
52  
53  
54  
55  
56  
57  
58  
59  
60

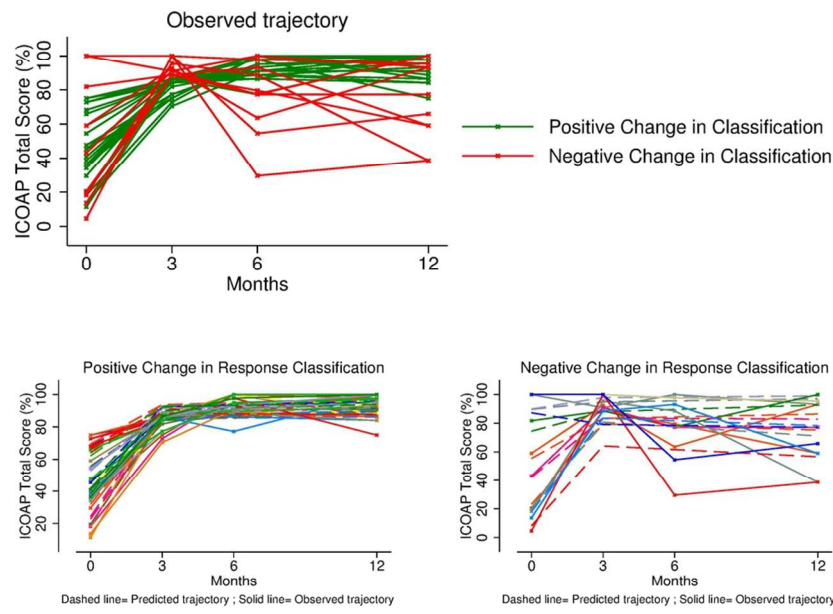

101x73mm (300 x 300 DPI)

Review only

```

1
2
3 *****
4 * A unified multi-level model approach to assessing patient responsiveness
5 * including; return to normal, minimally important differences, and minimally
6 * clinical important differences for patient reported outcome measures.
7 *****
8 *
9 * Sayers A*, Wylde V, Lenguerrand E, Gooberman-Hill R, Dawson J, Beard D,
10 * Price A, Blom AW
11 *
12 * 1. Musculoskeletal Research Unit, School of Clinical Sciences,
13 * University of Bristol, Southmead Hospital, Westbury On Trym,
14 * Bristol, BS10 5NB.
15 * 2. Nuffield Department of Population Health, University of Oxford,
16 * Old Road Campus, Headington, Oxford OX3 7LF, UK
17 * 3. Biomedical Research Unit, Nuffield Department of Orthopaedics,
18 * Rheumatology and Musculoskeletal Science, Nuffield Orthopaedic Centre,
19 * Windmill Road, Oxford, OX2 9JA
20 *
21 * Address for Correspondence
22 * Adrian Sayers, Musculoskeletal Research Unit, School of Clinical Sciences,
23 * University of Bristol, Learning and Research Building (Level 1),
24 * Southmead Hospital, Westbury on Trym, Bristol, BS10 5NB
25 *
26 * E-mail: adrian.sayers@bristol.ac.uk
27 * Tel: 44 (0)117 4147880; Fax + 44(0)117 414 7924
28 *****
29 * Abstract
30 * Stata code to illustrate calculation of patient responsiveness using existing
31 * and multi-level model methods.
32 * Do file should be run completely in order to simulate data from a linear model
33 * and perform calculations.
34 * File requires MLWin and copy of runmlwin downloaded for Stata.
35 *****
36 * 1. Simulate a dataset
37 *****
38 {
39 * Design matrix in OO Format
40 set seed 111
41 clear
42 set obs 100
43 gen id= _n
44
45 * Set Parameters values
46 * Set Fixed Effect Parameters
47 local b0 = 49.19
48 local b1 = 44.35 / 3
49 local b2 = 39.12

```

```

1
2
3           local b3 = 47.66 / 3
4 * Set Random Effect Standard Deviations & Correlation Matrix
5 local u0 = 25.3
6     local u1 = 23.4 / 3
7     local u2 = 18.5
8     local u3 = 19.1 / 3
9     matrix u = (`u0', `u1', `u2', `u3')'
10    matrix u_corr = (1      ,0.3 ,0.1 ,0.1 \ ///
11                    0.3 ,1      ,0.1 ,0.1 \ ///
12                    0.1 ,0.1 ,1      ,0.3 \ ///
13                    0.1 ,0.1 ,0.3 ,1      )
14
15 * Draw Random Parameters
16 drawnorm u0 u1 u2 u3 , sds(u) corr(u_corr)
17
18 * Create 4 measurement occasions
19 expand 4
20 by id , sort : gen t = _n-1
21
22 * Prepare for a reshape into double long
23 gen _1= 1
24     gen _2= 1
25     reshape long _ , i(id t) j(resp)
26     drop _
27
28 * Set error Standard Deviations & Correlation Matrix
29 local e1= 5
30     local e2= 5
31     matrix e = (`e1', `e2')'
32     matrix e_corr = (1      ,0.1 \ ///
33                    0.1 ,1      ) //
34
35     drawnorm e1 e2 , sds(e) corr(e_corr)
36
37 * Create response indicators for OO
38 gen w1 = 1 if resp==1
39     replace w1 = 0 if resp==2
40     gen w2 = 0 if resp==1
41     replace w2 = 1 if resp==2
42
43 * Generate a satisfaction indicator, uncorrelated with effects just for illustration
44 gen x = cond(uniform()>=0.3,1,0) if resp==1 & t==1
45 by id : egen _x = min(x)
46     *Create dummy variables
47     gen x1 = 1 if _x==1
48     replace x1 = 0 if _x==0
49     gen x2 = 0 if _x==1
50     replace x2 = 1 if _x==0

```

```

1
2
3
4
5
6
7
8
9
10
11
12
13
14
15
16
17
18
19
20
21
22
23
24
25
26
27
28
29
30
31
32
33
34
35
36
37
38
39
40
41
42
43
44
45
46
47

drop x _x

* Predict response
gen y = (`b0' + u0)* w1 + (`b1' + u1)* w1 * t + e1* w1 + ///
        (`b2' + u2)* w2 + (`b3' + u3)* w2 * t + e2* w2 //

tempfile simdata
save `simdata' , replace

}
*****
* 2.1 Existing Methods (n.b. only for first response)
*****
use `simdata' , clear
* Working with the first and last measurement occassion
keep if t ==0 | t==3
sort id resp t
by id resp : gen d_y = y[_n] - y[_n-1]

*****
* 2.1.1 Existing RTN
*****
{
    sum y if t==0 & resp==1
    local rtn = r(mean) + 2*r(sd)
    by id resp: gen ex_rtn =cond(y>=`rtn',1 ,0) if _n==2 & resp==1
    by id resp: gen ex_rci = cond((d_y / sqrt(2*(`r(sd)' * sqrt(1-0.9))^2))>=1.96,1,0) if _n==2 & resp==1
    by id resp: gen ex_rtn_rci = cond(ex_rtn==1 & ex_rci==1 ,1,0) if _n==2 & resp==1

    tab ex_rtn if resp==1 // Number of individuals returning to normal
    tab ex_rci if resp==1 // Number of individuals significant change
    tab ex_rtn_rci if resp==1 // Number of individuals significant change & returning to normal
}

*****
* 2.1.2 Existing MID
*****
{
sum y if t==0 & resp==1
local mid = r(sd)*0.5
by id resp : gen ex_mid =cond(d_y>=`mid',1,0) if _n==2 & resp==1

tab ex_mid if resp==1 // Number of individuals with minimally important difference
}

*****
* 2.1.3 Existing MCID
* n.b using the 25th centile is pain is reverse coded.
*****
{
centile d_y if resp==1 & x1==1 , c(25)
}

```

```

1
2
3     local mcid = r(c_1)
4       by id resp: gen ex_mcid = cond(d_y>=`mcid',1,0) if _n==2 & resp==1
5
6         tab ex_mcid if resp==1           // Number of individuals meeting the MCID criteria
7     }
8
9     *****
10    * 2.1.4 Existing (OO) OMERACT-OARSI
11    *****
12    {
13    * 50% relative, 20% absolute single
14    * 20% relative, 10% absolute both
15
16    * Calculate Relative Change
17    by id resp: gen d_rely= (d_y/y[_n-1])*100
18      * Mark Single Changes
19      by id resp: gen ex_oo_single =1 if (d_y>=20 & d_y<.) | (d_rely>=50 & d_rely<.) & _n==2
20      * Mark Double Changes
21      by id resp: gen ex_oo_double =1 if (d_y>=10 & d_y<.) | (d_rely>=20 & d_rely<.) & _n==2
22      * Sum double changes
23      by id : egen ex_oo_double_sum = total(ex_oo_double) if d_y!=.
24
25    * Mark OO criteria
26    by id : gen _ex_oo = cond(ex_oo_single==1 | ex_oo_double_sum==2 , 1,0) if d_y!=.
27    by id : egen ex_oo = max(_ex_oo) if d_y!=.
28
29    tab ex_oo if resp==1 // Number of individuals meeting the oo criteria
30  }
31  *****
32  * 2.2 Multi-level Methods
33  *****
34  // Set the global macro to identify the location and version of mlwin
35  global MLwiN_path "C:\Program Files (x86)\MLwiN v2.36\i386\MLwiN.exe"
36  use `simdata' , clear
37  keep if resp==1
38
39  * Create a constant
40  gen cons=1
41
42  *****
43  * 2.2.1 MLM RTN / MID Model
44  *****
45  {
46  *
47  *           0-----1
48  *           1,2,3,4,5,6,7,8,9,0,1,2,3,4,5,6,7,8,9,0,
49  matrix a = (1,1,1)
50
51  runmlwin y cons t if resp==1 ,                               /// Fixed effect
52    level1(t: cons, residuals(_e, ) )                          /// Level 1 variance
53    level2(id: cons t, elements(a) residuals(_u, ) )           /// Level 2 varaince

```

```

1
2
3           maxiterations(10)  corr sd nopause           //           Modelling options
4
5 * Predict Individual effects
6 gen xb_fe = _b[cons] + _b[t]*t
7           gen xb_re = _u0 + _u1*t
8           gen xb = xb_fe + xb_re
9
10 * Predict to asses responsiveness at (3month)
11 gen xb_t = (_b[cons]+_u0) + (_b[t]+_u1)*3
12
13 * RTN threshold
14 local mlm_rtn = _b[FP1:cons] + 2*(_b[RP2:var(cons)]^0.5)
15
16 * Mark RTN
17 gen mlm_rtn = cond(xb_t>=`mlm_rtn',1,0)
18
19 * Calculate RCI
20 gen xb_d = _b[FP1:t] + _u1
21           gen se_d = (_se[FP1:t]^2 + _u1se^2)^0.5
22           gen z_d = xb_d / se_d
23
24 * Mark RCI
25 gen mlm_rci = cond(z_d>=1.96,1,0)
26
27 * Mark RTN RCI composite
28 gen mlm_rtn_rci = cond(mlm_rtn==1 & mlm_rci==1, 1, 0)
29           egen pickone = tag(id)
30
31           tab mlm_rtn_rci if pickone==1 // Number of individuals meeting the MLM RTN RCI  criteria
32 }
33 *****
34 * 2.2.2 MLM MID
35 *****
36 {
37 * MID Threshold @ 3 months
38 local mlm_mid = 0.5*(_b[RP2:var(cons)]^0.5)
39           gen mlm_mid = cond( (_b[t]+_u1)*3>=`mlm_mid' ,1,0 )
40           tab mlm_mid if pickone==1 // Number of individuals meeting the MLM MID criteria
41
42 * Drop previous residual and predictions
43 drop _u0 _u1 _u0se _u1se _e0 _e0se  xb_fe xb_re xb xb_t xb_d se_d z_d
44 }
45 *****
46 * 2.2.3 MLM MCID
47 *****
48 {
49 * Stratify intercept and slope by satisfaction
50 gen consx1= cons*x1
51           gen consx2 = cons*x2
52
53
54
55
56
57
58
59
60
61
62
63
64
65
66
67
68
69
70
71
72
73
74
75
76
77
78
79
80
81
82
83
84
85
86
87
88
89
90
91
92
93
94
95
96
97
98
99

```

```

1
2
3           gen tx1 = t*x1
4           gen tx2 = t*x2
5
6 * Specify RE variance matrix
7 *           0-----1-----2
8 *           1,2,3,4,5,6,7,8,9,0,1,2,3,4,5,6,7,8,9,0,1
9 matrix u = (1,1,1,0,0,1,0,0,1,1)
10
11 * Specify RE variance matrix
12 *           0-----1-----2
13 *           1,2,3,4,5,6,7,8,9,0,1,2,3,4,5,6,7,8,9,0,1
14 matrix e = (1,0,1)
15
16 runmlwin y consx1 tx1 consx2 tx2 if resp==1 , // Fixed effect
17           level1(t: consx1 consx2, elements(e) residuals(_e, norecode)) // Level 1 variance
18           level2(id: consx1 tx1 consx2 tx2 ,elements(u) residuals(_u, norecode)) // Level 2 variance
19           maxiterations(10) corr sd nopause // Modelling
20 options
21
22 * Estimate the Change for all individuals
23 gen xb_slope = (_b[tx1]+_u1)*x1 + (_b[tx2]+_u3)*tx2
24
25 * Find the 75th (inverse coding 25th) centile of those satisfied
26 centile xb_slope if tx1==3 , c(25)
27 local mlm_mcid = r(c_1)
28
29 *tag observations which have improvements greater than mcid
30 gen mlm_mcid = cond(xb_slope>=`mlm_mcid',1,0) if t==3
31 tab mlm_mcid if t==3 // Number of individuals meeting the MCID criteria
32 }
33 *****
34 * 2.2.4 MLM (OO) OMERACT-OARSI
35 *****
36 {
37 * 50% relative, 20 absolute single assuming a 0-100 score
38 * 20% relative, 10 absolute both assuming a 0-100 score
39 use `simdata' , clear
40 sort id t resp
41
42
43 * Create response indicators
44 gen cons =1
45 gen consw1 = cons*w1
46 gen consw2 = cons*w2
47 gen tw1 = t*w1
48 gen tw2 = t*w2
49
50 runmlwin y consw1 tw1 consw2 tw2 , // Fixed Effect
51           level1(resp:) // Level 1 variance
52
53
54
55
56
57
58
59
60
61
62
63
64
65
66
67
68
69
70
71
72
73
74
75
76
77
78
79
80
81
82
83
84
85
86
87
88
89
90
91
92
93
94
95
96
97
98
99

```



```

1
2
3       level2(t: consw1 consw2, residuals(_e, norecode ))           /// Level 2 variance
4       level3(id: consw1 tw1 consw2 tw2 , residuals(_u, norecode ))   /// Level 3 variance
5       maxiterations(10) corr sd nopause                             //      Modelling options
6
7 * Calculate predicted changes
8 gen mlm_d = (_b[tw1] + _u1 )*tw1 + (_b[tw2] + _u3 )*tw2
9       gen mlm_b1 = (_b[consw1] + _u0)*consw1 + (_b[consw2] + _u2)*consw2
10      gen mlm_relyd= (mlm_d /mlm_b1)*100
11
12 * Mark out responders
13       by id resp ,sort: gen mlm_oo_single =1 if (( mlm_d>=20 & mlm_d<.) | (mlm_relyd>=50 & mlm_relyd<.) ) & t==3
14       * Mark Double Changes
15       by id resp ,sort: gen mlm_oo_double =1 if ((mlm_d>=10 & mlm_d<.) | (mlm_relyd>=20 & mlm_relyd<.) ) & t==3
16       * Sum double changes
17       by id ,sort : egen mlm_oo_double_sum = total(mlm_oo_double) if t==3
18
19 * Mark OO criteria
20 by id : gen _mlm_oo = cond(mlm_oo_single==1 | mlm_oo_double_sum==2 , 1,0) if t==3
21 by id : egen mlm_oo = max(_mlm_oo) if t==3
22
23       tab mlm_oo if resp==1 // Number of individuals meeting the MLM OO criteria
24
25
26
27
28
29
30
31
32
33
34
35
36
37
38
39
40
41
42
43
44
45
46
47

```
