# Supplementary material for: A unified multi-level model approach to assessing patient responsiveness including; return to normal, minimally important differences and minimal clinically important improvement for patient reported outcome measures
Source: PubMed Central journal article supplement — BMJ Open. 2017 Jul 21;7(7):e014041. doi: 10.1136/bmjopen-2016-014041 (PMC5577889; doi:10.1136/bmjopen-2016-014041), 2017-07-21
Supplement: bmjopen-2016-014041supp001.pdf [file bmjopen-2016-014041supp001.pdf]

```

*****
* A unified multi-level model approach to assessing patient responsiveness
* including; return to normal, minimally important differences, and minimally
* clinical important differences for patient reported outcome measures.
*****
*
* Sayers A*, Wylde V, Lenguerrand E, Gooberman-Hill R, Dawson J, Beard D,
* Price A, Blom AW
*
* 1. Musculoskeletal Research Unit, School of Clinical Sciences,
* University of Bristol, Southmead Hospital, Westbury On Trym,
* Bristol, BS10 5NB.
* 2. Nuffield Department of Population Health, University of Oxford,
* Old Road Campus, Headington, Oxford OX3 7LF, UK
* 3. Biomedical Research Unit, Nuffield Department of Orthopaedics,
* Rheumatology and Musculoskeletal Science, Nuffield Orthopaedic Centre,
* Windmill Road, Oxford, OX2 9JA
*
* Address for Correspondence
* Adrian Sayers, Musculoskeletal Research Unit, School of Clinical Sciences,
* University of Bristol, Learning and Research Building (Level 1),
* Southmead Hospital, Westbury on Trym, Bristol, BS10 5NB
*
*
* E-mail: adrian.sayers@bristol.ac.uk
* Tel: 44 (0)117 4147880; Fax + 44(0)117 414 7924
*****
* Abstract
* Stata code to illustrate calculation of patient responsiveness using existing
* and multi-level model methods.
* Do file should be run completely in order to simulate data from a linear model
* and perform calculations.
* File requires MLWin and copy of runmlwin downloaded for Stata.
*****
* 1. Simulate a dataset
*****
{
* Design matrix in OO Format
set seed 111
clear
set obs 100
gen id= _n

* Set Parameters values
* Set Fixed Effect Parameters
local b0 = 49.19
local b1 = 44.35 / 3
local b2 = 39.12

```

```

                local b3 = 47.66 / 3
* Set Random Effect Standard Deviations & Correlation Matrix
local u0 = 25.3
    local u1 = 23.4 / 3
        local u2 = 18.5
            local u3 = 19.1 / 3
                matrix u = (`u0', `u1', `u2', `u3')'
                    matrix u_corr = (1      ,0.3 ,0.1 ,0.1 \ ///
                                     0.3 ,1      ,0.1 ,0.1 \ ///
                                     0.1 ,0.1 ,1      ,0.3 \ ///
                                     0.1 ,0.1 ,0.3 ,1      )

* Draw Random Parameters
    drawnorm u0 u1 u2 u3 , sds(u) corr(u_corr)

* Create 4 measurement occasions
expand 4
by id , sort : gen t = _n-1

* Prepare for a reshape into double long
gen _1= 1
    gen _2= 1
        reshape long _ , i(id t) j(resp)
            drop _

* Set error Standard Deviations & Correlation Matrix
local e1= 5
    local e2= 5
        matrix e = (`e1', `e2')'
            matrix e_corr = (1      ,0.1 \ ///
                             0.1 ,1      ) //

                drawnorm e1 e2 , sds(e) corr(e_corr)

* Create response indicators for 00
gen w1 = 1 if resp==1
    replace w1 = 0 if resp==2
        gen w2 = 0 if resp==1
            replace w2 = 1 if resp==2

* Generate a satisfaction indicator, uncorrelated with effects just for illustration
gen x = cond(uniform()>=0.3,1,0) if resp==1 & t==1
    by id : egen _x = min(x)
        *Create dummy variables
            gen x1 = 1 if _x==1
                replace x1 = 0 if _x==0
                    gen x2 = 0 if _x==1
                        replace x2 = 1 if _x==0

```

```

drop x _x

* Predict response
gen y = (`b0' + u0)* w1 + (`b1' + u1)* w1 * t + e1* w1 + ///
        (`b2' + u2)* w2 + (`b3' + u3)* w2 * t + e2* w2 //

tempfile simdata
save `simdata' , replace

}
*****
* 2.1 Existing Methods (n.b. only for first response)
*****
use `simdata' , clear
    * Working with the first and last measurement occassion
    keep if t ==0 | t==3
    sort id resp t
    by id resp : gen d_y = y[_n] - y[_n-1]
*****
* 2.1.1 Existing RTN
*****
{
    sum y if t==0 & resp==1
    local rtn = r(mean) + 2*r(sd)
    by id resp: gen ex_rtn =cond(y>=`rtn',1 ,0) if _n==2 & resp==1
    by id resp: gen ex_rci = cond((d_y / sqrt(2*(`r(sd)' * sqrt(1-0.9))^2))>=1.96,1,0) if _n==2 & resp==1
    by id resp: gen ex_rtn_rci = cond(ex_rtn==1 & ex_rci==1 ,1,0) if _n==2 & resp==1

    tab ex_rtn if resp==1          // Number of individuals returning to normal
    tab ex_rci if resp==1          // Number of individuals significant change
    tab ex_rtn_rci if resp==1      // Number of individuals significant change & returning to normal
}

*****
* 2.1.2 Existing MID
*****
{
sum y if t==0 & resp==1
    local mid = r(sd)*0.5
    by id resp : gen ex_mid =cond(d_y>=`mid',1,0) if _n==2 & resp==1

    tab ex_mid if resp==1          // Number of individuals with minimally important difference
}

*****
* 2.1.3 Existing MCID
* n.b using the 25th centile is pain is reverse coded.
*****
{
centile d_y if resp==1 & x1==1 , c(25)

```

```

local mcid = r(c_1)
  by id resp: gen ex_mcid = cond(d_y>=`mcid',1,0) if _n==2 & resp==1

      tab ex_mcid if resp==1          // Number of individuals meeting the MCID criteria
}

*****
* 2.1.4 Existing (OO) OMERACT-OARSI
*****
{
* 50% relative, 20% absolute single
* 20% relative, 10% absolute both

* Calculate Relative Change
  by id resp: gen d_rely= (d_y/y[_n-1])*100
    * Mark Single Changes
      by id resp: gen ex_oo_single =1 if (d_y>=20 & d_y<.) | (d_rely>=50 & d_rely<.) & _n==2
        * Mark Double Changes
          by id resp: gen ex_oo_double =1 if (d_y>=10 & d_y<.) | (d_rely>=20 & d_rely<.) & _n==2
            * Sum double changes
              by id : egen ex_oo_double_sum = total(ex_oo_double) if d_y!=.

* Mark OO criteria
  by id : gen _ex_oo = cond(ex_oo_single==1 | ex_oo_double_sum==2 , 1,0) if d_y!=.
  by id : egen ex_oo = max(_ex_oo) if d_y!=.

      tab ex_oo if resp==1  // Number of individuals meeting the oo criteria
}

*****
* 2.2 Multi-level Methods
*****
// Set the global macro to identify the location and version of mlwin
global MLwiN_path "C:\Program Files (x86)\MLwiN v2.36\i386\MLwiN.exe"
  use `simdata' , clear
  keep if resp==1

* Create a constant
gen cons=1

*****
* 2.2.1 MLM RTN / MID Model
*****
{
*
  0-----1
*
  1,2,3,4,5,6,7,8,9,0,1,2,3,4,5,6,7,8,9,0,
matrix a = (1,1,1)

runmlwin y cons t if resp==1 ,                               /// Fixed effect
  levell(t: cons, residuals(_e, ) )                          /// Level 1 variance
  level2(id: cons t, elements(a) residuals(_u, ) )           /// Level 2 variance
}

```

```

maxiterations(10) corr sd nopause // Modelling options

* Predict Individual effects
gen xb_fe = _b[cons] + _b[t]*t
gen xb_re = _u0 + _u1*t
gen xb = xb_fe + xb_re

* Predict to asses responsiveness at (3month)
gen xb_t = (_b[cons]+_u0) + (_b[t]+_u1)*3

* RTN threshold
local mlm_rtn = _b[FP1:cons] + 2*(_b[RP2:var(cons)]^0.5)

* Mark RTN
gen mlm_rtn = cond(xb_t>=`mlm_rtn',1,0)

* Calculate RCI
gen xb_d = _b[FP1:t] + _u1
gen se_d = (_se[FP1:t]^2 + _u1se^2)^0.5
gen z_d = xb_d / se_d

* Mark RCI
gen mlm_rci = cond(z_d>=1.96,1,0)

* Mark RTN RCI composite
gen mlm_rtn_rci = cond(mlm_rtn==1 & mlm_rci==1, 1, 0)
egen pickone = tag(id)

tab mlm_rtn_rci if pickone==1 // Number of individuals meeting the MLM RTN RCI criteria
}
*****
* 2.2.2 MLM MID
*****
{
* MID Threshold @ 3 months
local mlm_mid = 0.5*(_b[RP2:var(cons)]^0.5)
gen mlm_mid = cond( (_b[t]+_u1)*3>= `mlm_mid' ,1 ,0 )
tab mlm_mid if pickone==1 // Number of individuals meeting the MLM MID criteria

* Drop previous residual and predictions
drop _u0 _u1 _u0se _u1se _e0 _e0se xb_fe xb_re xb xb_t xb_d se_d z_d
}
*****
* 2.2.3 MLM MCID
*****
{
* Stratify intercept and slope by satisfaction
gen consx1= cons*x1
gen consx2 = cons*x2

```



```

level2(t: consw1 consw2, residuals(_e, norecode ))          /// Level 2 variance
level3(id: consw1 tw1 consw2 tw2 , residuals(_u, norecode ))  /// Level 3 varaince
maxiterations(10) corr sd nopause                          // Modelling options

* Calculate predicted changes
gen mlm_d = (_b[tw1] + _u1 )*tw1 + (_b[tw2] + _u3 )*tw2
gen mlm_b1 = (_b[consw1] + _u0)*consw1 + (_b[consw2] + _u2)*consw2
gen mlm_relyd= (mlm_d /mlm_b1)*100

* Mark out responders
by id resp ,sort: gen mlm_oo_single =1 if (( mlm_d>=20 & mlm_d<.) | (mlm_relyd>=50 & mlm_relyd<.) ) & t==3
* Mark Double Changes
by id resp ,sort: gen mlm_oo_double =1 if ((mlm_d>=10 & mlm_d<.) | (mlm_relyd>=20 & mlm_relyd<.) ) & t==3
* Sum double changes
by id ,sort : egen mlm_oo_double_sum = total(mlm_oo_double) if t==3

* Mark OO criteria
by id : gen _mlm_oo = cond(mlm_oo_single==1 | mlm_oo_double_sum==2 , 1,0) if t==3
by id : egen mlm_oo = max(_mlm_oo) if t==3

tab mlm_oo if resp==1 // Number of individuals meeting the MLM OO criteria
}

```
